# Supplementary material for: Diverse evolutionary trajectories of mitocoding DNA in mammalian and avian nuclear genomes
Source: HighWire-hosted journal article supplement (doi:10.1101/gr.279428.124), 2025-03-31
Supplement: Supplemental_Table_S2.xlsx [file Supplemental_Table_S2.xlsx]

## Sheet: Supplemental_Table_S2
Table S2: All mammalian host - donor pairs of NUMTs that likely originated from a different species.
Recipient species	NUMT ID	Donor scaffold ID	Donor species
Aepyceros melampus	SJXQ01006944.1:63574-66381	NC_020699.1	Connochaetes taurinus
Aepyceros melampus	SJXQ01006944.1:78349-91308	NC_039669.1	Eudorcas thomsonii
Aepyceros melampus	SJXQ01012544.1:217760-229605	NC_020728.1	Neotragus moschatus
Alcelaphus buselaphus	SJXN01419338.1:1-924	NC_020731.1	Oreotragus oreotragus
Alcelaphus buselaphus	SJXN01502202.1:1-1258	NC_020731.1	Oreotragus oreotragus
Alcelaphus buselaphus	SJXN01519847.1:1-1458	NC_020731.1	Oreotragus oreotragus
Antidorcas marsupialis	SJYB01001411.1:415501-429721	NC_038064.1	Tragelaphus buxtoni
Antidorcas marsupialis	SJYB01001417.1:1-2791	NC_020619.1	Tragelaphus imberbis
Capromys pilorides	PVKN010295767.1:1-2071	MH182628.1	Myocastor coypus
Capromys pilorides	PVKN010384087.1:1-1596	MH182628.1	Myocastor coypus
Capromys pilorides	PVKN010446846.1:5-1367	MH182628.1	Myocastor coypus
Cercocebus atys	KQ012355.1:3-10845	MT279060.1	Papio cynocephalus
Connochaetes taurinus	SJXO01003566.1:29476-32324	NC_020728.1	Neotragus moschatus
Connochaetes taurinus	SJXO01003566.1:33614-37513	NC_020731.1	Oreotragus oreotragus
Connochaetes taurinus	SJXO01003566.1:37516-40016	NC_020731.1	Oreotragus oreotragus
Connochaetes taurinus	SJXO01003566.1:40022-41032	NC_023543.1	Damaliscus lunatus
Connochaetes taurinus	SJXO01008237.1:3662-9673	NC_020731.1	Oreotragus oreotragus
Connochaetes taurinus	SJXO01031132.1:2-995	NC_020716.1	Litocranius walleri
Damaliscus lunatus	SJXP01001682.1:554157-557916	NC_020717.1	Madoqua kirkii
Damaliscus lunatus	SJXP01028617.1:645-2004	NC_039669.1	Eudorcas thomsonii
Globicephala melas	SWEB01018188.1:2-2398	JF339981.1	Orcaella heinsohni
Grammomys dolichurus	JADRCF010413261.1:6798-22558	NC_053796.1	Grammomys surdaster
Grammomys dolichurus	JADRCF010413435.1:6369-22634	NC_053796.1	Grammomys surdaster
Hylomyscus alleni	JADRCC010423236.1:3-5201	NC_053817.1	Praomys delectorum
Hylomyscus alleni	JADRCC010440781.1:1374-5158	NC_053817.1	Praomys delectorum
Kobus ellipsiprymnus	SJYR01000425.1:2296879-2300056	NC_020741.1	Raphicerus campestris
Kobus ellipsiprymnus	SJYR01005618.1:13172-14620	NC_020741.1	Raphicerus campestris
Kobus ellipsiprymnus	SJYR01005618.1:16132-17354	NC_020716.1	Litocranius walleri
Kobus ellipsiprymnus	SJYR01005618.1:17357-29292	NC_020716.1	Litocranius walleri
Kobus ellipsiprymnus	SJYR01006362.1:6541-8160	NC_020731.1	Oreotragus oreotragus
Kobus ellipsiprymnus	SJYR01006362.1:8162-9396	NC_020731.1	Oreotragus oreotragus
Kobus ellipsiprymnus	SJYR01008697.1:1346-2090	NC_020749.1	Tragelaphus eurycerus
Kobus ellipsiprymnus	SJYR01041124.1:1-436	NC_020733.1	Ourebia ourebi
Lasiurus borealis	PVJN01047125.1:438-16129	LR862378.1	Pipistrellus pipistrellus
Litocranius walleri	SJYG01000050.1:2667305-2675095	NC_020725.1	Nanger granti
Litocranius walleri	SJYG01000050.1:2675097-2676946	NC_020725.1	Nanger granti
Litocranius walleri	SJYG01000050.1:2676948-2680556	NC_020725.1	Nanger granti
Litocranius walleri	SJYG01000464.1:2038068-2051633	NC_020717.1	Madoqua kirkii
Litocranius walleri	SJYG01000694.1:15186-24971	NC_020717.1	Madoqua kirkii
Litocranius walleri	SJYG01001763.1:13312-17180	NC_020731.1	Oreotragus oreotragus
Litocranius walleri	SJYG01001763.1:34331-36646	NC_020717.1	Madoqua kirkii
Litocranius walleri	SJYG01001763.1:43492-49813	NC_020717.1	Madoqua kirkii
Litocranius walleri	SJYG01001763.1:9412-13316	NC_020731.1	Oreotragus oreotragus
Litocranius walleri	SJYG01001782.1:14418-18146	NC_020619.1	Tragelaphus imberbis
Litocranius walleri	SJYG01001808.1:31934-34678	NC_020794.1	Redunca arundinum
Mastomys natalensis	JADRCE010000330.1:1-7864	NC_053817.1	Praomys delectorum
Mastomys natalensis	JADRCE010211433.1:3-5966	NC_053817.1	Praomys delectorum
Neotragus moschatus	SJYA01015793.1:8768-9363	NC_020751.1	Tragelaphus scriptus
Neotragus moschatus	SJYA01027011.1:606-3468	NC_020751.1	Tragelaphus scriptus
Oreotragus oreotragus	SJYX01002424.1:264007-268147	NC_020741.1	Raphicerus campestris
Oreotragus oreotragus	SJYX01005088.1:946596-948408	MG674218.1	Procapra przewalskii
Oreotragus oreotragus	SJYX01005088.1:948412-950848	MG674218.1	Procapra przewalskii
Oreotragus oreotragus	SJYX01005088.1:976192-989154	NC_020741.1	Raphicerus campestris
Oreotragus oreotragus	SJYX01020057.1:472648-476481	NC_020750.1	Tragelaphus oryx
Tragelaphus buxtoni	SJYJ010121693.1:1646-6281	NC_020750.1	Tragelaphus oryx
Tragelaphus spekii	SJYL010027362.1:12760-19309	NC_020752.1	Tragelaphus strepsiceros
Tragelaphus spekii	SJYL010027362.1:19314-28803	NC_020752.1	Tragelaphus strepsiceros
Uropsilus gracilis	PVHY01136797.1:1-640	JX945574.1	Uropsilus investigator
Uropsilus gracilis	PVHY01234914.1:1-399	JX945574.1	Uropsilus investigator
Uropsilus gracilis	PVHY01234916.1:3-399	JX945574.1	Uropsilus investigator
Uropsilus gracilis	PVHY01234920.1:1-399	JX945574.1	Uropsilus investigator
Uropsilus gracilis	PVHY01234921.1:1-399	JX945574.1	Uropsilus investigator
Uropsilus gracilis	PVHY01234922.1:1-399	JX945574.1	Uropsilus investigator
Uropsilus gracilis	PVHY01234923.1:1-399	JX945574.1	Uropsilus investigator
Uropsilus gracilis	PVHY01240039.1:1-399	JX945574.1	Uropsilus investigator
Uropsilus gracilis	PVHY01241836.1:1-396	JX945574.1	Uropsilus investigator
Uropsilus gracilis	PVHY01587258.1:1-211	JX945574.1	Uropsilus investigator
