# Supplementary material for: Diverse evolutionary trajectories of mitocoding DNA in mammalian and avian nuclear genomes
Source: HighWire-hosted journal article supplement (doi:10.1101/gr.279428.124), 2025-03-31
Supplement: Supplemental_Table_S3.xlsx [file Supplemental_Table_S3.xlsx]

## Sheet: Supplemental_Table_S3
Table S3: All avian host - donor pairs of NUMTs that likely originated from a different species.
Recipient species	NUMT ID	Donor scaffold ID	Donor species
Accipiter gentilis	BJER01014652.1:2587-13711	NC_040858.1	Haliaeetus albicilla
Accipiter nisus	BJBX01032538.1:1946-9915	NC_007598.1	Nisaetus nipalensis
Alaudala cheleensis	VWYE01023216.1:285-2530	MN356176.1	Eubucco bourcierii
Alaudala cheleensis	VWYE01025130.1:1181-2744	MN356176.1	Eubucco bourcierii
Alectura lathami	VXAV01019081.1:1-243	MN356205.1	Podargus strigoides
Amazona guildingii	VXAR01004813.1:3-2347	MN356178.1	Ciccaba nigrolineata
Ardeotis kori	VWPR01004058.1:3-14691	MN356168.1	Chunga burmeisteri
Ardeotis kori	VWPR01004420.1:10-11094	MN356171.1	Corythaeola cristata
Ardeotis kori	VWPR01004927.1:2-7492	NC_052777.1	Oceanites oceanicus
Ardeotis kori	VWPR01004928.1:1-7417	MN356296.1	Fregetta grallaria
Ardeotis kori	VWPR01004976.1:1-7095	MN356169.1	Lophotis ruficrista
Ardeotis kori	VWPR01004981.1:1-7148	MN356335.1	Columbina picui
Ardeotis kori	VWPR01005076.1:11-6610	MN356335.1	Columbina picui
Ardeotis kori	VWPR01005609.1:1-4398	NC_052777.1	Oceanites oceanicus
Ardeotis kori	VWPR01005612.1:1-4387	MN356296.1	Fregetta grallaria
Ardeotis kori	VWPR01005988.1:1-3480	MN356169.1	Lophotis ruficrista
Ardeotis kori	VWPR01006295.1:1-2439	MN356169.1	Lophotis ruficrista
Ardeotis kori	VWPR01006460.1:1120-2031	MN356168.1	Chunga burmeisteri
Ardeotis kori	VWPR01007644.1:1-1304	NC_052777.1	Oceanites oceanicus
Calcarius ornatus	WBNL01002795.1:1249-15094	NC_051005.1	Tachuris rubrigastra
Calcarius ornatus	WBNL01004589.1:1-5582	NC_051007.1	Chaetorhynchus papuensis
Calcarius ornatus	WBNL01004938.1:1-4531	NC_051007.1	Chaetorhynchus papuensis
Calcarius ornatus	WBNL01006140.1:6-3070	NC_052776.1	Ceuthmochares aereus
Cardinalis cardinalis	JACDOX010002323.1:1662-3477	NC_024873.1	Malurus melanocephalus
Cardinalis cardinalis	JACDOX010002404.1:1-2499	NC_024873.1	Malurus melanocephalus
Catharus fuscescens	VWYD01001085.1:1-4416	NC_051035.1	Pachyramphus minor
Centropus unirufus	VYZI01002497.1:1-6680	MN356281.1	Scopus umbretta
Cepphus grylle	VZUD01007744.1:1-11524	MN356420.1	Rissa tridactyla
Cepphus grylle	VZUD01059802.1:105-757	MN356420.1	Rissa tridactyla
Ceuthmochares aereus	VWPQ01010625.1:1-12395	MN356162.1	Nyctibius bracteatus
Ceuthmochares aereus	VWPQ01010923.1:3-12283	MN356159.1	Cochlearius cochlearius
Chaetops frenatus	VZTR01020718.1:1585-5041	NC_053078.1	Picathartes gymnocephalus
Chaetops frenatus	VZTR01034288.1:1-931	NC_053078.1	Picathartes gymnocephalus
Chaetorhynchus papuensis	VWYX01003466.1:2137-17025	NC_051005.1	Tachuris rubrigastra
Chaetorhynchus papuensis	VWYX01003986.1:68-5577	MN356161.1	Glareola pratincola
Chaetorhynchus papuensis	VWYX01006041.1:1-1611	MN356161.1	Glareola pratincola
Chloropsis cyanopogon	WEZZ01027223.1:291-1152	NC_053069.1	Erpornis zantholeuca
Chloropsis hardwickii	WEIW01007269.1:1-4567	NC_053084.1	Spizella passerina
Chloropsis hardwickii	WEIW01007351.1:23-4410	NC_053084.1	Spizella passerina
Chloropsis hardwickii	WEIW01008930.1:1-2036	NC_053084.1	Spizella passerina
Chloropsis hardwickii	WEIW01009037.1:1-1853	NC_053084.1	Spizella passerina
Chroicocephalus maculipennis	VYZF01005951.1:408-15281	MN356281.1	Scopus umbretta
Chunga burmeisteri	VZRC01001837.1:44-14913	MN356169.1	Lophotis ruficrista
Chunga burmeisteri	VZRC01001915.1:1-12198	MN356171.1	Corythaeola cristata
Chunga burmeisteri	VZRC01001964.1:4-10741	MN356335.1	Columbina picui
Chunga burmeisteri	VZRC01002125.1:9-7363	NC_052777.1	Oceanites oceanicus
Chunga burmeisteri	VZRC01002146.1:24-7084	MN356296.1	Fregetta grallaria
Chunga burmeisteri	VZRC01002347.1:1-4393	MN356296.1	Fregetta grallaria
Chunga burmeisteri	VZRC01002667.1:2-2453	NC_052777.1	Oceanites oceanicus
Chunga burmeisteri	VZRC01002729.1:1-1971	NC_052777.1	Oceanites oceanicus
Chunga burmeisteri	VZRC01003038.1:2-1236	NC_052777.1	Oceanites oceanicus
Ciccaba nigrolineata	VWZC01016373.1:3-650	MN356436.1	Manacus manacus
Cinclus mexicanus	VWYM01028091.1:607-2030	MN356436.1	Manacus manacus
Circaetus pectoralis	VZZV01002317.1:1-8474	NC_052809.1	Pelecanoides urinatrix
Circaetus pectoralis	VZZV01002492.1:1339-4555	NC_052809.1	Pelecanoides urinatrix
Cochlearius cochlearius	VWPP01001683.1:62-13129	MN356162.1	Nyctibius bracteatus
Cochlearius cochlearius	VWPP01001827.1:1-9482	MN356161.1	Glareola pratincola
Cochlearius cochlearius	VWPP01002164.1:1-4682	MN356161.1	Glareola pratincola
Columbina picui	VYZG01004833.1:1-14100	MN356171.1	Corythaeola cristata
Columbina picui	VYZG01005584.1:1-9634	NC_007883.1	Menura novaehollandiae
Columbina picui	VYZG01005592.1:33-9468	MN356169.1	Lophotis ruficrista
Columbina picui	VYZG01007323.1:1-4789	NC_052777.1	Oceanites oceanicus
Columbina picui	VYZG01007471.1:1-4443	MN356296.1	Fregetta grallaria
Columbina picui	VYZG01007525.1:1-4305	MN356296.1	Fregetta grallaria
Columbina picui	VYZG01007973.1:1-4003	NC_053645.1	Rhodinocichla rosea
Columbina picui	VYZG01010643.1:1-1479	MN356169.1	Lophotis ruficrista
Corythaeola cristata	WBMX01021207.1:1-5396	NC_052777.1	Oceanites oceanicus
Corythaeola cristata	WBMX01022060.1:1-4788	MN356169.1	Lophotis ruficrista
Corythaeola cristata	WBMX01022538.1:1-4445	MN356296.1	Fregetta grallaria
Corythaeola cristata	WBMX01022539.1:5-4392	MN356296.1	Fregetta grallaria
Corythaeola cristata	WBMX01022902.1:1-4157	NC_052777.1	Oceanites oceanicus
Corythaeola cristata	WBMX01026581.1:1-2444	MN356169.1	Lophotis ruficrista
Corythaeola cristata	WBMX01029750.1:1-1420	MN356169.1	Lophotis ruficrista
Crypturellus soui	VWPX01001073.1:17778-22875	NC_052820.1	Nothoprocta ornata
Crypturellus soui	VWPX01001073.1:5030-9437	NC_052820.1	Nothoprocta ornata
Crypturellus soui	VWPX01001073.1:9898-17452	NC_052820.1	Nothoprocta ornata
Daphoenositta chrysoptera	VZRO01004082.1:1-2481	NC_053095.1	Malurus elegans
Daphoenositta chrysoptera	VZRO01005027.1:1-2352	NC_053095.1	Malurus elegans
Daphoenositta chrysoptera	VZRO01007654.1:1-1786	NC_053098.1	Grantiella picta
Daphoenositta chrysoptera	VZRO01007781.1:266-2412	NC_053095.1	Malurus elegans
Dicaeum eximium	VWZP01004946.1:1116-15095	NC_051028.1	Dicrurus megarhynchus
Emberiza fucata	VYZJ01007126.1:1-3725	MN356305.1	Sylvietta virens
Emberiza fucata	VYZJ01007504.1:1-3183	MN356305.1	Sylvietta virens
Emberiza fucata	VYZJ01007683.1:113-2967	MN356305.1	Sylvietta virens
Emberiza fucata	VYZJ01007776.1:1-2860	MN356305.1	Sylvietta virens
Erythrocercus mccallii	VZRG01005867.1:2147-15714	NC_051464.1	Pomatostomus ruficeps
Eulacestoma nigropectus	VZTE01007055.1:1-1024	NC_053086.1	Orthonyx spaldingii
Fregetta grallaria	VZZT01008343.1:1-9576	MN356169.1	Lophotis ruficrista
Fregetta grallaria	VZZT01012216.1:1-2821	NC_052777.1	Oceanites oceanicus
Fregetta grallaria	VZZT01012286.1:1-2818	NC_052777.1	Oceanites oceanicus
Fregetta grallaria	VZZT01012358.1:1-2663	NC_052777.1	Oceanites oceanicus
Fregetta grallaria	VZZT01012693.1:1-2073	NC_052777.1	Oceanites oceanicus
Fregetta grallaria	VZZT01013769.1:1-1435	MN356169.1	Lophotis ruficrista
Fregetta grallaria	VZZT01013821.1:1-1400	MN356169.1	Lophotis ruficrista
Geococcyx californianus	VWPV01048420.1:1-1585	NC_051005.1	Tachuris rubrigastra
Glareola pratincola	VWPO01005909.1:946-15831	MN356162.1	Nyctibius bracteatus
Grantiella picta	VZRM01003939.1:2-1761	NC_053095.1	Malurus elegans
Grantiella picta	VZRM01009464.1:1-943	NC_053095.1	Malurus elegans
Guaruba guarouba	JAABOC010028778.1:9905622-9910481	NC_027847.1	Psittacus erithacus
Guaruba guarouba	JAABOC010036778.1:3361311-3364793	NC_027847.1	Psittacus erithacus
Guaruba guarouba	JAABOC010044612.1:1-2449	NC_027847.1	Psittacus erithacus
Halcyon senegalensis	WBNJ01001509.1:532-15423	MK060142.1	Pogoniulus bilineatus
Herpetotheres cachinnans	VXAJ01001505.1:1-12450	NC_052814.1	Pterocles burchelli
Herpetotheres cachinnans	VXAJ01001808.1:1-4474	MN356297.1	Rostratula benghalensis
Herpetotheres cachinnans	VXAJ01002132.1:1-1887	MN356297.1	Rostratula benghalensis
Himantopus himantopus	VXBK01010388.1:1-11669	MN356246.1	Nycticryphes semicollaris
Ifrita kowaldi	VZRS01009106.1:1-1136	NC_053094.1	Machaerirhynchus nigripectus
Indicator maculatus	VXBD01007176.1:1-609	MN356436.1	Manacus manacus
Irena cyanogastra	VWZV01017640.1:169-869	CM023771.1	Nyctibius grandis
Jacana jacana	VZTM01039769.1:19-3643	MN356205.1	Podargus strigoides
Jacana jacana	VZTM01039769.1:3736-5119	MN356205.1	Podargus strigoides
Larus smithsonianus	WAAC01025767.1:1-3500	MN356262.1	Tricholaema leucomelas
Larus smithsonianus	WAAC01031414.1:1-2470	MN356262.1	Tricholaema leucomelas
Leptocoma aspasia	VXAX01008605.1:1-644	MN356261.1	Rhinoptilus africanus
Locustella ochotensis	VXBM01004146.1:1-8843	NC_053106.1	Panurus biarmicus
Locustella ochotensis	VXBM01005598.1:1-3529	NC_053106.1	Panurus biarmicus
Lophotis ruficrista	VWYV01003296.1:6-7430	NC_052777.1	Oceanites oceanicus
Lophotis ruficrista	VWYV01003517.1:1-4461	NC_052777.1	Oceanites oceanicus
Lophotis ruficrista	VWYV01004326.1:1-1224	NC_052777.1	Oceanites oceanicus
Lophotis ruficrista	VWYV01004506.1:1-1233	NC_053645.1	Rhodinocichla rosea
Menura novaehollandiae	VWPS01002014.1:1383-2055	NC_051006.1	Ptilorrhoa leucosticta
Nothoprocta pentlandii	VZSG01001962.1:1919-16722	NC_052826.1	Nothoprocta perdicaria
Nothoprocta pentlandii	VZSG01001962.1:23-853	NC_052826.1	Nothoprocta perdicaria
Origma solitaria	VZRL01006620.1:228-1111	NC_053086.1	Orthonyx spaldingii
Probosciger aterrimus	VYZH01009335.1:1-12448	MN356196.1	Ramphastos sulfuratus
Psophia crepitans	VWZZ01002434.1:1-5366	MN356267.1	Thinocorus orbignyianus
Psophia crepitans	VWZZ01002870.1:24-9510	MN356267.1	Thinocorus orbignyianus
Pterocles burchelli	VYZE01004000.1:1-12360	MN356297.1	Rostratula benghalensis
Ptilorrhoa leucosticta	VWYY01006238.1:679-3239	NC_053645.1	Rhodinocichla rosea
Rhabdornis inornatus	VWZS01009731.1:1-2286	MN356202.1	Zosterops hypoxanthus
Rhegmatorhina hoffmannsi	VZSN02006152.1:2-1451	NC_024750.1	Tadorna tadorna
Rynchops niger	VXBH01009459.1:1-683	NC_052780.1	Stercorarius parasiticus
