# Supplementary material for: Diverse evolutionary trajectories of mitocoding DNA in mammalian and avian nuclear genomes
Source: HighWire-hosted journal article supplement (doi:10.1101/gr.279428.124), 2025-03-31
Supplement: Supplemental_Table_S5.xlsx [file Supplemental_Table_S5.xlsx]

## Sheet: Supplemental_Table_S5
Table S5: All identifiers of the genomes and mitogenomes and their respective species used in this study
Genome	Assembly_accession	mtGenome	Accession_number	Length	cds_number	Download_link
Mammal
Acinonyx jubatus	GCA_003709585.1	Acinonyx jubatus	NC_005212.1	17047	13	https://ftp.ncbi.nlm.nih.gov/genomes/all/GCA/003/709/585/GCA_003709585.1_Aci_jub_2
Acomys cahirinus	GCA_004027535.1	Acomys cahirinus	JN571155.1	16217	13	https://ftp.ncbi.nlm.nih.gov/genomes/all/GCA/004/027/535/GCA_004027535.1_AcoCah_v1_BIUU
Acrobates pygmaeus	GCA_904813335.1	Acrobates pygmaeus	KJ868094.1	15322	11	https://ftp.ncbi.nlm.nih.gov/genomes/all/GCA/904/813/335/GCA_904813335.1_ERS5079794_MarsupialExonCaptKit
Addax nasomaculatus	GCA_019593525.1	Addax nasomaculatus	NC_020674.1	16751	13	https://ftp.ncbi.nlm.nih.gov/genomes/all/GCA/019/593/525/GCA_019593525.1_ASM1959352v1
Aepyceros melampus	GCA_006408695.1	Aepyceros melampus	NC_020675.1	16422	13	https://ftp.ncbi.nlm.nih.gov/genomes/all/GCA/006/408/695/GCA_006408695.1_IMP
Aepyprymnus rufescens	GCA_904813175.1	Aepyprymnus rufescens	KJ868095.1	16828	13	https://ftp.ncbi.nlm.nih.gov/genomes/all/GCA/904/813/175/GCA_904813175.1_ERS5079784_MarsupialExonCaptKit
Ailuropoda melanoleuca	GCA_002007445.2	Ailuropoda melanoleuca	NC_009492.1	16805	13	https://ftp.ncbi.nlm.nih.gov/genomes/all/GCA/002/007/445/GCA_002007445.2_ASM200744v2
Ailurus fulgens styani	GCA_002007465.1	Ailurus fulgens styani	NC_009691.1	16374	13	https://ftp.ncbi.nlm.nih.gov/genomes/all/GCA/002/007/465/GCA_002007465.1_ASM200746v1
Alcelaphus buselaphus	GCA_006408545.1	Alcelaphus buselaphus	NC_020676.1	16373	13	https://ftp.ncbi.nlm.nih.gov/genomes/all/GCA/006/408/545/GCA_006408545.1_HBT
Alces alces	GCA_007570765.1	Alces alces	NC_020677.1	16417	13	https://ftp.ncbi.nlm.nih.gov/genomes/all/GCA/007/570/765/GCA_007570765.1_GSC_moose_1.0
Alouatta palliata	GCA_004027835.1	Alouatta palliata	L22774.1	696	1	https://ftp.ncbi.nlm.nih.gov/genomes/all/GCA/004/027/835/GCA_004027835.1_AloPal_v1_BIUU
Ammotragus lervia	GCA_002201775.1	Ammotragus lervia	NC_009510.1	16530	13	https://ftp.ncbi.nlm.nih.gov/genomes/all/GCA/002/201/775/GCA_002201775.1_ALER1.0
Anoura caudifer	GCA_004027475.1	Anoura caudifer	HG003307.1	16546	13	https://ftp.ncbi.nlm.nih.gov/genomes/all/GCA/004/027/475/GCA_004027475.1_AnoCau_v1_BIUU
Antechinomys laniger	GCA_904810915.1	Antechinomys laniger	KJ868097.1	15430	13	https://ftp.ncbi.nlm.nih.gov/genomes/all/GCA/904/810/915/GCA_904810915.1_ERS5079555_MarsupialExonCaptKit
Antechinus flavipes	GCA_016432865.1	Antechinus flavipes	NC_056379.1	17381	13	https://ftp.ncbi.nlm.nih.gov/genomes/all/GCA/016/432/865/GCA_016432865.1_AdamAnt
Antechinus godmani	GCA_904810635.1	Antechinus godmani	KJ868099.1	17341	13	https://ftp.ncbi.nlm.nih.gov/genomes/all/GCA/904/810/635/GCA_904810635.1_ERS5079535_MarsupialExonCaptKit
Antidorcas marsupialis	GCA_006408585.1	Antidorcas marsupialis	NC_020678.1	16444	13	https://ftp.ncbi.nlm.nih.gov/genomes/all/GCA/006/408/585/GCA_006408585.1_SGB
Antilocapra americana	GCA_007570785.1	Antilocapra americana	NC_020679.1	16352	13	https://ftp.ncbi.nlm.nih.gov/genomes/all/GCA/007/570/785/GCA_007570785.1_GSC_phorn_1.0
Aotus nancymaae	GCA_000952055.2	Aotus nancymaae	NC_018116.1	16469	13	https://ftp.ncbi.nlm.nih.gov/genomes/all/GCA/000/952/055/GCA_000952055.2_Anan_2.0
Apodemus speciosus	GCA_002335545.1	Apodemus speciosus	AB032849.1	1140	1	https://ftp.ncbi.nlm.nih.gov/genomes/all/GCA/002/335/545/GCA_002335545.1_Aspe_assembly01
Apodemus sylvaticus	GCA_001305905.1	Apodemus sylvaticus	NC_049122.1	16308	13	https://ftp.ncbi.nlm.nih.gov/genomes/all/GCA/001/305/905/GCA_001305905.1_ASM130590v1
Arctocephalus gazella	GCA_900642305.1	Arctocephalus gazella	BK010918.1	16156	13	https://ftp.ncbi.nlm.nih.gov/genomes/all/GCA/900/642/305/GCA_900642305.1_arcGaz3
Artibeus jamaicensis	GCA_014825515.1	Artibeus jamaicensis	NC_002009.1	16651	13	https://ftp.ncbi.nlm.nih.gov/genomes/all/GCA/014/825/515/GCA_014825515.1_WHU_Ajam_v2
Arvicanthis niloticus	GCA_011762505.1	Arvicanthis niloticus	CM022273.1	16269	13	https://ftp.ncbi.nlm.nih.gov/genomes/all/GCA/011/762/505/GCA_011762505.1_mArvNil1.pat.X
Arvicola amphibius	GCA_903992535.2	Arvicola amphibius	MN122828.1	16356	13	https://ftp.ncbi.nlm.nih.gov/genomes/all/GCA/903/992/535/GCA_903992535.2_mArvAmp1.2
Ateles geoffroyi	GCA_004024785.1	Ateles geoffroyi	AB016730.1	1540	1	https://ftp.ncbi.nlm.nih.gov/genomes/all/GCA/004/024/785/GCA_004024785.1_AteGeo_v1_BIUU
Axis porcinus	GCA_003798545.1	Axis porcinus	NC_020681.1	16375	13	https://ftp.ncbi.nlm.nih.gov/genomes/all/GCA/003/798/545/GCA_003798545.1_ASM379854v1
Balaenoptera acutorostrata scammoni	GCA_000493695.1	Balaenoptera acutorostrata	NC_005271.1	16417	13	https://ftp.ncbi.nlm.nih.gov/genomes/all/GCA/000/493/695/GCA_000493695.1_BalAcu1.0
Balaenoptera bonaerensis	GCA_000978805.1	Balaenoptera bonaerensis	NC_006926.1	16421	13	https://ftp.ncbi.nlm.nih.gov/genomes/all/GCA/000/978/805/GCA_000978805.1_ASM97880v1
Balaenoptera musculus	GCA_009873245.3	Balaenoptera musculus	NC_001601.1	16402	13	https://ftp.ncbi.nlm.nih.gov/genomes/all/GCA/009/873/245/GCA_009873245.3_mBalMus1.pri.v3
Balaenoptera physalus	GCA_008795845.1	Balaenoptera physalus	NC_001321.1	16398	13	https://ftp.ncbi.nlm.nih.gov/genomes/all/GCA/008/795/845/GCA_008795845.1_Baphy
Beatragus hunteri	GCA_004027495.1	Beatragus hunteri	NC_023542.1	16359	13	https://ftp.ncbi.nlm.nih.gov/genomes/all/GCA/004/027/495/GCA_004027495.1_BeaHun_v1_BIUU
Bettongia lesueur	GCA_904813165.1	Bettongia lesueur	KJ868101.1	16857	13	https://ftp.ncbi.nlm.nih.gov/genomes/all/GCA/904/813/165/GCA_904813165.1_ERS5079780_MarsupialExonCaptKit
Bettongia penicillata	GCA_904813155.1	Bettongia penicillata	KJ868102.1	16850	13	https://ftp.ncbi.nlm.nih.gov/genomes/all/GCA/904/813/155/GCA_904813155.1_ERS5079779_MarsupialExonCaptKit
Bison bison bison	GCA_000754665.1	Bison bison bison	KX451352.1	15548	13	https://ftp.ncbi.nlm.nih.gov/genomes/all/GCA/000/754/665/GCA_000754665.1_Bison_UMD1.0
Bos frontalis	GCA_007844835.1	Bos frontalis	NC_036020.1	16346	13	https://ftp.ncbi.nlm.nih.gov/genomes/all/GCA/007/844/835/GCA_007844835.1_NRC_Mithun_1
Bos gaurus	GCA_014182915.2	Bos gaurus	CM024465.1	16346	13	https://ftp.ncbi.nlm.nih.gov/genomes/all/GCA/014/182/915/GCA_014182915.2_ARS_UOA_Gaur_1.1
Bos grunniens	GCA_005887515.2	Bos grunniens	NC_006380.3	16323	13	https://ftp.ncbi.nlm.nih.gov/genomes/all/GCA/005/887/515/GCA_005887515.2_BosGru3.0
Bos grunniens x Bos taurus	GCA_009493655.1	Bos grunniens x Bos taurus	NC_046055.1	16322	13	https://ftp.ncbi.nlm.nih.gov/genomes/all/GCA/009/493/655/GCA_009493655.1_ARS_UNL_Btau-highland_paternal_1.0_alt
Bos indicus	GCA_000247795.2	Bos indicus	NC_005971.1	16341	13	https://ftp.ncbi.nlm.nih.gov/genomes/all/GCA/000/247/795/GCA_000247795.2_Bos_indicus_1.0
Bos indicus x Bos taurus	GCA_003369695.2	Bos indicus x Bos taurus	CM010492.2	16339	13	https://ftp.ncbi.nlm.nih.gov/genomes/all/GCA/003/369/695/GCA_003369695.2_UOA_Brahman_1
Bos mutus	GCA_000298355.1	Bos mutus	NC_025563.1	16322	13	https://ftp.ncbi.nlm.nih.gov/genomes/all/GCA/000/298/355/GCA_000298355.1_BosGru_v2.0
Bos taurus	GCA_002263795.2	Bos taurus	NC_006853.1	16338	13	https://ftp.ncbi.nlm.nih.gov/genomes/all/GCA/002/263/795/GCA_002263795.2_ARS-UCD1.2
Bradypus variegatus	GCA_004027775.1	Bradypus variegatus	NC_028501.1	16641	13	https://ftp.ncbi.nlm.nih.gov/genomes/all/GCA/004/027/775/GCA_004027775.1_BraVar_v1_BIUU
Bubalus bubalis	GCA_019923925.1	Bubalus bubalis	NC_049568.1	16358	13	https://ftp.ncbi.nlm.nih.gov/genomes/all/GCA/019/923/925/GCA_019923925.1_NDDB_DH_1
Bubalus bubalis bubalis	GCA_905249985.1	Bubalus bubalis	NC_049568.1	16358	13	https://ftp.ncbi.nlm.nih.gov/genomes/all/GCA/905/249/985/GCA_905249985.1_Buffalo_MAGs
Burramys parvus	GCA_904813065.1	Burramys parvus	KJ868103.1	15347	13	https://ftp.ncbi.nlm.nih.gov/genomes/all/GCA/904/813/065/GCA_904813065.1_ERS5079774_MarsupialExonCaptKit
Callithrix jacchus	GCA_009663435.2	Callithrix jacchus	NC_025586.1	16499	13	https://ftp.ncbi.nlm.nih.gov/genomes/all/GCA/009/663/435/GCA_009663435.2_Callithrix_jacchus_cj1700_1.1
Callorhinus ursinus	GCA_003265705.1	Callorhinus ursinus	NC_008415.3	16668	13	https://ftp.ncbi.nlm.nih.gov/genomes/all/GCA/003/265/705/GCA_003265705.1_ASM326570v1
Camelus bactrianus	GCA_000767855.1	Camelus bactrianus	NC_009628.2	16659	13	https://ftp.ncbi.nlm.nih.gov/genomes/all/GCA/000/767/855/GCA_000767855.1_Ca_bactrianus_MBC_1.0
Camelus dromedarius	GCA_000803125.3	Camelus dromedarius	NC_009849.1	16643	13	https://ftp.ncbi.nlm.nih.gov/genomes/all/GCA/000/803/125/GCA_000803125.3_CamDro3
Camelus ferus	GCA_009834535.1	Camelus ferus	NC_009629.2	16680	13	https://ftp.ncbi.nlm.nih.gov/genomes/all/GCA/009/834/535/GCA_009834535.1_BCGSAC_Cfer_1.0
Canis lupus	GCA_905319855.2	Canis lupus	HG998573.1	16690	13	https://ftp.ncbi.nlm.nih.gov/genomes/all/GCA/905/319/855/GCA_905319855.2_mCanLor1.2
Canis lupus dingo	GCA_012295265.1	Canis lupus	HG998573.1	16690	13	https://ftp.ncbi.nlm.nih.gov/genomes/all/GCA/012/295/265/GCA_012295265.1_UNSW_AlpineDingo_1.0
Canis lupus familiaris	GCA_014441545.1	Canis lupus familiaris	CM025140.1	16729	13	https://ftp.ncbi.nlm.nih.gov/genomes/all/GCA/014/441/545/GCA_014441545.1_ROS_Cfam_1.0
Capra aegagrus	GCA_000978405.1	Capra aegagrus	NC_028161.1	16625	13	https://ftp.ncbi.nlm.nih.gov/genomes/all/GCA/000/978/405/GCA_000978405.1_CapAeg_1.0
Capra hircus	GCA_001704415.1	Capra hircus	NC_005044.2	16643	13	https://ftp.ncbi.nlm.nih.gov/genomes/all/GCA/001/704/415/GCA_001704415.1_ARS1
Capra ibex	GCA_006410555.1	Capra ibex	FJ207526.1	16716	13	https://ftp.ncbi.nlm.nih.gov/genomes/all/GCA/006/410/555/GCA_006410555.1_IBX
Capra sibirica	GCA_003182615.2	Capra sibirica	FJ207529.1	16583	13	https://ftp.ncbi.nlm.nih.gov/genomes/all/GCA/003/182/615/GCA_003182615.2_ASM318261v2
Capreolus capreolus	GCA_000751575.1	Capreolus capreolus	JN632610.1	16358	13	https://ftp.ncbi.nlm.nih.gov/genomes/all/GCA/000/751/575/GCA_000751575.1_kmer631
Capreolus pygargus	GCA_012922965.1	Capreolus pygargus	NC_025271.1	16357	13	https://ftp.ncbi.nlm.nih.gov/genomes/all/GCA/012/922/965/GCA_012922965.1_ASM1292296v1
Capromys pilorides	GCA_004027915.1	Capromys pilorides	KU892766.1	16690	13	https://ftp.ncbi.nlm.nih.gov/genomes/all/GCA/004/027/915/GCA_004027915.1_CapPil_v1_BIUU
Caracal caracal	GCA_016801355.1	Caracal caracal	KP202272.1	16859	13	https://ftp.ncbi.nlm.nih.gov/genomes/all/GCA/016/801/355/GCA_016801355.1_CarCar1.0
Carlito syrichta	GCA_000164805.2	Carlito syrichta	NC_012774.1	17004	13	https://ftp.ncbi.nlm.nih.gov/genomes/all/GCA/000/164/805/GCA_000164805.2_Tarsius_syrichta-2.0.1
Carollia perspicillata	GCA_004027735.1	Carollia perspicillata	NC_022422.1	16711	13	https://ftp.ncbi.nlm.nih.gov/genomes/all/GCA/004/027/735/GCA_004027735.1_CarPer_v1_BIUU
Castor canadensis	GCA_001984765.1	Castor canadensis	NC_033912.1	16767	13	https://ftp.ncbi.nlm.nih.gov/genomes/all/GCA/001/984/765/GCA_001984765.1_C.can_genome_v1.0
Catagonus wagneri	GCA_004024745.2	Catagonus wagneri	KY987545.1	16516	4	https://ftp.ncbi.nlm.nih.gov/genomes/all/GCA/004/024/745/GCA_004024745.2_CatWag_v2_BIUU_UCD
Cavia aperea	GCA_000688575.1	Cavia aperea	NC_046949.1	16681	13	https://ftp.ncbi.nlm.nih.gov/genomes/all/GCA/000/688/575/GCA_000688575.1_CavAp1.0
Cavia porcellus	GCA_000151735.1	Cavia porcellus	NC_000884.1	16801	13	https://ftp.ncbi.nlm.nih.gov/genomes/all/GCA/000/151/735/GCA_000151735.1_Cavpor3.0
Cebus albifrons	GCA_004027755.1	Cebus albifrons	NC_002763.1	16554	13	https://ftp.ncbi.nlm.nih.gov/genomes/all/GCA/004/027/755/GCA_004027755.1_CebAlb_v1_BIUU
Ceratotherium simum cottoni	GCA_004027795.1	Ceratotherium simum	NC_001808.1	16832	13	https://ftp.ncbi.nlm.nih.gov/genomes/all/GCA/004/027/795/GCA_004027795.1_CerCot_v1_BIUU
Ceratotherium simum simum	GCA_000283155.1	Ceratotherium simum	NC_001808.1	16832	13	https://ftp.ncbi.nlm.nih.gov/genomes/all/GCA/000/283/155/GCA_000283155.1_CerSimSim1.0
Cercartetus concinnus	GCA_904813675.1	Cercartetus concinnus	KJ868105.1	15372	13	https://ftp.ncbi.nlm.nih.gov/genomes/all/GCA/904/813/675/GCA_904813675.1_ERS5079830_MarsupialExonCaptKit
Cercocebus atys	GCA_000955945.1	Cercocebus atys	NC_028592.1	16543	13	https://ftp.ncbi.nlm.nih.gov/genomes/all/GCA/000/955/945/GCA_000955945.1_Caty_1.0
Cercopithecus mona	GCA_014849445.1	Cercopithecus mona	JQ256979.1	16646	13	https://ftp.ncbi.nlm.nih.gov/genomes/all/GCA/014/849/445/GCA_014849445.1_KIZ_CMon_1.0
Cercopithecus neglectus	GCA_004027615.1	Cercopithecus neglectus	NC_056341.1	16490	13	https://ftp.ncbi.nlm.nih.gov/genomes/all/GCA/004/027/615/GCA_004027615.1_CertNeg_v1_BIUU
Cervus canadensis	GCA_019320065.1	Cervus canadensis	CM033226.1	16429	13	https://ftp.ncbi.nlm.nih.gov/genomes/all/GCA/019/320/065/GCA_019320065.1_ASM1932006v1
Cervus elaphus	GCA_910594005.1	Cervus elaphus	OU343111.1	16353	13	https://ftp.ncbi.nlm.nih.gov/genomes/all/GCA/910/594/005/GCA_910594005.1_mCerEla1.1
Cervus elaphus hippelaphus	GCA_002197005.1	Cervus elaphus	OU343111.1	16353	13	https://ftp.ncbi.nlm.nih.gov/genomes/all/GCA/002/197/005/GCA_002197005.1_CerEla1.0
Chaetophractus vellerosus	GCA_004027955.1	Chaetophractus vellerosus	NC_028561.1	16598	13	https://ftp.ncbi.nlm.nih.gov/genomes/all/GCA/004/027/955/GCA_004027955.1_ChaVel_v1_BIUU
Cheirogaleus medius	GCA_008086735.1	Cheirogaleus medius	NC_021945.1	16804	13	https://ftp.ncbi.nlm.nih.gov/genomes/all/GCA/008/086/735/GCA_008086735.1_ASM808673v1
Chinchilla lanigera	GCA_000276665.1	Chinchilla lanigera	NC_021386.1	16580	13	https://ftp.ncbi.nlm.nih.gov/genomes/all/GCA/000/276/665/GCA_000276665.1_ChiLan1.0
Chlorocebus sabaeus	GCA_015252025.1	Chlorocebus sabaeus	NC_008066.1	16550	13	https://ftp.ncbi.nlm.nih.gov/genomes/all/GCA/015/252/025/GCA_015252025.1_Vero_WHO_p1.0
Choloepus didactylus	GCA_015220235.1	Choloepus didactylus	NC_006924.1	16543	13	https://ftp.ncbi.nlm.nih.gov/genomes/all/GCA/015/220/235/GCA_015220235.1_mChoDid1.pri
Choloepus hoffmanni	GCA_000164785.2	Choloepus hoffmanni	NC_027964.1	16466	13	https://ftp.ncbi.nlm.nih.gov/genomes/all/GCA/000/164/785/GCA_000164785.2_C_hoffmanni-2.0.1
Chrysochloris asiatica	GCA_000296735.1	Chrysochloris asiatica	NC_004920.1	16652	13	https://ftp.ncbi.nlm.nih.gov/genomes/all/GCA/000/296/735/GCA_000296735.1_ChrAsi1.0
Condylura cristata	GCA_000260355.1	Condylura cristata	NC_029762.1	16709	13	https://ftp.ncbi.nlm.nih.gov/genomes/all/GCA/000/260/355/GCA_000260355.1_ConCri1.0
Connochaetes taurinus	GCA_006408615.1	Connochaetes taurinus	NC_020699.1	16410	13	https://ftp.ncbi.nlm.nih.gov/genomes/all/GCA/006/408/615/GCA_006408615.1_BWD
Cricetulus griseus	GCA_000223135.1	Cricetulus griseus	NC_007936.1	16284	13	https://ftp.ncbi.nlm.nih.gov/genomes/all/GCA/000/223/135/GCA_000223135.1_CriGri_1.0
Crocuta crocuta	GCA_008692635.1	Crocuta crocuta	CM018432.1	16858	13	https://ftp.ncbi.nlm.nih.gov/genomes/all/GCA/008/692/635/GCA_008692635.1_BGI_CrCroc_1.0
Cryptoprocta ferox	GCA_004023885.1	Cryptoprocta ferox	NC_053961.1	16862	13	https://ftp.ncbi.nlm.nih.gov/genomes/all/GCA/004/023/885/GCA_004023885.1_CryFer_v1_BIUU
Ctenomys sociabilis	GCA_004027165.1	Ctenomys sociabilis	NC_020658.1	17016	13	https://ftp.ncbi.nlm.nih.gov/genomes/all/GCA/004/027/165/GCA_004027165.1_CteSoc_v1_BIUU
Cynomys gunnisoni	GCA_011316645.1	Cynomys gunnisoni gunnisoni	MG450794.1	16461	13	https://ftp.ncbi.nlm.nih.gov/genomes/all/GCA/011/316/645/GCA_011316645.1_ASM1131664v1
Cynopterus brachyotis	GCA_009793145.1	Cynopterus brachyotis	NC_026465.1	16701	13	https://ftp.ncbi.nlm.nih.gov/genomes/all/GCA/009/793/145/GCA_009793145.1_ASM979314v1
Dactylopsila palpator	GCA_904814155.1	Dactylopsila palpator	KJ868106.1	15385	13	https://ftp.ncbi.nlm.nih.gov/genomes/all/GCA/904/814/155/GCA_904814155.1_ERS5079880_MarsupialExonCaptKit
Dactylopsila trivirgata	GCA_904811055.1	Dactylopsila trivirgata	NC_008134.1	16058	13	https://ftp.ncbi.nlm.nih.gov/genomes/all/GCA/904/811/055/GCA_904811055.1_ERS5079588_MarsupialExonCaptKit
Damaliscus lunatus	GCA_006408505.1	Damaliscus lunatus	NC_023543.1	16419	13	https://ftp.ncbi.nlm.nih.gov/genomes/all/GCA/006/408/505/GCA_006408505.1_CTB
Dasycercus cristicauda	GCA_904813795.1	Dasycercus cristicauda	NC_057634.1	17085	13	https://ftp.ncbi.nlm.nih.gov/genomes/all/GCA/904/813/795/GCA_904813795.1_ERS5079844_MarsupialExonCaptKit
Dasykaluta rosamondae	GCA_904814265.1	Dasykaluta rosamondae	KJ868108.1	15419	13	https://ftp.ncbi.nlm.nih.gov/genomes/all/GCA/904/814/265/GCA_904814265.1_ERS5079897_MarsupialExonCaptKit
Dasypus novemcinctus	GCA_000208655.2	Dasypus novemcinctus	NC_001821.1	17056	13	https://ftp.ncbi.nlm.nih.gov/genomes/all/GCA/000/208/655/GCA_000208655.2_Dasnov3.0
Dasyuroides byrnei	GCA_904810555.1	Dasyuroides byrnei	KJ868109.1	15416	13	https://ftp.ncbi.nlm.nih.gov/genomes/all/GCA/904/810/555/GCA_904810555.1_ERS5079521_MarsupialExonCaptKit
Dasyurus albopunctatus	GCA_904813945.1	Dasyurus albopunctatus	U07580.1	1146	1	https://ftp.ncbi.nlm.nih.gov/genomes/all/GCA/904/813/945/GCA_904813945.1_ERS5079853_MarsupialExonCaptKit
Dasyurus hallucatus	GCA_904813765.1	Dasyurus hallucatus	NC_007630.1	17159	13	https://ftp.ncbi.nlm.nih.gov/genomes/all/GCA/904/813/765/GCA_904813765.1_ERS5079835_MarsupialExonCaptKit
Daubentonia madagascariensis	GCA_004027145.1	Daubentonia madagascariensis	NC_010299.1	16620	13	https://ftp.ncbi.nlm.nih.gov/genomes/all/GCA/004/027/145/GCA_004027145.1_DauMad_v1_BIUU
Delphinapterus leucas	GCA_002288925.3	Delphinapterus leucas	NC_034236.1	16386	13	https://ftp.ncbi.nlm.nih.gov/genomes/all/GCA/002/288/925/GCA_002288925.3_ASM228892v3
Dendrolagus dorianus notatus	GCA_904810745.1	Dendrolagus dorianus	KJ868110.1	16064	13	https://ftp.ncbi.nlm.nih.gov/genomes/all/GCA/904/810/745/GCA_904810745.1_ERS5079541_MarsupialExonCaptKit
Desmodus rotundus	GCA_002940915.2	Desmodus rotundus	NC_022423.1	16659	13	https://ftp.ncbi.nlm.nih.gov/genomes/all/GCA/002/940/915/GCA_002940915.2_ASM294091v2
Dicerorhinus sumatrensis harrissoni	GCA_014189135.1	Dicerorhinus sumatrensis	NC_012684.1	16466	13	https://ftp.ncbi.nlm.nih.gov/genomes/all/GCA/014/189/135/GCA_014189135.1_NRM_Dsumatrensis_v1.fasta
Dicerorhinus sumatrensis sumatrensis	GCA_002844835.1	Dicerorhinus sumatrensis	NC_012684.1	16466	13	https://ftp.ncbi.nlm.nih.gov/genomes/all/GCA/002/844/835/GCA_002844835.1_ASM284483v1
Diceros bicornis	GCA_004027315.2	Diceros bicornis	NC_012682.1	16411	13	https://ftp.ncbi.nlm.nih.gov/genomes/all/GCA/004/027/315/GCA_004027315.2_DicBicMic_v2_BIUU_UCD
Diceros bicornis minor	GCA_013634535.1	Diceros bicornis	NC_012682.1	16411	13	https://ftp.ncbi.nlm.nih.gov/genomes/all/GCA/013/634/535/GCA_013634535.1_ASM1363453v1
Distoechurus pennatus	GCA_904813465.1	Distoechurus pennatus	NC_008145.1	16775	13	https://ftp.ncbi.nlm.nih.gov/genomes/all/GCA/904/813/465/GCA_904813465.1_ERS5079812_MarsupialExonCaptKit
Dorcopsis hageni	GCA_904813935.1	Dorcopsis hageni	KJ868112.1	15378	13	https://ftp.ncbi.nlm.nih.gov/genomes/all/GCA/904/813/935/GCA_904813935.1_ERS5079857_MarsupialExonCaptKit
Dorcopsulus vanheurni	GCA_904813395.1	Dorcopsulus vanheurni	KJ868113.1	16018	13	https://ftp.ncbi.nlm.nih.gov/genomes/all/GCA/904/813/395/GCA_904813395.1_ERS5079802_MarsupialExonCaptKit
Dromiciops gliroides	GCA_019393635.1	Dromiciops gliroides	CM033468.1	17310	13	https://ftp.ncbi.nlm.nih.gov/genomes/all/GCA/019/393/635/GCA_019393635.1_mDroGli1.pri
Dugong dugon	GCA_015147995.1	Dugong dugon	NC_003314.1	16850	13	https://ftp.ncbi.nlm.nih.gov/genomes/all/GCA/015/147/995/GCA_015147995.1_D_dugong_scaffold_01
Echinops telfairi	GCA_000313985.2	Echinops telfairi	NC_002631.2	16549	13	https://ftp.ncbi.nlm.nih.gov/genomes/all/GCA/000/313/985/GCA_000313985.2_ASM31398v2
Echymipera clara	GCA_904812085.1	Echymipera clara	KJ868114.1	15386	13	https://ftp.ncbi.nlm.nih.gov/genomes/all/GCA/904/812/085/GCA_904812085.1_ERS5079574_MarsupialExonCaptKit
Echymipera rufescens	GCA_904811145.1	Echymipera rufescens australis	NC_007632.1	16642	13	https://ftp.ncbi.nlm.nih.gov/genomes/all/GCA/904/811/145/GCA_904811145.1_ERS5079581_MarsupialExonCaptKit
Eidolon helvum	GCA_000465285.1	Eidolon helvum	NC_046903.1	16764	13	https://ftp.ncbi.nlm.nih.gov/genomes/all/GCA/000/465/285/GCA_000465285.1_ASM46528v1
Elaphurus davidianus	GCA_002443075.1	Elaphurus davidianus	NC_018358.1	16355	13	https://ftp.ncbi.nlm.nih.gov/genomes/all/GCA/002/443/075/GCA_002443075.1_Milu1.0
Elephantulus edwardii	GCA_000299155.1	Elephantulus edwardii	NC_041486.1	16552	13	https://ftp.ncbi.nlm.nih.gov/genomes/all/GCA/000/299/155/GCA_000299155.1_EleEdw1.0
Elephas maximus	GCA_014332765.1	Elephas maximus	NC_005129.2	16902	13	https://ftp.ncbi.nlm.nih.gov/genomes/all/GCA/014/332/765/GCA_014332765.1_ASM1433276v1
Ellobius lutescens	GCA_001685075.1	Ellobius lutescens	MT483992.1	16540	13	https://ftp.ncbi.nlm.nih.gov/genomes/all/GCA/001/685/075/GCA_001685075.1_ASM168507v1
Ellobius talpinus	GCA_001685095.1	Ellobius talpinus	NC_054160.1	16367	13	https://ftp.ncbi.nlm.nih.gov/genomes/all/GCA/001/685/095/GCA_001685095.1_ETalpinus_0.1
Enhydra lutris kenyoni	GCA_002288905.2	Enhydra lutris	NC_009692.1	16431	13	https://ftp.ncbi.nlm.nih.gov/genomes/all/GCA/002/288/905/GCA_002288905.2_ASM228890v2
Enhydra lutris nereis	GCA_006410715.1	Enhydra lutris	NC_009692.1	16431	13	https://ftp.ncbi.nlm.nih.gov/genomes/all/GCA/006/410/715/GCA_006410715.1_ASM641071v1
Eonycteris spelaea	GCA_003508835.1	Eonycteris spelaea	NC_046904.1	16700	13	https://ftp.ncbi.nlm.nih.gov/genomes/all/GCA/003/508/835/GCA_003508835.1_Espe.v1
Eptesicus fuscus	GCA_000308155.1	Eptesicus fuscus	MF143474.1	16716	13	https://ftp.ncbi.nlm.nih.gov/genomes/all/GCA/000/308/155/GCA_000308155.1_EptFus1.0
Equus asinus	GCA_016077325.2	Equus asinus	CM027722.2	16680	13	https://ftp.ncbi.nlm.nih.gov/genomes/all/GCA/016/077/325/GCA_016077325.2_ASM1607732v2
Equus asinus asinus	GCA_003033725.1	Equus asinus	CM027722.2	16680	13	https://ftp.ncbi.nlm.nih.gov/genomes/all/GCA/003/033/725/GCA_003033725.1_ASM303372v1
Equus caballus	GCA_002863925.1	Equus caballus	NC_001640.1	16660	13	https://ftp.ncbi.nlm.nih.gov/genomes/all/GCA/002/863/925/GCA_002863925.1_EquCab3.0
Equus przewalskii	GCA_000696695.1	Equus przewalskii	NC_024030.1	16592	13	https://ftp.ncbi.nlm.nih.gov/genomes/all/GCA/000/696/695/GCA_000696695.1_Burgud
Erinaceus europaeus	GCA_000296755.1	Erinaceus europaeus	NC_002080.2	17447	13	https://ftp.ncbi.nlm.nih.gov/genomes/all/GCA/000/296/755/GCA_000296755.1_EriEur2.0
Erythrocebus patas	GCA_004027335.1	Erythrocebus patas	KC757394.1	16676	13	https://ftp.ncbi.nlm.nih.gov/genomes/all/GCA/004/027/335/GCA_004027335.1_EryPat_v1_BIUU
Eschrichtius robustus	GCA_002189225.1	Eschrichtius robustus	NC_005270.1	16412	13	https://ftp.ncbi.nlm.nih.gov/genomes/all/GCA/002/189/225/GCA_002189225.1_ASM218922v1
Eubalaena japonica	GCA_004363455.1	Eubalaena japonica	NC_006931.1	16386	13	https://ftp.ncbi.nlm.nih.gov/genomes/all/GCA/004/363/455/GCA_004363455.1_EubJap_v1_BIUU
Eudorcas thomsonii	GCA_006408755.1	Eudorcas thomsonii	NC_039669.1	16761	13	https://ftp.ncbi.nlm.nih.gov/genomes/all/GCA/006/408/755/GCA_006408755.1_TMG
Eulemur fulvus	GCA_004027275.1	Eulemur fulvus fulvus	NC_012766.1	17126	13	https://ftp.ncbi.nlm.nih.gov/genomes/all/GCA/004/027/275/GCA_004027275.1_EulFul_v1_BIUU
Eulemur macaco	GCA_001262655.1	Eulemur macaco macaco	NC_012771.1	17149	13	https://ftp.ncbi.nlm.nih.gov/genomes/all/GCA/001/262/655/GCA_001262655.1_Emacaco_refEf_BWA_oneround
Eumetopias jubatus	GCA_004028035.1	Eumetopias jubatus	NC_004030.2	16638	13	https://ftp.ncbi.nlm.nih.gov/genomes/all/GCA/004/028/035/GCA_004028035.1_ASM402803v1
Felis catus	GCA_000181335.5	Felis catus	NC_001700.1	17009	13	https://ftp.ncbi.nlm.nih.gov/genomes/all/GCA/000/181/335/GCA_000181335.5_Felis_catus_9.0
Felis chaus	GCA_019924945.1	Felis chaus	CM034436.1	17251	13	https://ftp.ncbi.nlm.nih.gov/genomes/all/GCA/019/924/945/GCA_019924945.1_FelChav1.0
Felis nigripes	GCA_004023925.1	Felis nigripes	NC_028309.1	16723	13	https://ftp.ncbi.nlm.nih.gov/genomes/all/GCA/004/023/925/GCA_004023925.1_FelNig_v1_BIUU
Fukomys damarensis	GCA_012274545.1	Fukomys damarensis	NC_027742.1	16372	13	https://ftp.ncbi.nlm.nih.gov/genomes/all/GCA/012/274/545/GCA_012274545.1_DMR_v1.0_HiC
Galemys pyrenaicus	GCA_019455555.1	Galemys pyrenaicus	NC_008156.1	16510	13	https://ftp.ncbi.nlm.nih.gov/genomes/all/GCA/019/455/555/GCA_019455555.1_Gpyr_1.0
Galeopterus variegatus	GCA_000696425.1	Galeopterus variegatus	NC_004031.1	16748	13	https://ftp.ncbi.nlm.nih.gov/genomes/all/GCA/000/696/425/GCA_000696425.1_G_variegatus-3.0.2
Giraffa camelopardalis	GCA_006408565.1	Giraffa camelopardalis	NC_024820.1	16433	13	https://ftp.ncbi.nlm.nih.gov/genomes/all/GCA/006/408/565/GCA_006408565.1_GFE
Giraffa camelopardalis antiquorum	GCA_018282235.1	Giraffa camelopardalis antiquorum	MT605021.1	16433	13	https://ftp.ncbi.nlm.nih.gov/genomes/all/GCA/018/282/235/GCA_018282235.1_ASM1828223v1
Giraffa camelopardalis rothschildi	GCA_017591445.1	Giraffa camelopardalis	NC_024820.1	16433	13	https://ftp.ncbi.nlm.nih.gov/genomes/all/GCA/017/591/445/GCA_017591445.1_ASM1759144v1
Giraffa tippelskirchi	GCA_013496395.1	Giraffa tippelskirchi	MT605038.1	16431	13	https://ftp.ncbi.nlm.nih.gov/genomes/all/GCA/013/496/395/GCA_013496395.1_ASM1349639v1
Glaucomys volans	GCA_020662805.1	Glaucomys volans	NC_050026.1	16535	13	https://ftp.ncbi.nlm.nih.gov/genomes/all/GCA/020/662/805/GCA_020662805.1_ASM2066280v1
Glis glis	GCA_004027185.1	Glis glis	NC_001892.1	16602	13	https://ftp.ncbi.nlm.nih.gov/genomes/all/GCA/004/027/185/GCA_004027185.1_GliGli_v1_BIUU
Globicephala melas	GCA_006547405.1	Globicephala melas	NC_019441.1	16390	13	https://ftp.ncbi.nlm.nih.gov/genomes/all/GCA/006/547/405/GCA_006547405.1_ASM654740v1
Gorilla gorilla	GCA_900199665.1	Gorilla gorilla	NC_001645.1	16364	13	https://ftp.ncbi.nlm.nih.gov/genomes/all/GCA/900/199/665/GCA_900199665.1_GorY_WUR
Gorilla gorilla gorilla	GCA_008122165.1	Gorilla gorilla gorilla	NC_011120.1	16412	13	https://ftp.ncbi.nlm.nih.gov/genomes/all/GCA/008/122/165/GCA_008122165.1_Kamilah_GGO_v0
Gracilinanus agilis	GCA_016433145.1	Gracilinanus agilis	NC_054268.1	16336	13	https://ftp.ncbi.nlm.nih.gov/genomes/all/GCA/016/433/145/GCA_016433145.1_AgileGrace
Grammomys dolichurus	GCA_019843835.1	Grammomys dolichurus	NC_053797.1	16333	13	https://ftp.ncbi.nlm.nih.gov/genomes/all/GCA/019/843/835/GCA_019843835.1_ASM1984383v1
Grammomys surdaster	GCA_004785775.1	Grammomys surdaster	NC_053796.1	16313	13	https://ftp.ncbi.nlm.nih.gov/genomes/all/GCA/004/785/775/GCA_004785775.1_NIH_TR_1.0
Graphiurus murinus	GCA_004027655.1	Graphiurus murinus	AJ225115.1	1140	1	https://ftp.ncbi.nlm.nih.gov/genomes/all/GCA/004/027/655/GCA_004027655.1_GraMur_v1_BIUU
Gulo gulo	GCA_900006375.2	Gulo gulo	NC_009685.1	16541	13	https://ftp.ncbi.nlm.nih.gov/genomes/all/GCA/900/006/375/GCA_900006375.2_Gulo_2.2_annotated
Gymnobelideus leadbeateri	GCA_011680675.1	Gymnobelideus leadbeateri	NC_053898.1	16812	13	https://ftp.ncbi.nlm.nih.gov/genomes/all/GCA/011/680/675/GCA_011680675.1_LBP_v1
Halichoerus grypus	GCA_012393455.1	Halichoerus grypus	CM022781.1	16773	13	https://ftp.ncbi.nlm.nih.gov/genomes/all/GCA/012/393/455/GCA_012393455.1_Tufts_HGry_1.1
Heterocephalus glaber	GCA_000247695.1	Heterocephalus glaber	NC_015112.1	16386	13	https://ftp.ncbi.nlm.nih.gov/genomes/all/GCA/000/247/695/GCA_000247695.1_HetGla_female_1.0
Hippopotamus amphibius	GCA_004027065.2	Hippopotamus amphibius	NC_000889.1	16407	13	https://ftp.ncbi.nlm.nih.gov/genomes/all/GCA/004/027/065/GCA_004027065.2_HipAmp_v2_BIUU_UCD
Hipposideros armiger	GCA_001890085.1	Hipposideros armiger	NC_018540.1	16784	13	https://ftp.ncbi.nlm.nih.gov/genomes/all/GCA/001/890/085/GCA_001890085.1_ASM189008v1
Hippotragus equinus	GCA_016433095.1	Hippotragus equinus	NC_020712.1	16436	13	https://ftp.ncbi.nlm.nih.gov/genomes/all/GCA/016/433/095/GCA_016433095.1_ASM1643309v1
Hippotragus niger niger	GCA_006942125.1	Hippotragus niger niger	MZ488448.1	16509	13	https://ftp.ncbi.nlm.nih.gov/genomes/all/GCA/006/942/125/GCA_006942125.1_SCBI_HNig_1.0
Homo sapiens	GCA_000001405.28	Homo sapiens	NC_012920.1	16569	13	https://ftp.ncbi.nlm.nih.gov/genomes/all/GCA/000/001/405/GCA_000001405.28_GRCh38.p13
Hyaena hyaena	GCA_003009895.1	Hyaena hyaena	NC_020669.1	17112	13	https://ftp.ncbi.nlm.nih.gov/genomes/all/GCA/003/009/895/GCA_003009895.1_ASM300989v1
Hydrodamalis gigas	GCA_013391785.1	Hydrodamalis gigas	NC_040161.1	16872	13	https://ftp.ncbi.nlm.nih.gov/genomes/all/GCA/013/391/785/GCA_013391785.1_H_Gigas_1.0
Hydropotes inermis	GCA_020226075.1	Hydropotes inermis	NC_011821.1	16355	13	https://ftp.ncbi.nlm.nih.gov/genomes/all/GCA/020/226/075/GCA_020226075.1_ASM2022607v1
Hylobates moloch	GCA_009828535.2	Hylobates moloch	CM020645.1	16501	13	https://ftp.ncbi.nlm.nih.gov/genomes/all/GCA/009/828/535/GCA_009828535.2_HMol_V2/
Hylomyscus alleni	GCA_019843855.1	Hylomyscus alleni	MN845643.1	16246	13	https://ftp.ncbi.nlm.nih.gov/genomes/all/GCA/019/843/855/GCA_019843855.1_ASM1984385v1
Hypsiprymnodon moschatus	GCA_904813425.1	Hypsiprymnodon moschatus	KJ868115.1	15366	13	https://ftp.ncbi.nlm.nih.gov/genomes/all/GCA/904/813/425/GCA_904813425.1_ERS5079805_MarsupialExonCaptKit
Hystrix brachyura	GCA_016801275.1	Hystrix brachyura	NC_050263.1	16833	13	https://ftp.ncbi.nlm.nih.gov/genomes/all/GCA/016/801/275/GCA_016801275.1_DSBC_Hbra_1.0
Ictidomys tridecemlineatus	GCA_016881025.1	Ictidomys tridecemlineatus	NC_027278.1	16458	13	https://ftp.ncbi.nlm.nih.gov/genomes/all/GCA/016/881/025/GCA_016881025.1_HiC_Itri_2
Indri indri	GCA_004363605.1	Indri indri	NC_026095.1	17098	13	https://ftp.ncbi.nlm.nih.gov/genomes/all/GCA/004/363/605/GCA_004363605.1_IndInd_v1_BIUU
Inia geoffrensis	GCA_004363515.1	Inia geoffrensis	NC_005276.1	16588	13	https://ftp.ncbi.nlm.nih.gov/genomes/all/GCA/004/363/515/GCA_004363515.1_IniGeo_v1_BIUU
Isoodon macrourus	GCA_904812175.1	Isoodon macrourus	NC_002746.1	16852	13	https://ftp.ncbi.nlm.nih.gov/genomes/all/GCA/904/812/175/GCA_904812175.1_ERS5079681_MarsupialExonCaptKit
Isoodon macrourus macrourus	GCA_904811065.1	Isoodon macrourus	NC_002746.1	16852	13	https://ftp.ncbi.nlm.nih.gov/genomes/all/GCA/904/811/065/GCA_904811065.1_ERS5079590_MarsupialExonCaptKit
Isoodon obesulus	GCA_904813515.1	Isoodon obesulus	KJ868116.1	15365	13	https://ftp.ncbi.nlm.nih.gov/genomes/all/GCA/904/813/515/GCA_904813515.1_ERS5079816_MarsupialExonCaptKit
Isoodon obesulus affinis	GCA_904812205.1	Isoodon obesulus	KJ868116.1	15365	13	https://ftp.ncbi.nlm.nih.gov/genomes/all/GCA/904/812/205/GCA_904812205.1_ERS5079685_MarsupialExonCaptKit
Isoodon obesulus nauticus	GCA_904811845.1	Isoodon obesulus	KJ868116.1	15365	13	https://ftp.ncbi.nlm.nih.gov/genomes/all/GCA/904/811/845/GCA_904811845.1_ERS5079661_MarsupialExonCaptKit
Isoodon obesulus obesulus	GCA_904813085.1	Isoodon obesulus	KJ868116.1	15365	13	https://ftp.ncbi.nlm.nih.gov/genomes/all/GCA/904/813/085/GCA_904813085.1_ERS5079773_MarsupialExonCaptKit
Isoodon obesulus peninsulae	GCA_904811905.1	Isoodon obesulus	KJ868116.1	15365	13	https://ftp.ncbi.nlm.nih.gov/genomes/all/GCA/904/811/905/GCA_904811905.1_ERS5079667_MarsupialExonCaptKit
Jaculus jaculus	GCA_000280705.1	Jaculus jaculus	NC_005314.1	16546	13	https://ftp.ncbi.nlm.nih.gov/genomes/all/GCA/000/280/705/GCA_000280705.1_JacJac1.0
Kobus ellipsiprymnus	GCA_006410655.1	Kobus ellipsiprymnus	NC_020715.1	16427	13	https://ftp.ncbi.nlm.nih.gov/genomes/all/GCA/006/410/655/GCA_006410655.1_DFW
Kobus leche leche	GCA_014926565.1	Kobus leche	NC_018603.1	16426	13	https://ftp.ncbi.nlm.nih.gov/genomes/all/GCA/014/926/565/GCA_014926565.1_Klec_v1.0
Kogia breviceps	GCA_004363705.1	Kogia breviceps	NC_005272.1	16406	13	https://ftp.ncbi.nlm.nih.gov/genomes/all/GCA/004/363/705/GCA_004363705.1_KogBre_v1_BIUU
Lagenorhynchus obliquidens	GCA_003676395.1	Lagenorhynchus obliquidens	NC_035426.1	16392	13	https://ftp.ncbi.nlm.nih.gov/genomes/all/GCA/003/676/395/GCA_003676395.1_ASM367639v1
Lagorchestes conspicillatus	GCA_904812945.1	Lagorchestes conspicillatus	KY996508.1	16964	13	https://ftp.ncbi.nlm.nih.gov/genomes/all/GCA/904/812/945/GCA_904812945.1_ERS5079762_MarsupialExonCaptKit
Lagorchestes hirsutus	GCA_904812835.1	Lagorchestes hirsutus	NC_008136.1	16889	13	https://ftp.ncbi.nlm.nih.gov/genomes/all/GCA/904/812/835/GCA_904812835.1_ERS5079745_MarsupialExonCaptKit
Lagostrophus fasciatus	GCA_904811075.1	Lagostrophus fasciatus	NC_008447.1	16866	13	https://ftp.ncbi.nlm.nih.gov/genomes/all/GCA/904/811/075/GCA_904811075.1_ERS5079595_MarsupialExonCaptKit
Lama glama chaku	GCA_013239585.1	Lama glama	NC_012102.1	16597	13	https://ftp.ncbi.nlm.nih.gov/genomes/all/GCA/013/239/585/GCA_013239585.1_ASM1323958v1
Lama guanicoe cacsilensis	GCA_013239625.1	Lama guanicoe	NC_011822.1	16649	13	https://ftp.ncbi.nlm.nih.gov/genomes/all/GCA/013/239/625/GCA_013239625.1_ASM1323962v1
Lasiorhinus latifrons	GCA_904813145.1	Lasiorhinus latifrons	U04965.1	90	1	https://ftp.ncbi.nlm.nih.gov/genomes/all/GCA/904/813/145/GCA_904813145.1_ERS5079778_MarsupialExonCaptKit
Lasiurus borealis	GCA_004026805.1	Lasiurus borealis	NC_016873.1	17048	13	https://ftp.ncbi.nlm.nih.gov/genomes/all/GCA/004/026/805/GCA_004026805.1_LasBor_v1_BIUU
Lemur catta	GCA_020740605.1	Lemur catta	CM036502.1	17086	13	https://ftp.ncbi.nlm.nih.gov/genomes/all/GCA/020/740/605/GCA_020740605.1_mLemCat1.pri
Leopardus geoffroyi	GCA_018350155.1	Leopardus geoffroyi	NC_028320.1	16738	13	https://ftp.ncbi.nlm.nih.gov/genomes/all/GCA/018/350/155/GCA_018350155.1_O.geoffroyi_Oge1_pat1.0
Leptonychotes weddellii	GCA_000349705.1	Leptonychotes weddellii	NC_008424.1	16603	13	https://ftp.ncbi.nlm.nih.gov/genomes/all/GCA/000/349/705/GCA_000349705.1_LepWed1.0
Lepus americanus	GCA_004026855.1	Lepus americanus	NC_024043.1	17042	13	https://ftp.ncbi.nlm.nih.gov/genomes/all/GCA/004/026/855/GCA_004026855.1_LepAme_v1_BIUU
Lepus timidus	GCA_009760805.1	Lepus timidus	NC_024040.1	17755	13	https://ftp.ncbi.nlm.nih.gov/genomes/all/GCA/009/760/805/GCA_009760805.1_CIBIO-ISEM_LeTim_1.1
Lipotes vexillifer	GCA_000442215.1	Lipotes vexillifer	NC_007629.1	16392	13	https://ftp.ncbi.nlm.nih.gov/genomes/all/GCA/000/442/215/GCA_000442215.1_Lipotes_vexillifer_v1
Litocranius walleri	GCA_006410535.1	Litocranius walleri	NC_020716.1	16438	13	https://ftp.ncbi.nlm.nih.gov/genomes/all/GCA/006/410/535/GCA_006410535.1_GRK
Lophiomys imhausi	GCA_907164525.1	Lophiomys imhausi	MZ159977.1	16309	13	https://ftp.ncbi.nlm.nih.gov/genomes/all/GCA/907/164/525/GCA_907164525.1_mLopImh1.curated_primary_1811
Loxodonta africana	GCA_000001905.1	Loxodonta africana	NC_000934.1	16866	13	https://ftp.ncbi.nlm.nih.gov/genomes/all/GCA/000/001/905/GCA_000001905.1_Loxafr3.0
Lutra lutra	GCA_902655055.2	Lutra lutra	LR822067.1	16536	13	https://ftp.ncbi.nlm.nih.gov/genomes/all/GCA/902/655/055/GCA_902655055.2_mLutLut1.2
Lycaon pictus	GCA_004216515.1	Lycaon pictus	NC_028427.1	16173	13	https://ftp.ncbi.nlm.nih.gov/genomes/all/GCA/004/216/515/GCA_004216515.1_sis1-161031-pseudohap
Lynx canadensis	GCA_007474595.2	Lynx canadensis	CM017348.2	17044	13	https://ftp.ncbi.nlm.nih.gov/genomes/all/GCA/007/474/595/GCA_007474595.2_mLynCan4.pri.v2
Lynx pardinus	GCA_900661375.1	Lynx pardinus	NC_028319.1	16806	13	https://ftp.ncbi.nlm.nih.gov/genomes/all/GCA/900/661/375/GCA_900661375.1_LYPA1.0
Macaca fascicularis	GCA_000364345.1	Macaca fascicularis	NC_012670.1	16575	13	https://ftp.ncbi.nlm.nih.gov/genomes/all/GCA/000/364/345/GCA_000364345.1_Macaca_fascicularis_5.0
Macaca fuscata fuscata	GCA_003118495.1	Macaca fuscata	NC_025513.1	16565	13	https://ftp.ncbi.nlm.nih.gov/genomes/all/GCA/003/118/495/GCA_003118495.1_macFus_1.0
Macaca mulatta	GCA_003339765.3	Macaca mulatta	NC_005943.1	16564	13	https://ftp.ncbi.nlm.nih.gov/genomes/all/GCA/003/339/765/GCA_003339765.3_Mmul_10
Macaca nemestrina	GCA_000956065.1	Macaca nemestrina	NC_026976.1	16560	13	https://ftp.ncbi.nlm.nih.gov/genomes/all/GCA/000/956/065/GCA_000956065.1_Mnem_1.0
Macroglossus sobrinus	GCA_004027375.1	Macroglossus sobrinus	NC_046914.1	16415	13	https://ftp.ncbi.nlm.nih.gov/genomes/all/GCA/004/027/375/GCA_004027375.1_MacSob_v1_BIUU
Macropus eugenii	GCA_000004035.1	Macropus eugenii	KJ868119.1	16865	13	https://ftp.ncbi.nlm.nih.gov/genomes/all/GCA/000/004/035/GCA_000004035.1_Meug_1.1
Macropus fuliginosus	GCA_904811135.1	Macropus fuliginosus	NC_039717.1	16881	13	https://ftp.ncbi.nlm.nih.gov/genomes/all/GCA/904/811/135/GCA_904811135.1_ERS5079586_MarsupialExonCaptKit
Macropus giganteus	GCA_904810925.1	Macropus giganteus	NC_027424.1	16887	13	https://ftp.ncbi.nlm.nih.gov/genomes/all/GCA/904/810/925/GCA_904810925.1_ERS5079556_MarsupialExonCaptKit
Macrotis lagotis	GCA_904813115.1	Macrotis lagotis	NC_006520.1	15289	13	https://ftp.ncbi.nlm.nih.gov/genomes/all/GCA/904/813/115/GCA_904813115.1_ERS5079777_MarsupialExonCaptKit
Macrotus californicus	GCA_007922815.1	Macrotus californicus	NC_037136.1	16691	13	https://ftp.ncbi.nlm.nih.gov/genomes/all/GCA/007/922/815/GCA_007922815.1_MacCal_v1_BIUU
Madoqua kirkii	GCA_006408675.1	Madoqua kirkii	NC_020717.1	16468	13	https://ftp.ncbi.nlm.nih.gov/genomes/all/GCA/006/408/675/GCA_006408675.1_KDD
Mandrillus leucophaeus	GCA_000951045.1	Mandrillus leucophaeus	NC_028442.1	16547	13	https://ftp.ncbi.nlm.nih.gov/genomes/all/GCA/000/951/045/GCA_000951045.1_Mleu.le_1.0
Mandrillus sphinx	GCA_004802615.1	Mandrillus sphinx	KC757403.1	16546	13	https://ftp.ncbi.nlm.nih.gov/genomes/all/GCA/004/802/615/GCA_004802615.1_BGI_mandrill_1.0
Manis crassicaudata	GCA_016801295.1	Manis crassicaudata	NC_036433.1	16576	13	https://ftp.ncbi.nlm.nih.gov/genomes/all/GCA/016/801/295/GCA_016801295.1_DSBC_Mcra_1.0
Manis javanica	GCA_014570535.1	Manis javanica	NC_026781.1	16576	13	https://ftp.ncbi.nlm.nih.gov/genomes/all/GCA/014/570/535/GCA_014570535.1_YNU_ManJav_2.0
Manis pentadactyla	GCA_014570555.1	Manis pentadactyla	NC_016008.1	16578	13	https://ftp.ncbi.nlm.nih.gov/genomes/all/GCA/014/570/555/GCA_014570555.1_YNU_ManPten_2.0
Marmota flaviventris	GCA_003676075.2	Marmota flaviventris	NC_042243.1	16438	13	https://ftp.ncbi.nlm.nih.gov/genomes/all/GCA/003/676/075/GCA_003676075.2_GSC_YBM_2.0
Marmota himalayana	GCA_005280165.1	Marmota himalayana	NC_018367.1	16443	13	https://ftp.ncbi.nlm.nih.gov/genomes/all/GCA/005/280/165/GCA_005280165.1_ASM528016v1
Marmota marmota marmota	GCA_001458135.2	Marmota marmota marmota	MN935776.1	16434	13	https://ftp.ncbi.nlm.nih.gov/genomes/all/GCA/001/458/135/GCA_001458135.2_marMar
Marmota monax	GCA_014533835.1	Marmota monax	CM025523.1	16440	13	https://ftp.ncbi.nlm.nih.gov/genomes/all/GCA/014/533/835/GCA_014533835.1_Woodchuck_1.0
Marmota vancouverensis	GCA_005458795.1	Marmota vancouverensis	NC_048490.1	16435	13	https://ftp.ncbi.nlm.nih.gov/genomes/all/GCA/005/458/795/GCA_005458795.1_GSC_VIM_1.0
Martes zibellina	GCA_012583365.1	Martes zibellina	NC_011579.1	16523	13	https://ftp.ncbi.nlm.nih.gov/genomes/all/GCA/012/583/365/GCA_012583365.1_ASM1258336v1
Mastomys coucha	GCA_008632895.1	Mastomys coucha	NC_036018.1	16216	13	https://ftp.ncbi.nlm.nih.gov/genomes/all/GCA/008/632/895/GCA_008632895.1_UCSF_Mcou_1
Mastomys natalensis	GCA_019843795.1	Mastomys natalensis	NC_036995.1	16215	13	https://ftp.ncbi.nlm.nih.gov/genomes/all/GCA/019/843/795/GCA_019843795.1_ASM1984379v1
Megaptera novaeangliae	GCA_004329385.1	Megaptera novaeangliae	NC_006927.1	16398	13	https://ftp.ncbi.nlm.nih.gov/genomes/all/GCA/004/329/385/GCA_004329385.1_megNov1
Mellivora capensis	GCA_004024625.1	Mellivora capensis	NC_053981.1	16579	13	https://ftp.ncbi.nlm.nih.gov/genomes/all/GCA/004/024/625/GCA_004024625.1_MelCap_v1_BIUU
Meriones unguiculatus	GCA_002204375.1	Meriones unguiculatus	NC_023263.1	16351	13	https://ftp.ncbi.nlm.nih.gov/genomes/all/GCA/002/204/375/GCA_002204375.1_MunDraft-v1.0
Mesocricetus auratus	GCA_017639785.1	Mesocricetus auratus	NC_013276.1	16264	13	https://ftp.ncbi.nlm.nih.gov/genomes/all/GCA/017/639/785/GCA_017639785.1_BCM_Maur_2.0
Mesoplodon bidens	GCA_004027085.1	Mesoplodon bidens	NC_042218.1	16347	13	https://ftp.ncbi.nlm.nih.gov/genomes/all/GCA/004/027/085/GCA_004027085.1_MesBid_v1_BIUU
Microcebus griseorufus	GCA_008750995.1	Microcebus griseorufus	NC_035558.1	16719	13	https://ftp.ncbi.nlm.nih.gov/genomes/all/GCA/008/750/995/GCA_008750995.1_Mgri_1.0
Microcebus mittermeieri	GCA_008750955.1	Microcebus mittermeieri	NC_035563.1	16687	13	https://ftp.ncbi.nlm.nih.gov/genomes/all/GCA/008/750/955/GCA_008750955.1_Mmit_1.0
Microcebus murinus	GCA_000165445.3	Microcebus murinus	NC_028718.1	17114	13	https://ftp.ncbi.nlm.nih.gov/genomes/all/GCA/000/165/445/GCA_000165445.3_Mmur_3.0
Microcebus ravelobensis	GCA_008750975.1	Microcebus ravelobensis	NC_035556.1	16652	13	https://ftp.ncbi.nlm.nih.gov/genomes/all/GCA/008/750/975/GCA_008750975.1_Mrav_1.0
Microcebus tavaratra	GCA_008750935.1	Microcebus tavaratra	NC_035560.1	16646	13	https://ftp.ncbi.nlm.nih.gov/genomes/all/GCA/008/750/935/GCA_008750935.1_Mtav_1.0
Microperoryctes longicauda	GCA_904812025.1	Microperoryctes longicauda	KJ868126.1	15380	13	https://ftp.ncbi.nlm.nih.gov/genomes/all/GCA/904/812/025/GCA_904812025.1_ERS5079575_MarsupialExonCaptKit
Microperoryctes longicauda magnus	GCA_904814325.1	Microperoryctes longicauda	KJ868126.1	15380	13	https://ftp.ncbi.nlm.nih.gov/genomes/all/GCA/904/814/325/GCA_904814325.1_ERS5079888_MarsupialExonCaptKit
Microtus agrestis	GCA_902806775.1	Microtus agrestis	NC_041250.1	16297	13	https://ftp.ncbi.nlm.nih.gov/genomes/all/GCA/902/806/775/GCA_902806775.1_Field_vole_promethion_pilon
Microtus arvalis	GCA_007455615.1	Microtus arvalis	NC_038176.1	16285	13	https://ftp.ncbi.nlm.nih.gov/genomes/all/GCA/007/455/615/GCA_007455615.1_ASM745561v1
Microtus fortis	GCA_014885135.1	Microtus fortis fortis	NC_015241.1	16310	13	https://ftp.ncbi.nlm.nih.gov/genomes/all/GCA/014/885/135/GCA_014885135.1_M_Fortis_MF-2015_v1
Microtus ochrogaster	GCA_000317375.1	Microtus ochrogaster	NC_027945.1	16292	13	https://ftp.ncbi.nlm.nih.gov/genomes/all/GCA/000/317/375/GCA_000317375.1_MicOch1.0
Microtus oeconomus	GCA_007455595.1	Microtus oeconomus	AB372193.1	1143	1	https://ftp.ncbi.nlm.nih.gov/genomes/all/GCA/007/455/595/GCA_007455595.1_ASM745559v1
Microtus richardsoni	GCA_019206885.1	Microtus richardsoni	NC_049220.1	16285	13	https://ftp.ncbi.nlm.nih.gov/genomes/all/GCA/019/206/885/GCA_019206885.1_ASM1920688v1
Microtus richardsoni arvicoloides	GCA_020387435.1	Microtus richardsoni	NC_049220.1	16285	13	https://ftp.ncbi.nlm.nih.gov/genomes/all/GCA/020/387/435/GCA_020387435.1_ASM2038743v1
Miniopterus schreibersii	GCA_004026525.1	Miniopterus schreibersii	AB444719.1	1140	1	https://ftp.ncbi.nlm.nih.gov/genomes/all/GCA/004/026/525/GCA_004026525.1_MinSch_v1_BIUU
Mirounga leonina	GCA_011800145.1	Mirounga leonina	NC_008422.1	16970	13	https://ftp.ncbi.nlm.nih.gov/genomes/all/GCA/011/800/145/GCA_011800145.1_KU_Mleo_1.0
Mirza coquereli	GCA_004024645.1	Mirza coquereli	NC_035656.1	17066	13	https://ftp.ncbi.nlm.nih.gov/genomes/all/GCA/004/024/645/GCA_004024645.1_MizCoq_v1_BIUU
Mirza zaza	GCA_008750895.1	Mirza zaza	NC_035606.1	16777	13	https://ftp.ncbi.nlm.nih.gov/genomes/all/GCA/008/750/895/GCA_008750895.1_Mzaz_1.0
Molossus molossus	GCA_014108415.1	Molossus molossus	CM024385.1	16612	13	https://ftp.ncbi.nlm.nih.gov/genomes/all/GCA/014/108/415/GCA_014108415.1_mMolMol1.p
Monodelphis domestica	GCA_000002295.1	Monodelphis domestica	NC_006299.1	17079	13	https://ftp.ncbi.nlm.nih.gov/genomes/all/GCA/000/002/295/GCA_000002295.1_ASM229v1
Monodon monoceros	GCA_005190385.2	Monodon monoceros	CM016494.1	16363	13	https://ftp.ncbi.nlm.nih.gov/genomes/all/GCA/005/190/385/GCA_005190385.2_NGI_Narwhal_1
Moschus berezovskii	GCA_006459085.1	Moschus berezovskii	NC_012694.1	16354	13	https://ftp.ncbi.nlm.nih.gov/genomes/all/GCA/006/459/085/GCA_006459085.1_FMD
Moschus chrysogaster	GCA_006461725.1	Moschus chrysogaster	NC_020093.1	16353	13	https://ftp.ncbi.nlm.nih.gov/genomes/all/GCA/006/461/725/GCA_006461725.1_NPU_MCHR_1.0
Moschus moschiferus	GCA_004024705.2	Moschus moschiferus	NC_013753.1	16351	13	https://ftp.ncbi.nlm.nih.gov/genomes/all/GCA/004/024/705/GCA_004024705.2_MosMos_v2_BIUU_UCD
Mungos mungo	GCA_004023785.1	Mungos mungo	NC_053963.1	16663	13	https://ftp.ncbi.nlm.nih.gov/genomes/all/GCA/004/023/785/GCA_004023785.1_MunMun_v1_BIUU
Muntiacus crinifrons	GCA_020276665.1	Muntiacus crinifrons	NC_004577.1	16357	13	https://ftp.ncbi.nlm.nih.gov/genomes/all/GCA/020/276/665/GCA_020276665.1_ASM2027666v1
Muntiacus gongshanensis	GCA_020226025.1	Muntiacus gongshanensis	NC_048506.1	16356	13	https://ftp.ncbi.nlm.nih.gov/genomes/all/GCA/020/226/025/GCA_020226025.1_ASM2022602v1
Muntiacus muntjak	GCA_008782695.1	Muntiacus muntjak	NC_004563.1	16354	13	https://ftp.ncbi.nlm.nih.gov/genomes/all/GCA/008/782/695/GCA_008782695.1_UCB_Mmun_1.0
Muntiacus reevesi	GCA_020226045.1	Muntiacus reevesi	NC_004069.1	16354	13	https://ftp.ncbi.nlm.nih.gov/genomes/all/GCA/020/226/045/GCA_020226045.1_ASM2022604v1
Murexia longicaudata	GCA_904811165.1	Murexia longicaudata	KJ868128.1	15371	13	https://ftp.ncbi.nlm.nih.gov/genomes/all/GCA/904/811/165/GCA_904811165.1_ERS5079578_MarsupialExonCaptKit
Murexia melanurus	GCA_904810885.1	Murexia melanurus	NC_045217.1	17736	13	https://ftp.ncbi.nlm.nih.gov/genomes/all/GCA/904/810/885/GCA_904810885.1_ERS5079550_MarsupialExonCaptKit
Murexia rothschildi	GCA_904813965.1	Murexia rothschildi	U07583.1	1146	1	https://ftp.ncbi.nlm.nih.gov/genomes/all/GCA/904/813/965/GCA_904813965.1_ERS5079862_MarsupialExonCaptKit
Mus caroli	GCA_900094665.2	Mus caroli	NC_025268.1	16313	13	https://ftp.ncbi.nlm.nih.gov/genomes/all/GCA/900/094/665/GCA_900094665.2_CAROLI_EIJ_v1.1
Mus musculus	GCA_000185125.1	Mus musculus	NC_005089.1	16299	13	https://ftp.ncbi.nlm.nih.gov/genomes/all/GCA/000/185/125/GCA_000185125.1_MmusSOAP1
Mus musculus castaneus	GCA_001624445.1	Mus musculus castaneus	CM004181.1	16299	13	https://ftp.ncbi.nlm.nih.gov/genomes/all/GCA/001/624/445/GCA_001624445.1_CAST_EiJ_v1
Mus musculus domesticus	GCA_001624835.1	Mus musculus domesticus	CM004189.1	16301	13	https://ftp.ncbi.nlm.nih.gov/genomes/all/GCA/001/624/835/GCA_001624835.1_WSB_EiJ_v1
Mus musculus musculus	GCA_001624775.1	Mus musculus musculus	CM004187.1	16301	13	https://ftp.ncbi.nlm.nih.gov/genomes/all/GCA/001/624/775/GCA_001624775.1_PWK_PhJ_v1
Mus pahari	GCA_900095145.2	Mus pahari	NC_036680.1	16286	13	https://ftp.ncbi.nlm.nih.gov/genomes/all/GCA/900/095/145/GCA_900095145.2_PAHARI_EIJ_v1.1
Mus spicilegus	GCA_003336285.1	Mus spicilegus	AB125775.1	1140	1	https://ftp.ncbi.nlm.nih.gov/genomes/all/GCA/003/336/285/GCA_003336285.1_MUSP714
Mus spretus	GCA_001624865.1	Mus spretus	CM004188.1	16303	13	https://ftp.ncbi.nlm.nih.gov/genomes/all/GCA/001/624/865/GCA_001624865.1_SPRET_EiJ_v1
Muscardinus avellanarius	GCA_004027005.1	Muscardinus avellanarius	NC_050264.1	16731	13	https://ftp.ncbi.nlm.nih.gov/genomes/all/GCA/004/027/005/GCA_004027005.1_MusAve_v1_BIUU
Mustela erminea	GCA_009829155.1	Mustela erminea	NC_025516.1	16471	13	https://ftp.ncbi.nlm.nih.gov/genomes/all/GCA/009/829/155/GCA_009829155.1_mMusErm1.Pri
Mustela nivalis	GCA_019141155.1	Mustela nivalis	CM032670.1	16480	13	https://ftp.ncbi.nlm.nih.gov/genomes/all/GCA/019/141/155/GCA_019141155.1_MusNiv_Pri1.0
Mustela putorius	GCA_902460245.1	Mustela putorius	NC_020638.1	16523	13	https://ftp.ncbi.nlm.nih.gov/genomes/all/GCA/902/460/245/GCA_902460245.1_polecat_w2rap_lmp_bionano_10x_
Mustela putorius furo	GCA_000215625.1	Mustela putorius furo	KT693383.1	16525	13	https://ftp.ncbi.nlm.nih.gov/genomes/all/GCA/000/215/625/GCA_000215625.1_MusPutFur1.0
Myocastor coypus	GCA_004027025.1	Myocastor coypus	NC_035866.1	16874	13	https://ftp.ncbi.nlm.nih.gov/genomes/all/GCA/004/027/025/GCA_004027025.1_MyoCoy_v1_BIUU
Myodes glareolus	GCA_004368595.1	Myodes glareolus	CM015301.1	16354	13	https://ftp.ncbi.nlm.nih.gov/genomes/all/GCA/004/368/595/GCA_004368595.1_ASM436859v1
Myoictis wavicus	GCA_904813975.1	Myoictis wavicus	KJ868129.1	15388	13	https://ftp.ncbi.nlm.nih.gov/genomes/all/GCA/904/813/975/GCA_904813975.1_ERS5079861_MarsupialExonCaptKit
Myotis brandtii	GCA_000412655.1	Myotis brandtii	NC_025308.1	17470	13	https://ftp.ncbi.nlm.nih.gov/genomes/all/GCA/000/412/655/GCA_000412655.1_ASM41265v1
Myotis davidii	GCA_000327345.1	Myotis davidii	NC_025568.1	17531	13	https://ftp.ncbi.nlm.nih.gov/genomes/all/GCA/000/327/345/GCA_000327345.1_ASM32734v1
Myotis lucifugus	GCA_000147115.1	Myotis lucifugus	NC_029849.1	17038	13	https://ftp.ncbi.nlm.nih.gov/genomes/all/GCA/000/147/115/GCA_000147115.1_Myoluc2.0
Myotis myotis	GCA_014108235.1	Myotis myotis	NC_029346.1	17213	13	https://ftp.ncbi.nlm.nih.gov/genomes/all/GCA/014/108/235/GCA_014108235.1_mMyoMyo1.p
Myrmecobius fasciatus	GCA_904813275.1	Myrmecobius fasciatus	NC_011949.1	16813	13	https://ftp.ncbi.nlm.nih.gov/genomes/all/GCA/904/813/275/GCA_904813275.1_ERS5079787_MarsupialExonCaptKit
Myrmecophaga tridactyla	GCA_004026745.1	Myrmecophaga tridactyla	NC_028572.1	16498	13	https://ftp.ncbi.nlm.nih.gov/genomes/all/GCA/004/026/745/GCA_004026745.1_MyrTri_v1_BIUU
Nanger dama ruficollis	GCA_019969365.1	Nanger dama	NC_020724.1	16377	13	https://ftp.ncbi.nlm.nih.gov/genomes/all/GCA/019/969/365/GCA_019969365.1_SCBI_Ndam_1.0
Nanger granti	GCA_006408635.1	Nanger granti	NC_020725.1	16381	13	https://ftp.ncbi.nlm.nih.gov/genomes/all/GCA/006/408/635/GCA_006408635.1_GTG
Nannospalax galili	GCA_000622305.1	Nannospalax galili	NC_020754.1	16409	13	https://ftp.ncbi.nlm.nih.gov/genomes/all/GCA/000/622/305/GCA_000622305.1_S.galili_v1.0
Nasalis larvatus	GCA_000772465.1	Nasalis larvatus	NC_008216.1	16570	13	https://ftp.ncbi.nlm.nih.gov/genomes/all/GCA/000/772/465/GCA_000772465.1_Charlie1.0
Neomonachus schauinslandi	GCA_002201575.2	Neomonachus schauinslandi	CM035914.1	16648	13	https://ftp.ncbi.nlm.nih.gov/genomes/all/GCA/002/201/575/GCA_002201575.2_ASM220157v2
Neophascogale lorentzii	GCA_904810695.1	Neophascogale lorentzii	KJ868130.1	19884	13	https://ftp.ncbi.nlm.nih.gov/genomes/all/GCA/904/810/695/GCA_904810695.1_ERS5079528_MarsupialExonCaptKit
Neophocaena asiaeorientalis asiaeorientalis	GCA_003031525.2	Neophocaena asiaeorientalis asiaeorientalis	KR108308.1	16386	13	https://ftp.ncbi.nlm.nih.gov/genomes/all/GCA/003/031/525/GCA_003031525.2_Neophocaena_asiaeorientalis_V1
Neotragus moschatus	GCA_006410615.1	Neotragus moschatus	NC_020728.1	16399	13	https://ftp.ncbi.nlm.nih.gov/genomes/all/GCA/006/410/615/GCA_006410615.1_SUN
Neovison vison	GCA_020171115.1	Neovison vison	NC_020641.1	16552	13	https://ftp.ncbi.nlm.nih.gov/genomes/all/GCA/020/171/115/GCA_020171115.1_ASM_NN_V1
Ningaui ridei	GCA_904814305.1	Ningaui ridei	KJ868131.1	15514	13	https://ftp.ncbi.nlm.nih.gov/genomes/all/GCA/904/814/305/GCA_904814305.1_ERS5079898_MarsupialExonCaptKit
Ningaui yvonnae	GCA_904813685.1	Ningaui yvonnae	U07587.1	1146	1	https://ftp.ncbi.nlm.nih.gov/genomes/all/GCA/904/813/685/GCA_904813685.1_ERS5079832_MarsupialExonCaptKit
Noctilio leporinus	GCA_004026585.1	Noctilio leporinus	NC_037137.1	16659	13	https://ftp.ncbi.nlm.nih.gov/genomes/all/GCA/004/026/585/GCA_004026585.1_NocLep_v1_BIUU
Nomascus leucogenys	GCA_006542625.1	Nomascus leucogenys	NC_021957.1	16478	13	https://ftp.ncbi.nlm.nih.gov/genomes/all/GCA/006/542/625/GCA_006542625.1_Asia_NLE_v1
Notamacropus agilis	GCA_904814285.1	Notamacropus agilis	KY996507.1	17111	13	https://ftp.ncbi.nlm.nih.gov/genomes/all/GCA/904/814/285/GCA_904814285.1_ERS5079889_MarsupialExonCaptKit
Notamacropus eugenii derbianus	GCA_904811105.1	Notamacropus eugenii	MZ595099.1	16216	13	https://ftp.ncbi.nlm.nih.gov/genomes/all/GCA/904/811/105/GCA_904811105.1_ERS5079594_MarsupialExonCaptKit
Notamacropus eugenii eugenii	GCA_904811045.1	Notamacropus eugenii	MZ595099.1	16216	13	https://ftp.ncbi.nlm.nih.gov/genomes/all/GCA/904/811/045/GCA_904811045.1_ERS5079585_MarsupialExonCaptKit
Notamacropus irma	GCA_904814355.1	Notamacropus irma	KY996503.1	17132	13	https://ftp.ncbi.nlm.nih.gov/genomes/all/GCA/904/814/355/GCA_904814355.1_ERS5079900_MarsupialExonCaptKit
Notamacropus rufogriseus banksianus	GCA_904811085.1	Notamacropus rufogriseus	KY996499.1	17047	13	https://ftp.ncbi.nlm.nih.gov/genomes/all/GCA/904/811/085/GCA_904811085.1_ERS5079587_MarsupialExonCaptKit
Notamacropus rufogriseus rufogriseus	GCA_904810775.1	Notamacropus rufogriseus	KY996499.1	17047	13	https://ftp.ncbi.nlm.nih.gov/genomes/all/GCA/904/810/775/GCA_904810775.1_ERS5079538_MarsupialExonCaptKit
Notoryctes caurinus	GCA_904811115.1	Notoryctes caurinus	KJ868132.1	15490	13	https://ftp.ncbi.nlm.nih.gov/genomes/all/GCA/904/811/115/GCA_904811115.1_ERS5079589_MarsupialExonCaptKit
Notoryctes typhlops	GCA_904813125.1	Notoryctes typhlops	NC_006522.1	15923	13	https://ftp.ncbi.nlm.nih.gov/genomes/all/GCA/904/813/125/GCA_904813125.1_ERS5079776_MarsupialExonCaptKit
Nyctereutes procyonoides	GCA_905146905.1	Nyctereutes procyonoides	NC_013700.1	16713	13	https://ftp.ncbi.nlm.nih.gov/genomes/all/GCA/905/146/905/GCA_905146905.1_NYPRO_anot_genome
Nycticebus coucang	GCA_004027815.1	Nycticebus coucang	NC_002765.1	16764	13	https://ftp.ncbi.nlm.nih.gov/genomes/all/GCA/004/027/815/GCA_004027815.1_NycCou_v1_BIUU
Nycticeius humeralis	GCA_007922795.1	Nycticeius humeralis	L19727.1	528	1	https://ftp.ncbi.nlm.nih.gov/genomes/all/GCA/007/922/795/GCA_007922795.1_NycHum_v1_BIUU
Ochotona curzoniae	GCA_017591425.1	Ochotona curzoniae	NC_011029.1	17131	13	https://ftp.ncbi.nlm.nih.gov/genomes/all/GCA/017/591/425/GCA_017591425.1_NIBS_Ocur_1.0
Ochotona princeps	GCA_014633375.1	Ochotona princeps	NC_005358.1	16481	13	https://ftp.ncbi.nlm.nih.gov/genomes/all/GCA/014/633/375/GCA_014633375.1_OchPri4.0
Octodon degus	GCA_000260255.1	Octodon degus	NC_020661.1	16798	13	https://ftp.ncbi.nlm.nih.gov/genomes/all/GCA/000/260/255/GCA_000260255.1_OctDeg1.0
Odobenus rosmarus divergens	GCA_000321225.1	Odobenus rosmarus	U12849.1	376	1	https://ftp.ncbi.nlm.nih.gov/genomes/all/GCA/000/321/225/GCA_000321225.1_Oros_1.0
Odocoileus hemionus hemionus	GCA_004115125.1	Odocoileus hemionus hemionus	CM014077.1	16477	13	https://ftp.ncbi.nlm.nih.gov/genomes/all/GCA/004/115/125/GCA_004115125.1_UofA_Ohem_1.0
Odocoileus hemionus sitkensis	GCA_003697985.1	Odocoileus hemionus	JN632670.1	16482	13	https://ftp.ncbi.nlm.nih.gov/genomes/all/GCA/003/697/985/GCA_003697985.1_ASM369798v1
Odocoileus virginianus	GCA_014726795.1	Odocoileus virginianus	NC_015247.1	16477	13	https://ftp.ncbi.nlm.nih.gov/genomes/all/GCA/014/726/795/GCA_014726795.1_Odo_v1
Odocoileus virginianus texanus	GCA_002102435.1	Odocoileus virginianus	NC_015247.1	16477	13	https://ftp.ncbi.nlm.nih.gov/genomes/all/GCA/002/102/435/GCA_002102435.1_Ovir.te_1.0
Okapia johnstoni	GCA_001660835.1	Okapia johnstoni	NC_020730.1	16422	13	https://ftp.ncbi.nlm.nih.gov/genomes/all/GCA/001/660/835/GCA_001660835.1_ASM166083v1
Ondatra zibethicus	GCA_004026605.1	Ondatra zibethicus	NC_036035.1	16348	13	https://ftp.ncbi.nlm.nih.gov/genomes/all/GCA/004/026/605/GCA_004026605.1_OndZib_v1_BIUU
Onychogalea unguifera	GCA_904810985.1	Onychogalea unguifera	KJ868133.1	16847	13	https://ftp.ncbi.nlm.nih.gov/genomes/all/GCA/904/810/985/GCA_904810985.1_ERS5079579_MarsupialExonCaptKit
Orcinus orca	GCA_000331955.2	Orcinus orca	NC_023889.1	16386	13	https://ftp.ncbi.nlm.nih.gov/genomes/all/GCA/000/331/955/GCA_000331955.2_Oorc_1.1
Oreamnos americanus	GCA_009758055.1	Oreamnos americanus	NC_020630.1	16604	13	https://ftp.ncbi.nlm.nih.gov/genomes/all/GCA/009/758/055/GCA_009758055.1_ASM975805v1
Oreotragus oreotragus	GCA_006410675.1	Oreotragus oreotragus	JN632675.1	16526	13	https://ftp.ncbi.nlm.nih.gov/genomes/all/GCA/006/410/675/GCA_006410675.1_KSP
Ornithorhynchus anatinus	GCA_004115215.4	Ornithorhynchus anatinus	NC_000891.1	17019	13	https://ftp.ncbi.nlm.nih.gov/genomes/all/GCA/004/115/215/GCA_004115215.4_mOrnAna1.pri.v4
Orycteropus afer	GCA_004365145.1	Orycteropus afer	NC_002078.1	16816	13	https://ftp.ncbi.nlm.nih.gov/genomes/all/GCA/004/365/145/GCA_004365145.1_OryAfe_v1_BIUU
Orycteropus afer afer	GCA_000298275.1	Orycteropus afer	NC_002078.1	16816	13	https://ftp.ncbi.nlm.nih.gov/genomes/all/GCA/000/298/275/GCA_000298275.1_OryAfe1.0
Oryctolagus cuniculus	GCA_009806435.2	Oryctolagus cuniculus	NC_001913.1	17245	13	https://ftp.ncbi.nlm.nih.gov/genomes/all/GCA/009/806/435/GCA_009806435.2_UM_NZW_1.0
Oryctolagus cuniculus cuniculus	GCA_013371645.1	Oryctolagus cuniculus	NC_001913.1	17245	13	https://ftp.ncbi.nlm.nih.gov/genomes/all/GCA/013/371/645/GCA_013371645.1_OryCun3.0
Oryx dammah	GCA_014754425.2	Oryx dammah	NC_058019.1	16689	13	https://ftp.ncbi.nlm.nih.gov/genomes/all/GCA/014/754/425/GCA_014754425.2_SCBI_Odam_1.1
Oryx gazella	GCA_003945745.1	Oryx gazella	NC_016422.1	16661	13	https://ftp.ncbi.nlm.nih.gov/genomes/all/GCA/003/945/745/GCA_003945745.1_UCDavis_Ogaz_1
Otocyon megalotis megalotis	GCA_017311455.1	Otocyon megalotis	NC_036369.1	16431	13	https://ftp.ncbi.nlm.nih.gov/genomes/all/GCA/017/311/455/GCA_017311455.1_Otocyon_megalotis_TS305_17_09_2019
Ourebia ourebi	GCA_006417275.1	Ourebia ourebi	NC_020733.1	16392	13	https://ftp.ncbi.nlm.nih.gov/genomes/all/GCA/006/417/275/GCA_006417275.1_ORB
Ovis ammon	GCA_003121645.1	Ovis ammon	NC_020656.1	16613	13	https://ftp.ncbi.nlm.nih.gov/genomes/all/GCA/003/121/645/GCA_003121645.1_O_ammon_KGZ_v1.0
Ovis aries	GCA_016772045.1	Ovis aries	NC_001941.1	16616	13	https://ftp.ncbi.nlm.nih.gov/genomes/all/GCA/016/772/045/GCA_016772045.1_ARS-UI_Ramb_v2.0
Ovis aries musimon	GCA_000765115.1	Ovis aries musimon	HM236184.1	16616	13	https://ftp.ncbi.nlm.nih.gov/genomes/all/GCA/000/765/115/GCA_000765115.1_Oori1
Ovis canadensis	GCA_004026945.1	Ovis canadensis	NC_015889.1	16463	13	https://ftp.ncbi.nlm.nih.gov/genomes/all/GCA/004/026/945/GCA_004026945.1_OviCan_v1_BIUU
Ovis canadensis canadensis	GCA_001039535.1	Ovis canadensis	NC_015889.1	16463	13	https://ftp.ncbi.nlm.nih.gov/genomes/all/GCA/001/039/535/GCA_001039535.1_ASM103953v1
Ovis nivicola lydekkeri	GCA_903231385.1	Ovis nivicola lydekkeri	NC_039431.1	16471	13	https://ftp.ncbi.nlm.nih.gov/genomes/all/GCA/903/231/385/GCA_903231385.1_OvNiv1.0
Ovis orientalis	GCA_014523465.1	Ovis orientalis	NC_026063.1	16617	13	https://ftp.ncbi.nlm.nih.gov/genomes/all/GCA/014/523/465/GCA_014523465.1_CAU_Oori_1.0
Pan paniscus	GCA_013052645.3	Pan paniscus	NC_001644.1	16563	13	https://ftp.ncbi.nlm.nih.gov/genomes/all/GCA/013/052/645/GCA_013052645.3_Mhudiblu_PPA_v2
Pan troglodytes	GCA_002880755.3	Pan troglodytes	NC_001643.1	16554	13	https://ftp.ncbi.nlm.nih.gov/genomes/all/GCA/002/880/755/GCA_002880755.3_Clint_PTRv2
Pan troglodytes verus	GCA_000002175.2	Pan troglodytes verus	GU112739.1	16561	13	https://ftp.ncbi.nlm.nih.gov/genomes/all/GCA/000/002/175/GCA_000002175.2_CCYSCv1
Panthera leo	GCA_018350215.1	Panthera leo	NC_028302.1	16620	13	https://ftp.ncbi.nlm.nih.gov/genomes/all/GCA/018/350/215/GCA_018350215.1_P.leo_Ple1_pat1.1
Panthera onca	GCA_004023805.1	Panthera onca	KF483864.1	17049	13	https://ftp.ncbi.nlm.nih.gov/genomes/all/GCA/004/023/805/GCA_004023805.1_PanOnc_v1_BIUU
Panthera pardus	GCA_001857705.1	Panthera pardus	NC_010641.1	16964	13	https://ftp.ncbi.nlm.nih.gov/genomes/all/GCA/001/857/705/GCA_001857705.1_PanPar1.0
Panthera tigris	GCA_018350195.2	Panthera tigris	NC_010642.1	16990	13	https://ftp.ncbi.nlm.nih.gov/genomes/all/GCA/018/350/195/GCA_018350195.2_P.tigris_Pti1_mat1.1
Panthera tigris altaica	GCA_000464555.1	Panthera tigris altaica	HM185182.2	16995	13	https://ftp.ncbi.nlm.nih.gov/genomes/all/GCA/000/464/555/GCA_000464555.1_PanTig1.0
Panthera tigris jacksoni	GCA_019348595.1	Panthera tigris	NC_010642.1	16990	13	https://ftp.ncbi.nlm.nih.gov/genomes/all/GCA/019/348/595/GCA_019348595.1_Maltig1.0
Pantholops hodgsonii	GCA_000400835.1	Pantholops hodgsonii	NC_007441.1	16498	13	https://ftp.ncbi.nlm.nih.gov/genomes/all/GCA/000/400/835/GCA_000400835.1_PHO1.0
Papio anubis	GCA_008728515.1	Papio anubis	NC_020006.2	16516	13	https://ftp.ncbi.nlm.nih.gov/genomes/all/GCA/008/728/515/GCA_008728515.1_Panubis1.0
Paradoxurus hermaphroditus	GCA_004024585.1	Paradoxurus hermaphroditus	NC_039591.1	16706	13	https://ftp.ncbi.nlm.nih.gov/genomes/all/GCA/004/024/585/GCA_004024585.1_ParHer_v1_BIUU
Parantechinus apicalis	GCA_904810715.1	Parantechinus apicalis	KJ868135.1	15420	13	https://ftp.ncbi.nlm.nih.gov/genomes/all/GCA/904/810/715/GCA_904810715.1_ERS5079534_MarsupialExonCaptKit
Perameles bougainville	GCA_904810595.1	Perameles bougainville	KJ868136.1	15377	13	https://ftp.ncbi.nlm.nih.gov/genomes/all/GCA/904/810/595/GCA_904810595.1_ERS5079518_MarsupialExonCaptKit
Perameles gunnii	GCA_904813075.1	Perameles gunnii	AJ639872.1	15360	13	https://ftp.ncbi.nlm.nih.gov/genomes/all/GCA/904/813/075/GCA_904813075.1_ERS5079772_MarsupialExonCaptKit
Perameles nasuta	GCA_904813225.1	Perameles nasuta	KJ868137.1	15362	13	https://ftp.ncbi.nlm.nih.gov/genomes/all/GCA/904/813/225/GCA_904813225.1_ERS5079786_MarsupialExonCaptKit
Peromyscus attwateri	GCA_902168425.1	Peromyscus attwateri	NC_035593.1	16593	13	https://ftp.ncbi.nlm.nih.gov/genomes/all/GCA/902/168/425/GCA_902168425.1_Patt_10x_v1
Peromyscus aztecus	GCA_902168405.1	Peromyscus aztecus	NC_035596.1	16656	13	https://ftp.ncbi.nlm.nih.gov/genomes/all/GCA/902/168/405/GCA_902168405.1_Pazt_10x_v1
Peromyscus eremicus	GCA_902702925.1	Peromyscus eremicus	NC_047188.1	15988	13	https://ftp.ncbi.nlm.nih.gov/genomes/all/GCA/902/702/925/GCA_902702925.1_Peer1.7.4
Peromyscus leucopus	GCA_004664715.2	Peromyscus leucopus	NC_037180.1	16326	13	https://ftp.ncbi.nlm.nih.gov/genomes/all/GCA/004/664/715/GCA_004664715.2_UCI_PerLeu_2.1
Peromyscus maniculatus bairdii	GCA_003704035.3	Peromyscus maniculatus bairdii	NC_039921.1	16322	13	https://ftp.ncbi.nlm.nih.gov/genomes/all/GCA/003/704/035/GCA_003704035.3_HU_Pman_2.1.3
Peromyscus melanophrys	GCA_902168415.1	Peromyscus melanophrys	NC_035611.1	16739	13	https://ftp.ncbi.nlm.nih.gov/genomes/all/GCA/902/168/415/GCA_902168415.1_Pmel_10x_v1
Peromyscus polionotus subgriseus	GCA_003704135.2	Peromyscus polionotus	NC_035571.1	16413	13	https://ftp.ncbi.nlm.nih.gov/genomes/all/GCA/003/704/135/GCA_003704135.2_HU_Ppol_1.3.3
Peroryctes raffrayana	GCA_904813055.1	Peroryctes raffrayana	KJ868138.1	15368	13	https://ftp.ncbi.nlm.nih.gov/genomes/all/GCA/904/813/055/GCA_904813055.1_ERS5079768_MarsupialExonCaptKit
Petauroides volans	GCA_904813455.1	Petauroides volans	KJ868139.1	16037	13	https://ftp.ncbi.nlm.nih.gov/genomes/all/GCA/904/813/455/GCA_904813455.1_ERS5079808_MarsupialExonCaptKit
Petaurus breviceps	GCA_904810845.1	Petaurus breviceps	NC_008135.1	16103	13	https://ftp.ncbi.nlm.nih.gov/genomes/all/GCA/904/810/845/GCA_904810845.1_ERS5079552_MarsupialExonCaptKit
Petrogale brachyotis victoriae	GCA_904812595.1	Petrogale brachyotis	KJ868140.1	16898	13	https://ftp.ncbi.nlm.nih.gov/genomes/all/GCA/904/812/595/GCA_904812595.1_ERS5079733_MarsupialExonCaptKit
Petrogale xanthopus celeris	GCA_904812275.1	Petrogale xanthopus	KY996509.1	17025	13	https://ftp.ncbi.nlm.nih.gov/genomes/all/GCA/904/812/275/GCA_904812275.1_ERS5079693_MarsupialExonCaptKit
Petrogale xanthopus xanthopus	GCA_904812355.1	Petrogale xanthopus	KY996509.1	17025	13	https://ftp.ncbi.nlm.nih.gov/genomes/all/GCA/904/812/355/GCA_904812355.1_ERS5079696_MarsupialExonCaptKit
Phacochoerus africanus	GCA_016906955.1	Phacochoerus africanus	CM029269.1	16743	13	https://ftp.ncbi.nlm.nih.gov/genomes/all/GCA/016/906/955/GCA_016906955.1_ROS_Pafr_v1
Phalanger gymnotis	GCA_904814165.1	Phalanger gymnotis	KJ868142.1	15355	13	https://ftp.ncbi.nlm.nih.gov/genomes/all/GCA/904/814/165/GCA_904814165.1_ERS5079881_MarsupialExonCaptKit
Phalanger orientalis	GCA_904813025.1	Phalanger orientalis	NC_056259.1	15860	13	https://ftp.ncbi.nlm.nih.gov/genomes/all/GCA/904/813/025/GCA_904813025.1_ERS5079766_MarsupialExonCaptKit
Phalanger vestitus	GCA_904813955.1	Phalanger vestitus	NC_008137.1	15318	13	https://ftp.ncbi.nlm.nih.gov/genomes/all/GCA/904/813/955/GCA_904813955.1_ERS5079854_MarsupialExonCaptKit
Phascogale calura	GCA_904813325.1	Phascogale calura	KJ868143.1	15395	13	https://ftp.ncbi.nlm.nih.gov/genomes/all/GCA/904/813/325/GCA_904813325.1_ERS5079796_MarsupialExonCaptKit
Phascogale tapoatafa	GCA_904813255.1	Phascogale tapoatafa	NC_006523.1	17405	13	https://ftp.ncbi.nlm.nih.gov/genomes/all/GCA/904/813/255/GCA_904813255.1_ERS5079789_MarsupialExonCaptKit
Phascolarctos cinereus	GCA_002099425.1	Phascolarctos cinereus	NC_008133.1	16357	13	https://ftp.ncbi.nlm.nih.gov/genomes/all/GCA/002/099/425/GCA_002099425.1_phaCin_unsw_v4.1
Phascolosorex dorsalis	GCA_904813985.1	Phascolosorex dorsalis	KJ868144.1	15422	13	https://ftp.ncbi.nlm.nih.gov/genomes/all/GCA/904/813/985/GCA_904813985.1_ERS5079860_MarsupialExonCaptKit
Philantomba maxwellii	GCA_006410695.1	Philantomba maxwellii	NC_020735.1	16440	13	https://ftp.ncbi.nlm.nih.gov/genomes/all/GCA/006/410/695/GCA_006410695.1_MXD
Phoca vitulina	GCA_004348235.1	Phoca vitulina	NC_001325.1	16826	13	https://ftp.ncbi.nlm.nih.gov/genomes/all/GCA/004/348/235/GCA_004348235.1_GSC_HSeal_1.0
Phocoena phocoena	GCA_004363495.1	Phocoena phocoena	NC_005280.1	16382	13	https://ftp.ncbi.nlm.nih.gov/genomes/all/GCA/004/363/495/GCA_004363495.1_PhoPho_v1_BIUU
Phocoena sinus	GCA_008692025.1	Phocoena sinus	CM018178.1	16370	13	https://ftp.ncbi.nlm.nih.gov/genomes/all/GCA/008/692/025/GCA_008692025.1_mPhoSin1.pri
Phodopus sungorus	GCA_001707965.1	Phodopus sungorus	NC_042823.1	16346	13	https://ftp.ncbi.nlm.nih.gov/genomes/all/GCA/001/707/965/GCA_001707965.1_Psun0.5
Phyllostomus discolor	GCA_004126475.3	Phyllostomus discolor	CM016611.2	16692	13	https://ftp.ncbi.nlm.nih.gov/genomes/all/GCA/004/126/475/GCA_004126475.3_mPhyDis1.pri.v3
Phyllostomus hastatus	GCA_019186645.1	Phyllostomus hastatus	M80906.1	684	1	https://ftp.ncbi.nlm.nih.gov/genomes/all/GCA/019/186/645/GCA_019186645.1_TTU_PhHast_1/
Physeter catodon	GCA_002837175.2	Physeter catodon	NC_002503.2	16428	13	https://ftp.ncbi.nlm.nih.gov/genomes/all/GCA/002/837/175/GCA_002837175.2_ASM283717v2
Pipistrellus kuhlii	GCA_014108245.1	Pipistrellus kuhlii	CM024384.1	17189	13	https://ftp.ncbi.nlm.nih.gov/genomes/all/GCA/014/108/245/GCA_014108245.1_mPipKuh1.p
Pipistrellus pipistrellus	GCA_903992545.1	Pipistrellus pipistrellus	LR862378.1	16925	13	https://ftp.ncbi.nlm.nih.gov/genomes/all/GCA/903/992/545/GCA_903992545.1_mPipPip1.1
Planigale gilesi	GCA_904811035.1	Planigale gilesi	KJ868147.1	15423	13	https://ftp.ncbi.nlm.nih.gov/genomes/all/GCA/904/811/035/GCA_904811035.1_ERS5079582_MarsupialExonCaptKit
Planigale ingrami	GCA_904813785.1	Planigale ingrami	U10319.1	1146	1	https://ftp.ncbi.nlm.nih.gov/genomes/all/GCA/904/813/785/GCA_904813785.1_ERS5079842_MarsupialExonCaptKit
Planigale maculata	GCA_904811815.1	Planigale maculata	U07590.1	1146	1	https://ftp.ncbi.nlm.nih.gov/genomes/all/GCA/904/811/815/GCA_904811815.1_ERS5079656_MarsupialExonCaptKit
Planigale tenuirostris	GCA_904813295.1	Planigale tenuirostris	U07591.1	1146	1	https://ftp.ncbi.nlm.nih.gov/genomes/all/GCA/904/813/295/GCA_904813295.1_ERS5079798_MarsupialExonCaptKit
Platanista gangetica	GCA_017311385.1	Platanista gangetica	NC_057433.1	16319	13	https://ftp.ncbi.nlm.nih.gov/genomes/all/GCA/017/311/385/GCA_017311385.1_HRRL_Platanista_gangetica_1.0
Platanista minor	GCA_004363435.1	Platanista minor	NC_005275.1	16324	13	https://ftp.ncbi.nlm.nih.gov/genomes/all/GCA/004/363/435/GCA_004363435.1_PlaMin_v1_BIUU
Pongo abelii	GCA_002880775.3	Pongo abelii	NC_002083.1	16499	13	https://ftp.ncbi.nlm.nih.gov/genomes/all/GCA/002/880/775/GCA_002880775.3_Susie_PABv2
Pongo pygmaeus	GCA_900086635.1	Pongo pygmaeus	NC_001646.1	16389	13	https://ftp.ncbi.nlm.nih.gov/genomes/all/GCA/900/086/635/GCA_900086635.1_NGS12
Pontoporia blainvillei	GCA_011754075.1	Pontoporia blainvillei	NC_005277.1	16593	13	https://ftp.ncbi.nlm.nih.gov/genomes/all/GCA/011/754/075/GCA_011754075.1_ASM1175407v1
Potorous longipes	GCA_904812075.1	Potorous longipes	KJ868148.1	16905	13	https://ftp.ncbi.nlm.nih.gov/genomes/all/GCA/904/812/075/GCA_904812075.1_ERS5079564_MarsupialExonCaptKit
Potorous tridactylus	GCA_904813345.1	Potorous tridactylus	NC_006524.1	16922	13	https://ftp.ncbi.nlm.nih.gov/genomes/all/GCA/904/813/345/GCA_904813345.1_ERS5079795_MarsupialExonCaptKit
Potos flavus	GCA_015708855.1	Potos flavus	CM027365.1	16434	13	https://ftp.ncbi.nlm.nih.gov/genomes/all/GCA/015/708/855/GCA_015708855.1_Pflavus_platanus500
Praomys delectorum	GCA_019843815.1	Praomys delectorum	NC_053817.1	16235	13	https://ftp.ncbi.nlm.nih.gov/genomes/all/GCA/019/843/815/GCA_019843815.1_ASM1984381v1
Prionailurus bengalensis	GCA_016509475.2	Prionailurus bengalensis	NC_028301.1	16701	13	https://ftp.ncbi.nlm.nih.gov/genomes/all/GCA/016/509/475/GCA_016509475.2_Fcat_Pben_1.1_paternal_pri
Prionailurus bengalensis euptilurus	GCA_005406085.2	Prionailurus bengalensis euptilurus	NC_016189.1	16990	13	https://ftp.ncbi.nlm.nih.gov/genomes/all/GCA/005/406/085/GCA_005406085.2_Prionailurus_bengalensis_euptilurus_v03
Prionailurus iriomotensis	GCA_018403415.1	Prionailurus iriomotensis	AB210228.1	1140	1	https://ftp.ncbi.nlm.nih.gov/genomes/all/GCA/018/403/415/GCA_018403415.1_P_iriomotensis_scaffold_01
Prionailurus viverrinus	GCA_018119265.1	Prionailurus viverrinus	KP202270.1	16723	13	https://ftp.ncbi.nlm.nih.gov/genomes/all/GCA/018/119/265/GCA_018119265.1_PriViv1.0
Procapra przewalskii	GCA_006410515.1	Procapra przewalskii	NC_014875.1	16548	13	https://ftp.ncbi.nlm.nih.gov/genomes/all/GCA/006/410/515/GCA_006410515.1_PLG
Procavia capensis	GCA_004026925.2	Procavia capensis	NC_004919.1	16743	13	https://ftp.ncbi.nlm.nih.gov/genomes/all/GCA/004/026/925/GCA_004026925.2_ProCapCap_v2_BIUU_UCD
Procyon lotor	GCA_015708975.1	Procyon lotor	CM027276.1	16557	13	https://ftp.ncbi.nlm.nih.gov/genomes/all/GCA/015/708/975/GCA_015708975.1_Plotor_platanus500
Prolemur simus	GCA_003258685.1	Prolemur simus	KC757408.1	16765	13	https://ftp.ncbi.nlm.nih.gov/genomes/all/GCA/003/258/685/GCA_003258685.1_Prosim_1.0
Propithecus coquereli	GCA_000956105.1	Propithecus coquereli	NC_011053.1	17104	13	https://ftp.ncbi.nlm.nih.gov/genomes/all/GCA/000/956/105/GCA_000956105.1_Pcoq_1.0
Proteles cristata cristata	GCA_017311185.1	Proteles cristata	NC_053964.1	17159	13	https://ftp.ncbi.nlm.nih.gov/genomes/all/GCA/017/311/185/GCA_017311185.1_Proteles_cristatus_TS307_19_07_2019
Przewalskium albirostris	GCA_006408465.1	Przewalskium albirostris	NC_016707.1	16478	13	https://ftp.ncbi.nlm.nih.gov/genomes/all/GCA/006/408/465/GCA_006408465.1_WLD
Psammomys obesus	GCA_907164565.1	Psammomys obesus	NC_037509.1	16592	13	https://ftp.ncbi.nlm.nih.gov/genomes/all/GCA/907/164/565/GCA_907164565.1_mPsaObe1.curated_primary_1811
Pseudantechinus bilarni	GCA_904812015.1	Pseudantechinus bilarni	KJ868149.1	15429	13	https://ftp.ncbi.nlm.nih.gov/genomes/all/GCA/904/812/015/GCA_904812015.1_ERS5079567_MarsupialExonCaptKit
Pseudantechinus macdonnellensis	GCA_904810615.1	Pseudantechinus macdonnellensis	KJ868150.1	15419	13	https://ftp.ncbi.nlm.nih.gov/genomes/all/GCA/904/810/615/GCA_904810615.1_ERS5079523_MarsupialExonCaptKit
Pseudantechinus ningbing	GCA_904813655.1	Pseudantechinus ningbing	U07592.1	1146	1	https://ftp.ncbi.nlm.nih.gov/genomes/all/GCA/904/813/655/GCA_904813655.1_ERS5079829_MarsupialExonCaptKit
Pseudantechinus woolleyae	GCA_904810565.1	Pseudantechinus woolleyae	U07593.1	1146	1	https://ftp.ncbi.nlm.nih.gov/genomes/all/GCA/904/810/565/GCA_904810565.1_ERS5079532_MarsupialExonCaptKit
Pseudocheirus peregrinus	GCA_904813195.1	Pseudocheirus peregrinus	NC_006519.1	16022	13	https://ftp.ncbi.nlm.nih.gov/genomes/all/GCA/904/813/195/GCA_904813195.1_ERS5079783_MarsupialExonCaptKit
Pseudochirops albertisii	GCA_904810865.1	Pseudochirops albertisii	KJ868151.1	15398	13	https://ftp.ncbi.nlm.nih.gov/genomes/all/GCA/904/810/865/GCA_904810865.1_ERS5079542_MarsupialExonCaptKit
Pseudochirulus canescens	GCA_904813875.1	Pseudochirulus canescens	KJ868152.1	16099	13	https://ftp.ncbi.nlm.nih.gov/genomes/all/GCA/904/813/875/GCA_904813875.1_ERS5079851_MarsupialExonCaptKit
Pseudochirulus herbertensis	GCA_904810725.1	Pseudochirulus herbertensis	KJ868153.1	15940	13	https://ftp.ncbi.nlm.nih.gov/genomes/all/GCA/904/810/725/GCA_904810725.1_ERS5079540_MarsupialExonCaptKit
Pseudois nayaur	GCA_003182575.1	Pseudois nayaur	NC_020632.1	16737	13	https://ftp.ncbi.nlm.nih.gov/genomes/all/GCA/003/182/575/GCA_003182575.1_ASM318257v1
Pteronotus parnellii	GCA_000465405.1	Pteronotus parnellii	NC_023368.1	16564	13	https://ftp.ncbi.nlm.nih.gov/genomes/all/GCA/000/465/405/GCA_000465405.1_ASM46540v1
Pteropus alecto	GCA_000325575.1	Pteropus alecto	NC_023122.1	16739	13	https://ftp.ncbi.nlm.nih.gov/genomes/all/GCA/000/325/575/GCA_000325575.1_ASM32557v1
Pteropus giganteus	GCA_902729225.1	Pteropus giganteus	AB079800.1	957	1	https://ftp.ncbi.nlm.nih.gov/genomes/all/GCA/902/729/225/GCA_902729225.1_Ma_sr-lr_union100
Pteropus vampyrus	GCA_000151845.2	Pteropus vampyrus	NC_026542.1	16554	13	https://ftp.ncbi.nlm.nih.gov/genomes/all/GCA/000/151/845/GCA_000151845.2_Pvam_2.0
Puma concolor	GCA_003327715.1	Puma concolor	NC_016470.1	17153	13	https://ftp.ncbi.nlm.nih.gov/genomes/all/GCA/003/327/715/GCA_003327715.1_PumCon1.0
Puma yagouaroundi	GCA_014898765.1	Puma yagouaroundi	NC_028311.1	16700	13	https://ftp.ncbi.nlm.nih.gov/genomes/all/GCA/014/898/765/GCA_014898765.1_PumYag
Pygathrix nemaeus	GCA_004024825.1	Pygathrix nemaeus	NC_008220.1	15467	13	https://ftp.ncbi.nlm.nih.gov/genomes/all/GCA/004/024/825/GCA_004024825.1_PygNem_v1_BIUU
Rangifer tarandus	GCA_004026565.1	Rangifer tarandus	NC_007703.1	16362	13	https://ftp.ncbi.nlm.nih.gov/genomes/all/GCA/004/026/565/GCA_004026565.1_RanTarSib_v1_BIUU
Rangifer tarandus caribou	GCA_019903745.1	Rangifer tarandus	NC_007703.1	16362	13	https://ftp.ncbi.nlm.nih.gov/genomes/all/GCA/019/903/745/GCA_019903745.1_ULRtarCaribou_2
Rangifer tarandus granti	GCA_014898785.1	Rangifer tarandus granti	CM026447.1	16362	13	https://ftp.ncbi.nlm.nih.gov/genomes/all/GCA/014/898/785/GCA_014898785.1_LSU_RangTar_1.0
Rangifer tarandus tarandus	GCA_902712895.1	Rangifer tarandus	NC_007703.1	16362	13	https://ftp.ncbi.nlm.nih.gov/genomes/all/GCA/902/712/895/GCA_902712895.1_Rtarandus_v2.1
Raphicerus campestris	GCA_006410735.1	Raphicerus campestris	NC_020741.1	16392	13	https://ftp.ncbi.nlm.nih.gov/genomes/all/GCA/006/410/735/GCA_006410735.1_SNB
Rattus norvegicus	GCA_015227675.2	Rattus norvegicus	NC_001665.2	16313	13	https://ftp.ncbi.nlm.nih.gov/genomes/all/GCA/015/227/675/GCA_015227675.2_mRatBN7.2
Rattus rattus	GCA_011064425.1	Rattus rattus	NC_012374.1	16305	13	https://ftp.ncbi.nlm.nih.gov/genomes/all/GCA/011/064/425/GCA_011064425.1_Rrattus_CSIRO_v1
Rhabdomys dilectus	GCA_019844195.1	Rhabdomys dilectus	MN807596.1	16258	13	https://ftp.ncbi.nlm.nih.gov/genomes/all/GCA/019/844/195/GCA_019844195.1_ASM1984419v1
Rhinoceros unicornis	GCA_019022865.1	Rhinoceros unicornis	NC_001779.1	16829	13	https://ftp.ncbi.nlm.nih.gov/genomes/all/GCA/019/022/865/GCA_019022865.1_ASM1902286v1
Rhinolophus ferrumequinum	GCA_004115265.3	Rhinolophus ferrumequinum	CM016610.1	16838	13	https://ftp.ncbi.nlm.nih.gov/genomes/all/GCA/004/115/265/GCA_004115265.3_mRhiFer1_v1.p
Rhinopithecus bieti	GCA_001698545.1	Rhinopithecus bieti	NC_015486.1	16551	13	https://ftp.ncbi.nlm.nih.gov/genomes/all/GCA/001/698/545/GCA_001698545.1_ASM169854v1
Rhinopithecus roxellana	GCA_007565055.1	Rhinopithecus roxellana	NC_008218.1	16549	13	https://ftp.ncbi.nlm.nih.gov/genomes/all/GCA/007/565/055/GCA_007565055.1_ASM756505v1
Rhizomys pruinosus	GCA_009823505.1	Rhizomys pruinosus	NC_021478.1	16575	13	https://ftp.ncbi.nlm.nih.gov/genomes/all/GCA/009/823/505/GCA_009823505.1_RhiPru_1.0
Rhombomys opimus	GCA_010120015.1	Rhombomys opimus	MK359635.1	16352	13	https://ftp.ncbi.nlm.nih.gov/genomes/all/GCA/010/120/015/GCA_010120015.1_ASM1012001v1
Rousettus aegyptiacus	GCA_014176215.1	Rousettus aegyptiacus	CM024382.1	16645	13	https://ftp.ncbi.nlm.nih.gov/genomes/all/GCA/014/176/215/GCA_014176215.1_mRouAeg1.p
Rousettus leschenaultii	GCA_015472975.1	Rousettus leschenaultii	NC_046927.1	16655	13	https://ftp.ncbi.nlm.nih.gov/genomes/all/GCA/015/472/975/GCA_015472975.1_rouLes_1.0
Saiga tatarica	GCA_004024985.1	Saiga tatarica	NC_020746.1	16375	13	https://ftp.ncbi.nlm.nih.gov/genomes/all/GCA/004/024/985/GCA_004024985.1_SaiTat_v1_BIUU
Saimiri boliviensis boliviensis	GCA_016699345.1	Saimiri boliviensis boliviensis	NC_018096.1	16473	13	https://ftp.ncbi.nlm.nih.gov/genomes/all/GCA/016/699/345/GCA_016699345.1_BCM_Sbol_2.0
Sarcophilus harrisii	GCA_902635505.1	Sarcophilus harrisii	NC_018788.1	17117	13	https://ftp.ncbi.nlm.nih.gov/genomes/all/GCA/902/635/505/GCA_902635505.1_mSarHar1.11
Scalopus aquaticus	GCA_004024925.1	Scalopus aquaticus	AB076809.1	1140	1	https://ftp.ncbi.nlm.nih.gov/genomes/all/GCA/004/024/925/GCA_004024925.1_ScaAqu_v1_BIUU
Sciurus carolinensis	GCA_902686445.2	Sciurus carolinensis	LR822069.1	16533	13	https://ftp.ncbi.nlm.nih.gov/genomes/all/GCA/902/686/445/GCA_902686445.2_mSciCar1.2
Sciurus niger	GCA_020740815.1	Sciurus niger	KY411003.1	16164	13	https://ftp.ncbi.nlm.nih.gov/genomes/all/GCA/020/740/815/GCA_020740815.1_VCOM_Snig_1.0
Sciurus vulgaris	GCA_902686455.2	Sciurus vulgaris	LR822068.1	16511	13	https://ftp.ncbi.nlm.nih.gov/genomes/all/GCA/902/686/455/GCA_902686455.2_mSciVul1.2
Semnopithecus entellus	GCA_004025065.1	Semnopithecus entellus	NC_008215.1	16532	13	https://ftp.ncbi.nlm.nih.gov/genomes/all/GCA/004/025/065/GCA_004025065.1_SemEnt_v1_BIUU
Setonix brachyurus	GCA_904810765.1	Setonix brachyurus	KJ868156.1	16849	13	https://ftp.ncbi.nlm.nih.gov/genomes/all/GCA/904/810/765/GCA_904810765.1_ERS5079537_MarsupialExonCaptKit
Sigmodon hispidus	GCA_004025045.1	Sigmodon hispidus	NC_035572.1	16394	13	https://ftp.ncbi.nlm.nih.gov/genomes/all/GCA/004/025/045/GCA_004025045.1_SigHis_v1_BIUU
Sminthopsis crassicaudata	GCA_904814005.1	Sminthopsis crassicaudata	NC_007631.1	17363	13	https://ftp.ncbi.nlm.nih.gov/genomes/all/GCA/904/814/005/GCA_904814005.1_ERS5079865_MarsupialExonCaptKit
Sminthopsis dolichura	GCA_904814115.1	Sminthopsis dolichura	KJ868158.1	12798	13	https://ftp.ncbi.nlm.nih.gov/genomes/all/GCA/904/814/115/GCA_904814115.1_ERS5079875_MarsupialExonCaptKit
Sminthopsis macroura	GCA_904813265.1	Sminthopsis macroura	AB011229.1	957	1	https://ftp.ncbi.nlm.nih.gov/genomes/all/GCA/904/813/265/GCA_904813265.1_ERS5079791_MarsupialExonCaptKit
Sminthopsis murina	GCA_904813715.1	Sminthopsis murina	U07594.1	1146	1	https://ftp.ncbi.nlm.nih.gov/genomes/all/GCA/904/813/715/GCA_904813715.1_ERS5079841_MarsupialExonCaptKit
Sminthopsis psammophila	GCA_904810705.1	Sminthopsis psammophila	KJ868159.1	15425	13	https://ftp.ncbi.nlm.nih.gov/genomes/all/GCA/904/810/705/GCA_904810705.1_ERS5079533_MarsupialExonCaptKit
Solenodon paradoxus	GCA_004363575.1	Solenodon paradoxus paradoxus	KU697358.1	16454	13	https://ftp.ncbi.nlm.nih.gov/genomes/all/GCA/004/363/575/GCA_004363575.1_SolPar_v1_BIUU
Solenodon paradoxus woodi	GCA_002901085.1	Solenodon paradoxus woodi	KU697359.1	16457	13	https://ftp.ncbi.nlm.nih.gov/genomes/all/GCA/002/901/085/GCA_002901085.1_ASM290108v1
Sorex araneus	GCA_000181275.2	Sorex araneus	NC_027963.1	16887	13	https://ftp.ncbi.nlm.nih.gov/genomes/all/GCA/000/181/275/GCA_000181275.2_SorAra2.0
Sousa chinensis	GCA_007760645.1	Sousa chinensis	NC_012057.1	16388	13	https://ftp.ncbi.nlm.nih.gov/genomes/all/GCA/007/760/645/GCA_007760645.1_ASM776064v1
Spermophilus dauricus	GCA_002406435.1	Spermophilus dauricus	NC_027283.1	16512	13	https://ftp.ncbi.nlm.nih.gov/genomes/all/GCA/002/406/435/GCA_002406435.1_ASM240643v1
Spilocuscus maculatus	GCA_904812975.1	Spilocuscus maculatus	KJ868160.1	15984	13	https://ftp.ncbi.nlm.nih.gov/genomes/all/GCA/904/812/975/GCA_904812975.1_ERS5079765_MarsupialExonCaptKit
Spilogale gracilis	GCA_004023965.1	Spilogale gracilis gracilis	MW205864.1	16297	13	https://ftp.ncbi.nlm.nih.gov/genomes/all/GCA/004/023/965/GCA_004023965.1_SpiGra_v1_BIUU
Strigocuscus celebensis	GCA_904812005.1	Strigocuscus celebensis	MH220729.1	15358	13	https://ftp.ncbi.nlm.nih.gov/genomes/all/GCA/904/812/005/GCA_904812005.1_ERS5079569_MarsupialExonCaptKit
Suricata suricatta	GCA_006229205.1	Suricata suricatta	NC_045900.1	16914	13	https://ftp.ncbi.nlm.nih.gov/genomes/all/GCA/006/229/205/GCA_006229205.1_meerkat_22Aug2017_6uvM2_HiC
Sus scrofa	GCA_000003025.6	Sus scrofa	NC_000845.1	16613	13	https://ftp.ncbi.nlm.nih.gov/genomes/all/GCA/000/003/025/GCA_000003025.6_Sscrofa11.1
Sus scrofa domesticus	GCA_017957985.1	Sus scrofa domesticus	NC_012095.1	16770	13	https://ftp.ncbi.nlm.nih.gov/genomes/all/GCA/017/957/985/GCA_017957985.1_ASM1795798v1
Sus scrofa scrofa	GCA_006511355.2	Sus scrofa scrofa	CP071572.1	16611	13	https://ftp.ncbi.nlm.nih.gov/genomes/all/GCA/006/511/355/GCA_006511355.2_NSME_pig_1.2
Sylvicapra grimmia	GCA_006408735.1	Sylvicapra grimmia	NC_020747.1	16437	13	https://ftp.ncbi.nlm.nih.gov/genomes/all/GCA/006/408/735/GCA_006408735.1_CMD
Syncerus caffer	GCA_902825105.1	Syncerus caffer	NC_020617.1	16359	13	https://ftp.ncbi.nlm.nih.gov/genomes/all/GCA/902/825/105/GCA_902825105.1_synceruscaffer
Tachyglossus aculeatus	GCA_015852505.1	Tachyglossus aculeatus	CM027631.1	16381	13	https://ftp.ncbi.nlm.nih.gov/genomes/all/GCA/015/852/505/GCA_015852505.1_mTacAcu1.pri
Tadarida brasiliensis	GCA_004025005.1	Tadarida brasiliensis	L19734.1	528	1	https://ftp.ncbi.nlm.nih.gov/genomes/all/GCA/004/025/005/GCA_004025005.1_TadBra_v1_BIUU
Talpa occidentalis	GCA_014898055.1	Talpa occidentalis	NC_039630.1	16962	13	https://ftp.ncbi.nlm.nih.gov/genomes/all/GCA/014/898/055/GCA_014898055.1_MPIMG_talOcc4
Tamandua tetradactyla	GCA_004025105.1	Tamandua tetradactyla	NC_004032.1	16395	13	https://ftp.ncbi.nlm.nih.gov/genomes/all/GCA/004/025/105/GCA_004025105.1_TamTet_v1_BIUU
Tapirus indicus	GCA_004024905.1	Tapirus indicus	NC_023838.1	16717	13	https://ftp.ncbi.nlm.nih.gov/genomes/all/GCA/004/024/905/GCA_004024905.1_TapInd_v1_BIUU
Tapirus terrestris	GCA_004025025.1	Tapirus terrestris	NC_053962.1	16772	13	https://ftp.ncbi.nlm.nih.gov/genomes/all/GCA/004/025/025/GCA_004025025.1_TapTer_v1_BIUU
Tarsipes rostratus	GCA_904813485.1	Tarsipes rostratus	NC_006518.1	15744	13	https://ftp.ncbi.nlm.nih.gov/genomes/all/GCA/904/813/485/GCA_904813485.1_ERS5079811_MarsupialExonCaptKit
Taxidea taxus jeffersonii	GCA_003697995.1	Taxidea taxus	NC_020646.1	16425	13	https://ftp.ncbi.nlm.nih.gov/genomes/all/GCA/003/697/995/GCA_003697995.1_ASM369799v1
Theropithecus gelada	GCA_003255815.1	Theropithecus gelada	NC_019802.1	16546	13	https://ftp.ncbi.nlm.nih.gov/genomes/all/GCA/003/255/815/GCA_003255815.1_Tgel_1.0
Thryonomys swinderianus	GCA_004025085.1	Thryonomys swinderianus	NC_002658.1	16626	13	https://ftp.ncbi.nlm.nih.gov/genomes/all/GCA/004/025/085/GCA_004025085.1_ThrSwi_v1_BIUU
Thylacinus cynocephalus	GCA_007646695.1	Thylacinus cynocephalus	NC_011944.1	17411	13	https://ftp.ncbi.nlm.nih.gov/genomes/all/GCA/007/646/695/GCA_007646695.1_UniMelb_Thylacine_Refassem_1
Thylogale billardierii	GCA_904811155.1	Thylogale billardierii	KJ868162.1	16874	13	https://ftp.ncbi.nlm.nih.gov/genomes/all/GCA/904/811/155/GCA_904811155.1_ERS5079583_MarsupialExonCaptKit
Tolypeutes matacus	GCA_004025125.1	Tolypeutes matacus	NC_028575.1	16980	13	https://ftp.ncbi.nlm.nih.gov/genomes/all/GCA/004/025/125/GCA_004025125.1_TolMat_v1_BIUU
Tonatia saurophila	GCA_004024845.1	Tonatia saurophila	NC_022428.1	16629	13	https://ftp.ncbi.nlm.nih.gov/genomes/all/GCA/004/024/845/GCA_004024845.1_TonSau_v1_BIUU
Trachypithecus francoisi	GCA_009764315.1	Trachypithecus francoisi	NC_023970.1	16554	13	https://ftp.ncbi.nlm.nih.gov/genomes/all/GCA/009/764/315/GCA_009764315.1_Tfra_2.0
Tragelaphus buxtoni	GCA_006411685.1	Tragelaphus buxtoni	NC_038064.1	16601	13	https://ftp.ncbi.nlm.nih.gov/genomes/all/GCA/006/411/685/GCA_006411685.1_MTN
Tragelaphus eurycerus	GCA_006410755.1	Tragelaphus eurycerus	NC_020749.1	16349	13	https://ftp.ncbi.nlm.nih.gov/genomes/all/GCA/006/410/755/GCA_006410755.1_BNG
Tragelaphus imberbis	GCA_006410775.1	Tragelaphus imberbis	EF536356.1	16405	13	https://ftp.ncbi.nlm.nih.gov/genomes/all/GCA/006/410/775/GCA_006410775.1_LEK
Tragelaphus oryx	GCA_006416875.1	Tragelaphus oryx	NC_020750.1	16397	13	https://ftp.ncbi.nlm.nih.gov/genomes/all/GCA/006/416/875/GCA_006416875.1_CME
Tragelaphus scriptus	GCA_006410495.1	Tragelaphus scriptus	NC_020751.1	16402	13	https://ftp.ncbi.nlm.nih.gov/genomes/all/GCA/006/410/495/GCA_006410495.1_BUB
Tragelaphus spekii	GCA_006411015.1	Tragelaphus spekii	EF536357.1	16408	13	https://ftp.ncbi.nlm.nih.gov/genomes/all/GCA/006/411/015/GCA_006411015.1_STG
Tragelaphus strepsiceros	GCA_006410795.1	Tragelaphus strepsiceros	JN632708.1	16382	13	https://ftp.ncbi.nlm.nih.gov/genomes/all/GCA/006/410/795/GCA_006410795.1_GTK
Tragulus javanicus	GCA_004024965.2	Tragulus javanicus	AB122093.1	1140	1	https://ftp.ncbi.nlm.nih.gov/genomes/all/GCA/004/024/965/GCA_004024965.2_ASM402496v2
Tragulus kanchil	GCA_006408655.1	Tragulus kanchil	JN632709.1	16333	13	https://ftp.ncbi.nlm.nih.gov/genomes/all/GCA/006/408/655/GCA_006408655.1_LMD
Tremarctos ornatus	GCA_018398825.1	Tremarctos ornatus	NC_009969.1	16766	13	https://ftp.ncbi.nlm.nih.gov/genomes/all/GCA/018/398/825/GCA_018398825.1_TreOrn1.0
Trichechus manatus latirostris	GCA_000243295.1	Trichechus manatus latirostris	MN105083.1	16881	13	https://ftp.ncbi.nlm.nih.gov/genomes/all/GCA/000/243/295/GCA_000243295.1_TriManLat1.0
Trichosurus vulpecula	GCA_011100635.1	Trichosurus vulpecula	NC_003039.1	17191	13	https://ftp.ncbi.nlm.nih.gov/genomes/all/GCA/011/100/635/GCA_011100635.1_mTriVul1.pri
Tupaia belangeri	GCA_000181375.1	Tupaia belangeri	NC_002521.1	16754	13	https://ftp.ncbi.nlm.nih.gov/genomes/all/GCA/000/181/375/GCA_000181375.1_ASM18137v1
Tupaia tana	GCA_004365275.1	Tupaia tana	NC_050992.1	16186	13	https://ftp.ncbi.nlm.nih.gov/genomes/all/GCA/004/365/275/GCA_004365275.1_TupTan_v1_BIUU
Tursiops aduncus	GCA_003227395.1	Tursiops aduncus	NC_012058.1	16385	13	https://ftp.ncbi.nlm.nih.gov/genomes/all/GCA/003/227/395/GCA_003227395.1_ASM322739v1
Tursiops truncatus	GCA_011762595.1	Tursiops truncatus	NC_012059.1	16388	13	https://ftp.ncbi.nlm.nih.gov/genomes/all/GCA/011/762/595/GCA_011762595.1_mTurTru1.mat.Y
Tympanoctomys barrerae	GCA_002564285.1	Tympanoctomys barrerae	NC_020792.1	16863	13	https://ftp.ncbi.nlm.nih.gov/genomes/all/GCA/002/564/285/GCA_002564285.1_Tym_barrerae_AO245_v1
Urocitellus parryii	GCA_003426925.1	Urocitellus parryii	MN935780.1	16460	13	https://ftp.ncbi.nlm.nih.gov/genomes/all/GCA/003/426/925/GCA_003426925.1_ASM342692v1
Uropsilus gracilis	GCA_004024945.1	Uropsilus gracilis	NC_031330.1	16536	13	https://ftp.ncbi.nlm.nih.gov/genomes/all/GCA/004/024/945/GCA_004024945.1_UroGra_v1_BIUU
Ursus americanus	GCA_003344425.1	Ursus americanus	NC_003426.1	16841	13	https://ftp.ncbi.nlm.nih.gov/genomes/all/GCA/003/344/425/GCA_003344425.1_ASM334442v1
Ursus arctos	GCA_000612945.1	Ursus arctos	NC_003427.1	17020	13	https://ftp.ncbi.nlm.nih.gov/genomes/all/GCA/000/612/945/GCA_000612945.1_CS3220
Ursus arctos horribilis	GCA_003584765.2	Ursus arctos horribilis	CM035080.1	17676	13	https://ftp.ncbi.nlm.nih.gov/genomes/all/GCA/003/584/765/GCA_003584765.2_ASM358476v2
Ursus maritimus	GCA_017311325.1	Ursus maritimus	NC_003428.1	17017	13	https://ftp.ncbi.nlm.nih.gov/genomes/all/GCA/017/311/325/GCA_017311325.1_ASM1731132v1
Ursus thibetanus japonicus	GCA_014364545.1	Ursus thibetanus	NC_009971.1	16795	13	https://ftp.ncbi.nlm.nih.gov/genomes/all/GCA/014/364/545/GCA_014364545.1_U_thibetanus_scaffold_01
Ursus thibetanus thibetanus	GCA_009660055.1	Ursus thibetanus thibetanus	NC_011118.1	17034	13	https://ftp.ncbi.nlm.nih.gov/genomes/all/GCA/009/660/055/GCA_009660055.1_ASM966005v1
Vicugna pacos	GCA_000164845.4	Vicugna pacos	NC_002504.1	16652	13	https://ftp.ncbi.nlm.nih.gov/genomes/all/GCA/000/164/845/GCA_000164845.4_VicPac3.1
Vicugna pacos huacaya	GCA_000767525.1	Vicugna pacos huacaya	KU168760.1	16505	13	https://ftp.ncbi.nlm.nih.gov/genomes/all/GCA/000/767/525/GCA_000767525.1_Vi_pacos_V1.0
Vicugna vicugna mensalis	GCA_013265495.1	Vicugna vicugna	NC_013558.1	16084	13	https://ftp.ncbi.nlm.nih.gov/genomes/all/GCA/013/265/495/GCA_013265495.1_ASM1326549v1
Vombatus ursinus	GCA_900497805.2	Vombatus ursinus	NC_003322.1	16996	13	https://ftp.ncbi.nlm.nih.gov/genomes/all/GCA/900/497/805/GCA_900497805.2_bare-nosed_wombat_genome_assembly
Vulpes lagopus	GCA_018345385.1	Vulpes lagopus	NC_026529.1	16656	13	https://ftp.ncbi.nlm.nih.gov/genomes/all/GCA/018/345/385/GCA_018345385.1_ASM1834538v1
Vulpes vulpes	GCA_003160815.1	Vulpes vulpes	NC_008434.1	16813	13	https://ftp.ncbi.nlm.nih.gov/genomes/all/GCA/003/160/815/GCA_003160815.1_VulVul2.2
Wallabia bicolor	GCA_904813435.1	Wallabia bicolor	KY996500.1	17140	13	https://ftp.ncbi.nlm.nih.gov/genomes/all/GCA/904/813/435/GCA_904813435.1_ERS5079809_MarsupialExonCaptKit
Wyulda squamicaudata	GCA_904810785.1	Wyulda squamicaudata	KJ868165.1	15360	13	https://ftp.ncbi.nlm.nih.gov/genomes/all/GCA/904/810/785/GCA_904810785.1_ERS5079544_MarsupialExonCaptKit
Zalophus californianus	GCA_009762305.2	Zalophus californianus	NC_008416.1	16677	13	https://ftp.ncbi.nlm.nih.gov/genomes/all/GCA/009/762/305/GCA_009762305.2_mZalCal1.pri.v2
Ziphius cavirostris	GCA_004364475.1	Ziphius cavirostris	NC_021435.1	16349	13	https://ftp.ncbi.nlm.nih.gov/genomes/all/GCA/004/364/475/GCA_004364475.1_ZipCav_v1_BIUU
Bos taurus x Bison bison	GCA_018282465.1	Bos taurus x Bison bison	JAEQBJ010001314.1	16338	13	https://ftp.ncbi.nlm.nih.gov/genomes/all/GCA/018/282/465/GCA_018282465.1_ARS_Simm1.0
Eulemur flavifrons	GCA_001262665.1	Eulemur flavifrons	LGHW01038363.1/LGHW01038364.1/LGHW01038365.1/LGHW01038366.1/LGHW01038367.1	201/236/239/305/377	4	https://ftp.ncbi.nlm.nih.gov/genomes/all/GCA/001/262/665/GCA_001262665.1_Eflavifronsk33QCA
Sylvilagus bachmani	GCA_015711505.1	Sylvilagus bachmani	JADBBT010037584.1/JADBBT010045726.1/JADBBT010048759.1	1544/1304/1237	6	https://ftp.ncbi.nlm.nih.gov/genomes/all/GCA/015/711/505/GCA_015711505.1_Sylvilagus_bachmani_HiC
Bird
Acanthisitta chloris	GCA_000695815.1	Acanthisitta chloris	NC_051004.1	16935	13	https://ftp.ncbi.nlm.nih.gov/genomes/all/GCA/000/695/815/GCA_000695815.1_ASM69581v1
Accipiter gentilis	GCA_012487025.1	Accipiter gentilis	NC_011818.1	18266	13	https://ftp.ncbi.nlm.nih.gov/genomes/all/GCA/012/487/025/GCA_012487025.1_Agentilis_1.0
Accipiter gentilis atricapillus	GCA_017309825.1	Accipiter gentilis	NC_011818.1	18266	13	https://ftp.ncbi.nlm.nih.gov/genomes/all/GCA/017/309/825/GCA_017309825.1_UBC_NOGO_v1
Accipiter nisus	GCA_004320145.1	Accipiter nisus	NC_025580.1	18647	13	https://ftp.ncbi.nlm.nih.gov/genomes/all/GCA/004/320/145/GCA_004320145.1_Accipiter_nisus_ver1.0
Acrocephalus arundinaceus	GCA_013398685.1	Acrocephalus arundinaceus	MN356442.1	13946	12	https://ftp.ncbi.nlm.nih.gov/genomes/all/GCA/013/398/685/GCA_013398685.1_ASM1339868v1
Acrocephalus scirpaceus scirpaceus	GCA_910950805.1	Acrocephalus scirpaceus	NC_010227.1	17903	13	https://ftp.ncbi.nlm.nih.gov/genomes/all/GCA/910/950/805/GCA_910950805.1_RW_assembly
Aegithalos caudatus	GCA_013389925.1	Aegithalos caudatus	MN356243.1	14913	12	https://ftp.ncbi.nlm.nih.gov/genomes/all/GCA/013/389/925/GCA_013389925.1_ASM1338992v1
Aegotheles bennettii	GCA_013398125.1	Aegotheles bennettii	NC_052816.1	16810	13	https://ftp.ncbi.nlm.nih.gov/genomes/all/GCA/013/398/125/GCA_013398125.1_ASM1339812v1
Agapornis roseicollis	GCA_002631895.1	Agapornis roseicollis	NC_011708.1	16732	13	https://ftp.ncbi.nlm.nih.gov/genomes/all/GCA/002/631/895/GCA_002631895.1_ASM263189v1
Agelaius phoeniceus	GCA_013398535.1	Agelaius phoeniceus	NC_018801.1	16775	13	https://ftp.ncbi.nlm.nih.gov/genomes/all/GCA/013/398/535/GCA_013398535.1_ASM1339853v1
Agelaius tricolor	GCA_017165875.1	Agelaius tricolor	L07526.1	224	1	https://ftp.ncbi.nlm.nih.gov/genomes/all/GCA/017/165/875/GCA_017165875.1_TRBL-genome
Alauda arvensis	GCA_902810485.1	Alauda arvensis	NC_020425.1	17018	13	https://ftp.ncbi.nlm.nih.gov/genomes/all/GCA/902/810/485/GCA_902810485.1_skylark_genome
Alaudala cheleensis	GCA_013398995.1	Alaudala cheleensis	NC_046419.1	17021	13	https://ftp.ncbi.nlm.nih.gov/genomes/all/GCA/013/398/995/GCA_013398995.1_ASM1339899v1
Alca torda	GCA_008658365.1	Alca torda	CM018102.1	19110	13	https://ftp.ncbi.nlm.nih.gov/genomes/all/GCA/008/658/365/GCA_008658365.1_bAlcTor1_primary
Aleadryas rufinucha	GCA_013397815.1	Aleadryas rufinucha	NC_053088.1	16933	13	https://ftp.ncbi.nlm.nih.gov/genomes/all/GCA/013/397/815/GCA_013397815.1_ASM1339781v1
Alectura lathami	GCA_013399715.1	Alectura lathami	NC_007227.1	16698	13	https://ftp.ncbi.nlm.nih.gov/genomes/all/GCA/013/399/715/GCA_013399715.1_ASM1339971v1
Alopecoenas beccarii	GCA_013399365.1	Alopecoenas beccarii	MN356295.1	15585	12	https://ftp.ncbi.nlm.nih.gov/genomes/all/GCA/013/399/365/GCA_013399365.1_ASM1339936v1
Amazona aestiva	GCA_017639355.1	Amazona aestiva	NC_033336.1	18853	13	https://ftp.ncbi.nlm.nih.gov/genomes/all/GCA/017/639/355/GCA_017639355.1_Aaes_hic
Amazona guildingii	GCA_013399615.1	Amazona guildingii	NC_052783.1	19229	13	https://ftp.ncbi.nlm.nih.gov/genomes/all/GCA/013/399/615/GCA_013399615.1_ASM1339961v1
Anas platyrhynchos	GCA_015476345.1	Anas platyrhynchos	NC_009684.1	16604	13	https://ftp.ncbi.nlm.nih.gov/genomes/all/GCA/015/476/345/GCA_015476345.1_ZJU1.0
Anas platyrhynchos platyrhynchos	GCA_002743455.1	Anas platyrhynchos	NC_009684.1	16604	13	https://ftp.ncbi.nlm.nih.gov/genomes/all/GCA/002/743/455/GCA_002743455.1_CAU_duck1.0
Anas zonorhyncha	GCA_002224875.1	Anas zonorhyncha	MZ593724.1	16605	13	https://ftp.ncbi.nlm.nih.gov/genomes/all/GCA/002/224/875/GCA_002224875.1_ASM222487v1
Anhinga anhinga	GCA_013396435.1	Anhinga anhinga	MN356170.1	16348	12	https://ftp.ncbi.nlm.nih.gov/genomes/all/GCA/013/396/435/GCA_013396435.1_ASM1339643v1
Anhinga rufa	GCA_013400875.1	Anhinga rufa	GU071055.1	19385	13	https://ftp.ncbi.nlm.nih.gov/genomes/all/GCA/013/400/875/GCA_013400875.1_ASM1340087v1
Anomalopteryx didiformis	GCA_006937325.1	Anomalopteryx didiformis	NC_002779.1	16716	13	https://ftp.ncbi.nlm.nih.gov/genomes/all/GCA/006/937/325/GCA_006937325.1_anoDid_nucDNA_orig
Anser cygnoides	GCA_013030995.1	Anser cygnoides	NC_023832.1	16739	13	https://ftp.ncbi.nlm.nih.gov/genomes/all/GCA/013/030/995/GCA_013030995.1_ASM1303099v1
Anser cygnoides domesticus	GCA_000971095.1	Anser cygnoides	NC_023832.1	16739	13	https://ftp.ncbi.nlm.nih.gov/genomes/all/GCA/000/971/095/GCA_000971095.1_AnsCyg_PRJNA183603_v1.0
Anser indicus	GCA_006229135.1	Anser indicus	NC_025654.1	16731	13	https://ftp.ncbi.nlm.nih.gov/genomes/all/GCA/006/229/135/GCA_006229135.1_ASM622913v1
Anseranas semipalmata	GCA_013399115.1	Anseranas semipalmata	NC_005933.1	16870	13	https://ftp.ncbi.nlm.nih.gov/genomes/all/GCA/013/399/115/GCA_013399115.1_ASM1339911v1
Anthoscopus minutus	GCA_013399455.1	Anthoscopus minutus	NC_053076.1	16760	13	https://ftp.ncbi.nlm.nih.gov/genomes/all/GCA/013/399/455/GCA_013399455.1_ASM1339945v1
Antrostomus carolinensis	GCA_000700745.1	Antrostomus carolinensis	MN356120.1	16794	13	https://ftp.ncbi.nlm.nih.gov/genomes/all/GCA/000/700/745/GCA_000700745.1_ASM70074v1
Apaloderma vittatum	GCA_000703405.1	Apaloderma vittatum	MN356115.1	14942	12	https://ftp.ncbi.nlm.nih.gov/genomes/all/GCA/000/703/405/GCA_000703405.1_ASM70340v1
Aphelocoma coerulescens	GCA_013398375.1	Aphelocoma coerulescens	NC_051467.1	16907	13	https://ftp.ncbi.nlm.nih.gov/genomes/all/GCA/013/398/375/GCA_013398375.1_ASM1339837v1
Aptenodytes forsteri	GCA_000699145.1	Aptenodytes forsteri	NC_027938.1	17301	13	https://ftp.ncbi.nlm.nih.gov/genomes/all/GCA/000/699/145/GCA_000699145.1_ASM69914v1
Aptenodytes patagonicus	GCA_010087175.1	Aptenodytes patagonicus	NC_045377.1	17477	13	https://ftp.ncbi.nlm.nih.gov/genomes/all/GCA/010/087/175/GCA_010087175.1_BGI_Apat.V1
Apteryx haastii	GCA_003342985.1	Apteryx haastii	NC_002782.2	16980	13	https://ftp.ncbi.nlm.nih.gov/genomes/all/GCA/003/342/985/GCA_003342985.1_aptHaa1
Apteryx mantelli mantelli	GCA_001039765.2	Apteryx mantelli mantelli	LK054805.1	16674	13	https://ftp.ncbi.nlm.nih.gov/genomes/all/GCA/001/039/765/GCA_001039765.2_AptMant0
Apteryx owenii	GCA_003342965.1	Apteryx owenii	NC_013806.1	17020	13	https://ftp.ncbi.nlm.nih.gov/genomes/all/GCA/003/342/965/GCA_003342965.1_aptOwe1
Apteryx rowi	GCA_003343035.1	Apteryx rowi	NC_052824.1	16972	13	https://ftp.ncbi.nlm.nih.gov/genomes/all/GCA/003/343/035/GCA_003343035.1_aptRow1
Aquila chrysaetos canadensis	GCA_000766835.1	Aquila chrysaetos	NC_024087.1	17332	13	https://ftp.ncbi.nlm.nih.gov/genomes/all/GCA/000/766/835/GCA_000766835.1_Aquila_chrysaetos-1.0.2
Aquila chrysaetos chrysaetos	GCA_902153765.2	Aquila chrysaetos chrysaetos	LR822062.1	18265	13	https://ftp.ncbi.nlm.nih.gov/genomes/all/GCA/902/153/765/GCA_902153765.2_bAquChr1.4_alternate_haplotype
Aquila chrysaetos japonica	GCA_012057345.1	Aquila chrysaetos	NC_024087.1	17332	13	https://ftp.ncbi.nlm.nih.gov/genomes/all/GCA/012/057/345/GCA_012057345.1_Achrysaetos_1.0
Ara ararauna	GCA_010014805.1	Ara ararauna	NC_029319.1	16982	13	https://ftp.ncbi.nlm.nih.gov/genomes/all/GCA/010/014/805/GCA_010014805.1_ASM1001480v1
Ara chloropterus	GCA_010014725.1	Ara chloropterus	NC_047199.1	16991	13	https://ftp.ncbi.nlm.nih.gov/genomes/all/GCA/010/014/725/GCA_010014725.1_ASM1001472v1
Ara glaucogularis	GCA_013433245.1	Ara glaucogularis	NC_026029.1	16983	13	https://ftp.ncbi.nlm.nih.gov/genomes/all/GCA/013/433/245/GCA_013433245.1_TAMU_Btm_v1.0
Ara macao	GCA_000400695.1	Ara macao	NC_045076.1	16970	13	https://ftp.ncbi.nlm.nih.gov/genomes/all/GCA/000/400/695/GCA_000400695.1_SMACv1.1
Ara militaris	GCA_010015965.1	Ara militaris	NC_027839.1	16990	13	https://ftp.ncbi.nlm.nih.gov/genomes/all/GCA/010/015/965/GCA_010015965.1_ASM1001596v1
Aramus guarauna	GCA_013400195.1	Aramus guarauna	NC_052795.1	16665	13	https://ftp.ncbi.nlm.nih.gov/genomes/all/GCA/013/400/195/GCA_013400195.1_ASM1340019v1
Aratinga solstitialis	GCA_902168055.1	Aratinga solstitialis	NC_026039.1	16984	13	https://ftp.ncbi.nlm.nih.gov/genomes/all/GCA/902/168/055/GCA_902168055.1_ARATINGA-SOLSTITIALIS-ASSEMBLY-PRJEB33153
Ardeotis kori	GCA_013396375.1	Ardeotis kori	NC_052775.1	17288	13	https://ftp.ncbi.nlm.nih.gov/genomes/all/GCA/013/396/375/GCA_013396375.1_ASM1339637v1
Arenaria interpres	GCA_013399435.1	Arenaria interpres	NC_003712.2	16725	13	https://ftp.ncbi.nlm.nih.gov/genomes/all/GCA/013/399/435/GCA_013399435.1_ASM1339943v1
Asarcornis scutulata	GCA_013398475.1	Asarcornis scutulata	NC_052827.1	16542	13	https://ftp.ncbi.nlm.nih.gov/genomes/all/GCA/013/398/475/GCA_013398475.1_ASM1339847v1
Atlantisia rogersi	GCA_013401215.1	Atlantisia rogersi	NC_039814.1	17337	13	https://ftp.ncbi.nlm.nih.gov/genomes/all/GCA/013/401/215/GCA_013401215.1_ASM1340121v1
Atrichornis clamosus	GCA_013400975.1	Atrichornis clamosus	NC_053102.1	17284	13	https://ftp.ncbi.nlm.nih.gov/genomes/all/GCA/013/400/975/GCA_013400975.1_ASM1340097v1
Aythya fuligula	GCA_009819795.1	Aythya fuligula	NC_024595.1	16616	13	https://ftp.ncbi.nlm.nih.gov/genomes/all/GCA/009/819/795/GCA_009819795.1_bAytFul2.pri
Balaeniceps rex	GCA_013401315.1	Balaeniceps rex	MZ337602.1	16925	13	https://ftp.ncbi.nlm.nih.gov/genomes/all/GCA/013/401/315/GCA_013401315.1_ASM1340131v1
Balearica regulorum gibbericeps	GCA_000709895.1	Balearica regulorum gibbericeps	CM021656.1	19234	13	https://ftp.ncbi.nlm.nih.gov/genomes/all/GCA/000/709/895/GCA_000709895.1_ASM70989v1
Baryphthengus martii	GCA_013396935.1	Baryphthengus martii	MN356187.1	17464	13	https://ftp.ncbi.nlm.nih.gov/genomes/all/GCA/013/396/935/GCA_013396935.1_ASM1339693v1
Bombycilla garrulus	GCA_013400315.1	Bombycilla garrulus	NC_053057.1	16875	13	https://ftp.ncbi.nlm.nih.gov/genomes/all/GCA/013/400/315/GCA_013400315.1_ASM1340031v1
Brachypteracias leptosomus	GCA_013401335.1	Brachypteracias leptosomus	NC_052810.1	17205	13	https://ftp.ncbi.nlm.nih.gov/genomes/all/GCA/013/401/335/GCA_013401335.1_ASM1340133v1
Branta canadensis	GCA_006130075.1	Branta canadensis	NC_007011.1	16760	13	https://ftp.ncbi.nlm.nih.gov/genomes/all/GCA/006/130/075/GCA_006130075.1_GSC_cangoose_1.0
Bubo bubo	GCA_010303855.1	Bubo bubo	NC_038219.1	18952	13	https://ftp.ncbi.nlm.nih.gov/genomes/all/GCA/010/303/855/GCA_010303855.1_BubBub1.0
Bubo scandiacus	GCA_017315185.1	Bubo scandiacus	NC_038220.1	18734	13	https://ftp.ncbi.nlm.nih.gov/genomes/all/GCA/017/315/185/GCA_017315185.1_ASM1731518v1
Bucco capensis	GCA_013396975.1	Bucco capensis	NC_052779.1	16679	13	https://ftp.ncbi.nlm.nih.gov/genomes/all/GCA/013/396/975/GCA_013396975.1_ASM1339697v1
Buceros rhinoceros silvestris	GCA_000710305.1	Buceros rhinoceros silvestris	MG596878.1	17390	13	https://ftp.ncbi.nlm.nih.gov/genomes/all/GCA/000/710/305/GCA_000710305.1_ASM71030v1
Bucorvus abyssinicus	GCA_009769605.1	Bucorvus abyssinicus	MN356327.1	15121	13	https://ftp.ncbi.nlm.nih.gov/genomes/all/GCA/009/769/605/GCA_009769605.1_bBucAby1.pri
Buphagus erythrorhynchus	GCA_013400855.1	Buphagus erythrorhynchus	NC_053077.1	16802	13	https://ftp.ncbi.nlm.nih.gov/genomes/all/GCA/013/400/855/GCA_013400855.1_ASM1340085v1
Burhinus bistriatus	GCA_013397275.1	Burhinus bistriatus	NC_052794.1	16856	13	https://ftp.ncbi.nlm.nih.gov/genomes/all/GCA/013/397/275/GCA_013397275.1_ASM1339727v1
Cairina moschata	GCA_018104995.1	Cairina moschata	NC_010965.1	16610	13	https://ftp.ncbi.nlm.nih.gov/genomes/all/GCA/018/104/995/GCA_018104995.1_ASM1810499v1
Cairina moschata domestica	GCA_009194515.1	Cairina moschata	NC_010965.1	16610	13	https://ftp.ncbi.nlm.nih.gov/genomes/all/GCA/009/194/515/GCA_009194515.1_CaiMos1.0
Calcarius ornatus	GCA_013397715.1	Calcarius ornatus	NC_053083.1	16815	13	https://ftp.ncbi.nlm.nih.gov/genomes/all/GCA/013/397/715/GCA_013397715.1_ASM1339771v1
Calidris pugnax	GCA_001431845.1	Calidris pugnax	NC_046877.1	16902	13	https://ftp.ncbi.nlm.nih.gov/genomes/all/GCA/001/431/845/GCA_001431845.1_ASM143184v1
Callaeas wilsoni	GCA_013398955.1	Callaeas wilsoni	MN356152.1	14032	13	https://ftp.ncbi.nlm.nih.gov/genomes/all/GCA/013/398/955/GCA_013398955.1_ASM1339895v1
Callipepla squamata	GCA_002218305.1	Callipepla squamata	NC_029340.1	16701	13	https://ftp.ncbi.nlm.nih.gov/genomes/all/GCA/002/218/305/GCA_002218305.1_ASM221830v1
Caloenas nicobarica	GCA_013398195.1	Caloenas nicobarica	NC_031869.1	17090	13	https://ftp.ncbi.nlm.nih.gov/genomes/all/GCA/013/398/195/GCA_013398195.1_ASM1339819v1
Calonectris borealis	GCA_013401115.1	Calonectris borealis	MN356423.1	16117	13	https://ftp.ncbi.nlm.nih.gov/genomes/all/GCA/013/401/115/GCA_013401115.1_ASM1340111v1
Calypte anna	GCA_003957555.2	Calypte anna	CM016612.1	18981	13	https://ftp.ncbi.nlm.nih.gov/genomes/all/GCA/003/957/555/GCA_003957555.2_bCalAnn1_v1.p
Calyptomena viridis	GCA_013390005.1	Calyptomena viridis	MN356274.1	14910	12	https://ftp.ncbi.nlm.nih.gov/genomes/all/GCA/013/390/005/GCA_013390005.1_ASM1339000v1
Campylorhamphus procurvoides	GCA_013396655.1	Campylorhamphus procurvoides	NC_051012.1	16936	13	https://ftp.ncbi.nlm.nih.gov/genomes/all/GCA/013/396/655/GCA_013396655.1_ASM1339665v1
Cardinalis cardinalis	GCA_014549065.1	Cardinalis cardinalis	NC_025618.1	16779	13	https://ftp.ncbi.nlm.nih.gov/genomes/all/GCA/014/549/065/GCA_014549065.1_CCar_1.0
Cariama cristata	GCA_000690535.1	Cariama cristata	CM020379.1	21618	13	https://ftp.ncbi.nlm.nih.gov/genomes/all/GCA/000/690/535/GCA_000690535.1_ASM69053v1
Casuarius casuarius	GCA_003342895.1	Casuarius casuarius	NC_002778.2	16756	13	https://ftp.ncbi.nlm.nih.gov/genomes/all/GCA/003/342/895/GCA_003342895.1_casCas1
Cathartes aura	GCA_000699945.1	Cathartes aura	NC_007628.1	16779	13	https://ftp.ncbi.nlm.nih.gov/genomes/all/GCA/000/699/945/GCA_000699945.1_ASM69994v1
Catharus fuscescens	GCA_013398975.1	Catharus fuscescens	NC_051013.1	16766	13	https://ftp.ncbi.nlm.nih.gov/genomes/all/GCA/013/398/975/GCA_013398975.1_ASM1339897v1
Catharus ustulatus	GCA_009819885.2	Catharus ustulatus	CM020378.1	18726	13	https://ftp.ncbi.nlm.nih.gov/genomes/all/GCA/009/819/885/GCA_009819885.2_bCatUst1.pri.v2
Centrocercus minimus	GCA_005890655.1	Centrocercus minimus	CM016737.1	16641	13	https://ftp.ncbi.nlm.nih.gov/genomes/all/GCA/005/890/655/GCA_005890655.1_Cmin_1.0
Centrocercus urophasianus	GCA_019232065.1	Centrocercus urophasianus	MW574357.1	16697	13	https://ftp.ncbi.nlm.nih.gov/genomes/all/GCA/019/232/065/GCA_019232065.1_USGS_Curo_1.0
Centropus bengalensis	GCA_013400815.1	Centropus bengalensis	NC_050049.1	17117	13	https://ftp.ncbi.nlm.nih.gov/genomes/all/GCA/013/400/815/GCA_013400815.1_ASM1340081v1
Centropus unirufus	GCA_013397695.1	Centropus unirufus	NC_052811.1	17089	13	https://ftp.ncbi.nlm.nih.gov/genomes/all/GCA/013/397/695/GCA_013397695.1_ASM1339769v1
Cephalopterus ornatus	GCA_013396775.1	Cephalopterus ornatus	NC_051008.1	17003	13	https://ftp.ncbi.nlm.nih.gov/genomes/all/GCA/013/396/775/GCA_013396775.1_ASM1339677v1
Cepphus grylle	GCA_013401065.1	Cepphus grylle	MN356419.1	16633	13	https://ftp.ncbi.nlm.nih.gov/genomes/all/GCA/013/401/065/GCA_013401065.1_ASM1340106v1
Cercotrichas coryphoeus	GCA_013398595.1	Cercotrichas coryphoeus	MN356422.1	14898	12	https://ftp.ncbi.nlm.nih.gov/genomes/all/GCA/013/398/595/GCA_013398595.1_ASM1339859v1
Certhia brachydactyla	GCA_013400355.1	Certhia brachydactyla	NC_053055.1	16920	13	https://ftp.ncbi.nlm.nih.gov/genomes/all/GCA/013/400/355/GCA_013400355.1_ASM1340035v1
Certhia familiaris	GCA_013398575.1	Certhia familiaris	MN356433.1	9475	10	https://ftp.ncbi.nlm.nih.gov/genomes/all/GCA/013/398/575/GCA_013398575.1_ASM1339857v1
Cettia cetti	GCA_013401135.1	Cettia cetti	MN356444.1	8008	8	https://ftp.ncbi.nlm.nih.gov/genomes/all/GCA/013/401/135/GCA_013401135.1_ASM1340113v1
Ceuthmochares aereus	GCA_013398935.1	Ceuthmochares aereus	NC_052776.1	17187	13	https://ftp.ncbi.nlm.nih.gov/genomes/all/GCA/013/398/935/GCA_013398935.1_ASM1339893v1
Ceyx cyanopectus	GCA_013401355.1	Ceyx cyanopectus	MN356329.1	16822	13	https://ftp.ncbi.nlm.nih.gov/genomes/all/GCA/013/401/355/GCA_013401355.1_ASM1340135v1
Chaetops frenatus	GCA_013400775.1	Chaetops frenatus	NC_053080.1	16795	13	https://ftp.ncbi.nlm.nih.gov/genomes/all/GCA/013/400/775/GCA_013400775.1_ASM1340077v1
Chaetorhynchus papuensis	GCA_013396525.1	Chaetorhynchus papuensis	NC_051007.1	16956	13	https://ftp.ncbi.nlm.nih.gov/genomes/all/GCA/013/396/525/GCA_013396525.1_ASM1339652v1
Chaetura pelagica	GCA_000747805.1	Chaetura pelagica	NC_028545.1	16896	13	https://ftp.ncbi.nlm.nih.gov/genomes/all/GCA/000/747/805/GCA_000747805.1_ChaPel_1.0
Charadrius alexandrinus	GCA_008711295.1	Charadrius alexandrinus	NC_041118.1	16905	13	https://ftp.ncbi.nlm.nih.gov/genomes/all/GCA/008/711/295/GCA_008711295.1_ASM871129v1
Charadrius vociferus	GCA_000708025.2	Charadrius vociferus	NC_052771.1	16808	13	https://ftp.ncbi.nlm.nih.gov/genomes/all/GCA/000/708/025/GCA_000708025.2_ASM70802v2
Chauna torquata	GCA_013399475.1	Chauna torquata	NC_052807.1	16766	13	https://ftp.ncbi.nlm.nih.gov/genomes/all/GCA/013/399/475/GCA_013399475.1_ASM1339947v1
Chionis minor	GCA_013398295.1	Chionis minor	MN356383.1	16722	13	https://ftp.ncbi.nlm.nih.gov/genomes/all/GCA/013/398/295/GCA_013398295.1_ASM1339829v1
Chlamydotis macqueenii	GCA_000695195.1	Chlamydotis macqueenii	MK714019.1	16821	13	https://ftp.ncbi.nlm.nih.gov/genomes/all/GCA/000/695/195/GCA_000695195.1_ASM69519v1
Chloroceryle aenea	GCA_013399075.1	Chloroceryle aenea	NC_052793.1	17789	13	https://ftp.ncbi.nlm.nih.gov/genomes/all/GCA/013/399/075/GCA_013399075.1_ASM1339907v1
Chloropsis cyanopogon	GCA_013400585.1	Chloropsis cyanopogon	NC_053068.1	16824	13	https://ftp.ncbi.nlm.nih.gov/genomes/all/GCA/013/400/585/GCA_013400585.1_ASM1340058v1
Chloropsis hardwickii	GCA_013390065.1	Chloropsis hardwickii	NC_053109.1	16813	13	https://ftp.ncbi.nlm.nih.gov/genomes/all/GCA/013/390/065/GCA_013390065.1_ASM1339006v1
Chordeiles acutipennis	GCA_013399635.1	Chordeiles acutipennis	MN356302.1	14877	12	https://ftp.ncbi.nlm.nih.gov/genomes/all/GCA/013/399/635/GCA_013399635.1_ASM1339963v1
Chroicocephalus maculipennis	GCA_013397655.1	Chroicocephalus maculipennis	NC_052812.1	16792	13	https://ftp.ncbi.nlm.nih.gov/genomes/all/GCA/013/397/655/GCA_013397655.1_ASM1339765v1
Chrysolophus pictus	GCA_003413605.1	Chrysolophus pictus	NC_014576.1	16678	13	https://ftp.ncbi.nlm.nih.gov/genomes/all/GCA/003/413/605/GCA_003413605.1_Chrysolophus_pictus_GenomeV1.0
Chunga burmeisteri	GCA_013396505.1	Chunga burmeisteri	MN356168.1	16867	13	https://ftp.ncbi.nlm.nih.gov/genomes/all/GCA/013/396/505/GCA_013396505.1_ASM1339650v1
Ciccaba nigrolineata	GCA_013396715.1	Ciccaba nigrolineata	MN356178.1	14875	12	https://ftp.ncbi.nlm.nih.gov/genomes/all/GCA/013/396/715/GCA_013396715.1_ASM1339671v1
Cicinnurus regius	GCA_003713305.1	Cicinnurus regius	U15201.1	1143	1	https://ftp.ncbi.nlm.nih.gov/genomes/all/GCA/003/713/305/GCA_003713305.1_CicReg_1.0
Ciconia boyciana	GCA_002002965.1	Ciconia boyciana	NC_002196.1	17622	13	https://ftp.ncbi.nlm.nih.gov/genomes/all/GCA/002/002/965/GCA_002002965.1_Ciconia_boyciana_ver1.0
Ciconia maguari	GCA_017639555.1	Ciconia maguari	CM030224.1	21477	13	https://ftp.ncbi.nlm.nih.gov/genomes/all/GCA/017/639/555/GCA_017639555.1_bCicMag1.pri
Cinclus mexicanus	GCA_013399935.1	Cinclus mexicanus	NC_051037.1	16818	13	https://ftp.ncbi.nlm.nih.gov/genomes/all/GCA/013/399/935/GCA_013399935.1_ASM1339993v1
Circaetus pectoralis	GCA_013399555.1	Circaetus pectoralis	NC_052805.1	17473	13	https://ftp.ncbi.nlm.nih.gov/genomes/all/GCA/013/399/555/GCA_013399555.1_ASM1339955v1
Cisticola juncidis	GCA_013400215.1	Cisticola juncidis	MN356258.1	14903	12	https://ftp.ncbi.nlm.nih.gov/genomes/all/GCA/013/400/215/GCA_013400215.1_ASM1340021v1
Climacteris rufus	GCA_013398175.1	Climacteris rufus	NC_053101.1	16866	13	https://ftp.ncbi.nlm.nih.gov/genomes/all/GCA/013/398/175/GCA_013398175.1_ASM1339817v1
Cnemophilus loriae	GCA_013397755.1	Cnemophilus loriae	NC_053090.1	16848	13	https://ftp.ncbi.nlm.nih.gov/genomes/all/GCA/013/397/755/GCA_013397755.1_ASM1339775v1
Cochlearius cochlearius	GCA_013396365.1	Cochlearius cochlearius	MN356159.1	15742	13	https://ftp.ncbi.nlm.nih.gov/genomes/all/GCA/013/396/365/GCA_013396365.1_ASM1339636v1
Colinus virginianus	GCA_008692595.2	Colinus virginianus	CM018327.2	16780	13	https://ftp.ncbi.nlm.nih.gov/genomes/all/GCA/008/692/595/GCA_008692595.2_Cv_LA_2.0
Colius striatus	GCA_000690715.1	Colius striatus	NC_052772.1	17283	13	https://ftp.ncbi.nlm.nih.gov/genomes/all/GCA/000/690/715/GCA_000690715.1_ASM69071v1
Columba livia	GCA_000337935.2	Columba livia	NC_013978.1	17229	13	https://ftp.ncbi.nlm.nih.gov/genomes/all/GCA/000/337/935/GCA_000337935.2_Cliv_2.1
Columbina picui	GCA_013397635.1	Columbina picui	MN356335.1	22004	13	https://ftp.ncbi.nlm.nih.gov/genomes/all/GCA/013/397/635/GCA_013397635.1_ASM1339763v1
Copsychus sechellarum	GCA_013398635.1	Copsychus sechellarum	MN356447.1	16839	13	https://ftp.ncbi.nlm.nih.gov/genomes/all/GCA/013/398/635/GCA_013398635.1_ASM1339863v1
Corvus brachyrhynchos	GCA_000691975.1	Corvus brachyrhynchos	NC_026461.1	16917	13	https://ftp.ncbi.nlm.nih.gov/genomes/all/GCA/000/691/975/GCA_000691975.1_ASM69197v1
Corvus cornix cornix	GCA_000738735.5	Corvus cornix cornix	NC_024698.1	16946	13	https://ftp.ncbi.nlm.nih.gov/genomes/all/GCA/000/738/735/GCA_000738735.5_ASM73873v5
Corvus hawaiiensis	GCA_003402825.1	Corvus hawaiiensis	NC_026783.1	16898	13	https://ftp.ncbi.nlm.nih.gov/genomes/all/GCA/003/402/825/GCA_003402825.1_Coha_1.0
Corvus macrorhynchos	GCA_014363025.1	Corvus macrorhynchos	NC_027173.1	16927	13	https://ftp.ncbi.nlm.nih.gov/genomes/all/GCA/014/363/025/GCA_014363025.1_C_macrorhynchos_scaffold_01
Corvus moneduloides	GCA_009650955.1	Corvus moneduloides	CM018859.1	16895	13	https://ftp.ncbi.nlm.nih.gov/genomes/all/GCA/009/650/955/GCA_009650955.1_bCorMon1.pri
Corythaeola cristata	GCA_013396815.1	Corythaeola cristata	MN356171.1	16531	13	https://ftp.ncbi.nlm.nih.gov/genomes/all/GCA/013/396/815/GCA_013396815.1_ASM1339681v1
Corythaixoides concolor	GCA_013399495.1	Corythaixoides concolor	NC_052806.1	16967	13	https://ftp.ncbi.nlm.nih.gov/genomes/all/GCA/013/399/495/GCA_013399495.1_ASM1339949v1
Coturnix japonica	GCA_001577835.2	Coturnix japonica	NC_003408.1	16697	13	https://ftp.ncbi.nlm.nih.gov/genomes/all/GCA/001/577/835/GCA_001577835.2_Coturnix_japonica_2.1
Crossoptilon mantchuricum	GCA_019593555.1	Crossoptilon mantchuricum	NC_026548.1	16690	13	https://ftp.ncbi.nlm.nih.gov/genomes/all/GCA/019/593/555/GCA_019593555.1_cma1
Crotophaga sulcirostris	GCA_013397455.1	Crotophaga sulcirostris	NC_052800.1	16933	13	https://ftp.ncbi.nlm.nih.gov/genomes/all/GCA/013/397/455/GCA_013397455.1_ASM1339745v1
Crypturellus cinnamomeus	GCA_003342915.1	Crypturellus cinnamomeus	NC_052825.1	16870	13	https://ftp.ncbi.nlm.nih.gov/genomes/all/GCA/003/342/915/GCA_003342915.1_cryCin1
Crypturellus soui	GCA_013389845.1	Crypturellus soui	NC_052773.1	16705	13	https://ftp.ncbi.nlm.nih.gov/genomes/all/GCA/013/389/845/GCA_013389845.1_ASM1338984v1
Crypturellus undulatus	GCA_013389825.1	Crypturellus undulatus	NC_052774.1	17096	13	https://ftp.ncbi.nlm.nih.gov/genomes/all/GCA/013/389/825/GCA_013389825.1_ASM1338982v1
Cuculus canorus	GCA_000709325.1	Cuculus canorus	CM030679.1	19698	13	https://ftp.ncbi.nlm.nih.gov/genomes/all/GCA/000/709/325/GCA_000709325.1_ASM70932v1
Cyanistes caeruleus	GCA_002901205.1	Cyanistes caeruleus	M88168.1	690	1	https://ftp.ncbi.nlm.nih.gov/genomes/all/GCA/002/901/205/GCA_002901205.1_cyaCae2
Cygnus atratus	GCA_013377495.1	Cygnus atratus	NC_012843.1	16748	13	https://ftp.ncbi.nlm.nih.gov/genomes/all/GCA/013/377/495/GCA_013377495.1_Cygnus_atratus_primary_v1.0
Cygnus cygnus	GCA_014362685.1	Cygnus cygnus	NC_027095.1	16724	13	https://ftp.ncbi.nlm.nih.gov/genomes/all/GCA/014/362/685/GCA_014362685.1_C_cygnus_scaffold_01
Cygnus olor	GCA_009769625.2	Cygnus olor	NC_027096.1	16739	13	https://ftp.ncbi.nlm.nih.gov/genomes/all/GCA/009/769/625/GCA_009769625.2_bCygOlo1.pri.v2
Daphoenositta chrysoptera	GCA_013397915.1	Daphoenositta chrysoptera	NC_053096.1	16915	13	https://ftp.ncbi.nlm.nih.gov/genomes/all/GCA/013/397/915/GCA_013397915.1_ASM1339791v1
Dasyornis broadbenti	GCA_013397935.1	Dasyornis broadbenti	NC_053097.1	16841	13	https://ftp.ncbi.nlm.nih.gov/genomes/all/GCA/013/397/935/GCA_013397935.1_ASM1339793v1
Dicaeum eximium	GCA_013396995.1	Dicaeum eximium	NC_051023.1	16832	13	https://ftp.ncbi.nlm.nih.gov/genomes/all/GCA/013/396/995/GCA_013396995.1_ASM1339699v1
Dicrurus megarhynchus	GCA_013399195.1	Dicrurus megarhynchus	NC_051028.1	16979	13	https://ftp.ncbi.nlm.nih.gov/genomes/all/GCA/013/399/195/GCA_013399195.1_ASM1339919v1
Diphyllodes magnificus	GCA_003713285.1	Diphyllodes magnificus	X74255.1	1143	1	https://ftp.ncbi.nlm.nih.gov/genomes/all/GCA/003/713/285/GCA_003713285.1_DipMag_1.0
Donacobius atricapilla	GCA_013397315.1	Donacobius atricapilla	MN356221.1	14902	12	https://ftp.ncbi.nlm.nih.gov/genomes/all/GCA/013/397/315/GCA_013397315.1_ASM1339731v1
Dromaius novaehollandiae	GCA_003342905.1	Dromaius novaehollandiae	NC_002784.1	16711	13	https://ftp.ncbi.nlm.nih.gov/genomes/all/GCA/003/342/905/GCA_003342905.1_droNov1
Dromas ardeola	GCA_013398915.1	Dromas ardeola	MN356323.1	20042	13	https://ftp.ncbi.nlm.nih.gov/genomes/all/GCA/013/398/915/GCA_013398915.1_ASM1339891v1
Drymodes brunneopygia	GCA_013400955.1	Drymodes brunneopygia	NC_053105.1	16851	13	https://ftp.ncbi.nlm.nih.gov/genomes/all/GCA/013/400/955/GCA_013400955.1_ASM1340095v1
Dryoscopus gambensis	GCA_013389985.1	Dryoscopus gambensis	NC_053067.1	16854	13	https://ftp.ncbi.nlm.nih.gov/genomes/all/GCA/013/389/985/GCA_013389985.1_ASM1338998v1
Eclectus roratus	GCA_011763535.1	Eclectus roratus	NC_027842.1	16842	13	https://ftp.ncbi.nlm.nih.gov/genomes/all/GCA/011/763/535/GCA_011763535.1_ASM1176353v1
Edolisoma coerulescens	GCA_013397115.1	Edolisoma coerulescens	NC_051017.1	16925	13	https://ftp.ncbi.nlm.nih.gov/genomes/all/GCA/013/397/115/GCA_013397115.1_ASM1339711v1
Egretta garzetta	GCA_000687185.1	Egretta garzetta	NC_023981.1	17361	13	https://ftp.ncbi.nlm.nih.gov/genomes/all/GCA/000/687/185/GCA_000687185.1_ASM68718v1
Elachura formosa	GCA_013398795.1	Elachura formosa	MN356374.1	5707	9	https://ftp.ncbi.nlm.nih.gov/genomes/all/GCA/013/398/795/GCA_013398795.1_ASM1339879v1
Emberiza fucata	GCA_013398835.1	Emberiza fucata	NC_033338.1	16752	13	https://ftp.ncbi.nlm.nih.gov/genomes/all/GCA/013/398/835/GCA_013398835.1_ASM1339883v1
Eolophus roseicapilla	GCA_013397615.1	Eolophus roseicapilla	MN356339.1	16751	13	https://ftp.ncbi.nlm.nih.gov/genomes/all/GCA/013/397/615/GCA_013397615.1_ASM1339761v1
Eopsaltria australis	GCA_003426825.1	Eopsaltria australis	NC_019665.1	16768	13	https://ftp.ncbi.nlm.nih.gov/genomes/all/GCA/003/426/825/GCA_003426825.1_eyr_v1
Eremophila alpestris peregrina	GCA_009792885.1	Eremophila alpestris	NC_048470.1	17855	13	https://ftp.ncbi.nlm.nih.gov/genomes/all/GCA/009/792/885/GCA_009792885.1_CLO_EAlp_1.0
Erithacus rubecula	GCA_903797595.2	Erithacus rubecula	MN356414.1	16150	12	https://ftp.ncbi.nlm.nih.gov/genomes/all/GCA/903/797/595/GCA_903797595.2_bEriRub2.2
Erpornis zantholeuca	GCA_013400515.1	Erpornis zantholeuca	NC_053069.1	16903	13	https://ftp.ncbi.nlm.nih.gov/genomes/all/GCA/013/400/515/GCA_013400515.1_ASM1340051v1
Erythrocercus mccallii	GCA_013397435.1	Erythrocercus mccallii	NC_053070.1	16878	13	https://ftp.ncbi.nlm.nih.gov/genomes/all/GCA/013/397/435/GCA_013397435.1_ASM1339743v1
Eubucco bourcierii	GCA_013396675.1	Eubucco bourcierii	MN356176.1	14861	12	https://ftp.ncbi.nlm.nih.gov/genomes/all/GCA/013/396/675/GCA_013396675.1_ASM1339667v1
Eudromia elegans	GCA_003342815.1	Eudromia elegans	NC_002772.2	18305	13	https://ftp.ncbi.nlm.nih.gov/genomes/all/GCA/003/342/815/GCA_003342815.1_eudEle1
Eudyptes chrysocome	GCA_010085355.1	Eudyptes chrysocome	NC_008138.1	16930	13	https://ftp.ncbi.nlm.nih.gov/genomes/all/GCA/010/085/355/GCA_010085355.1_BGI_Echrysoc.V1
Eudyptes chrysolophus	GCA_010084205.1	Eudyptes chrysolophus	NC_054275.1	17059	13	https://ftp.ncbi.nlm.nih.gov/genomes/all/GCA/010/084/205/GCA_010084205.1_BGI_Echrysol.V1
Eudyptes filholi	GCA_010085365.1	Eudyptes filholi	MK760990.1	15536	13	https://ftp.ncbi.nlm.nih.gov/genomes/all/GCA/010/085/365/GCA_010085365.1_BGI_Echrysoc_fil.V1
Eudyptes moseleyi	GCA_010082375.1	Eudyptes moseleyi	MK290243.1	15690	12	https://ftp.ncbi.nlm.nih.gov/genomes/all/GCA/010/082/375/GCA_010082375.1_BGI_Emos.V1
Eudyptes pachyrhynchus	GCA_010085335.1	Eudyptes pachyrhynchus	MK290246.1	15572	12	https://ftp.ncbi.nlm.nih.gov/genomes/all/GCA/010/085/335/GCA_010085335.1_BGI_Epac.V1
Eudyptes schlegeli	GCA_010080425.1	Eudyptes schlegeli	MK760988.1	15530	13	https://ftp.ncbi.nlm.nih.gov/genomes/all/GCA/010/080/425/GCA_010080425.1_BGI_Esch.V1
Eudyptes sclateri	GCA_010078445.1	Eudyptes sclateri	MK760984.1	15533	13	https://ftp.ncbi.nlm.nih.gov/genomes/all/GCA/010/078/445/GCA_010078445.1_BGI_Escl.V1
Eudyptula minor	GCA_010080355.1	Eudyptula minor	NC_004538.1	17611	13	https://ftp.ncbi.nlm.nih.gov/genomes/all/GCA/010/080/355/GCA_010080355.1_BGI_Emin.V1
Eulacestoma nigropectus	GCA_013397775.1	Eulacestoma nigropectus	NC_053091.1	16986	13	https://ftp.ncbi.nlm.nih.gov/genomes/all/GCA/013/397/775/GCA_013397775.1_ASM1339777v1
Eupsittula pertinax	GCA_011317185.1	Eupsittula pertinax chrysogenys	NC_015197.1	16980	13	https://ftp.ncbi.nlm.nih.gov/genomes/all/GCA/011/317/185/GCA_011317185.1_ASM1131718v1
Eurypyga helias	GCA_000690775.1	Eurypyga helias	MN356130.1	18213	13	https://ftp.ncbi.nlm.nih.gov/genomes/all/GCA/000/690/775/GCA_000690775.1_ASM69077v1
Eurystomus gularis	GCA_013400335.1	Eurystomus gularis	NC_052798.1	17379	13	https://ftp.ncbi.nlm.nih.gov/genomes/all/GCA/013/400/335/GCA_013400335.1_ASM1340033v1
Falco cherrug	GCA_000337975.1	Falco cherrug	NC_026715.1	18059	13	https://ftp.ncbi.nlm.nih.gov/genomes/all/GCA/000/337/975/GCA_000337975.1_F_cherrug_v1.0
Falco naumanni	GCA_017639655.1	Falco naumanni	NC_054728.1	17652	13	https://ftp.ncbi.nlm.nih.gov/genomes/all/GCA/017/639/655/GCA_017639655.1_bFalNau1.pat
Falco peregrinus	GCA_000337955.1	Falco peregrinus	NC_000878.1	18068	13	https://ftp.ncbi.nlm.nih.gov/genomes/all/GCA/000/337/955/GCA_000337955.1_F_peregrinus_v1.0
Falco rusticolus	GCA_015220075.1	Falco rusticolus	NC_029359.1	18218	13	https://ftp.ncbi.nlm.nih.gov/genomes/all/GCA/015/220/075/GCA_015220075.1_bFalRus1.pri
Falco tinnunculus	GCA_010332995.1	Falco tinnunculus	NC_011307.1	17663	13	https://ftp.ncbi.nlm.nih.gov/genomes/all/GCA/010/332/995/GCA_010332995.1_FalTin1.0
Falcunculus frontatus	GCA_013398115.1	Falcunculus frontatus	NC_053104.1	16604	13	https://ftp.ncbi.nlm.nih.gov/genomes/all/GCA/013/398/115/GCA_013398115.1_ASM1339811v1
Ficedula albicollis	GCA_000247815.2	Ficedula albicollis	NC_021621.1	16787	13	https://ftp.ncbi.nlm.nih.gov/genomes/all/GCA/000/247/815/GCA_000247815.2_FicAlb1.5
Formicarius rufipectus	GCA_013399695.1	Formicarius rufipectus	NC_051026.1	16781	13	https://ftp.ncbi.nlm.nih.gov/genomes/all/GCA/013/399/695/GCA_013399695.1_ASM1339969v1
Fregata magnificens	GCA_013389945.1	Fregata magnificens	NC_052797.1	16788	13	https://ftp.ncbi.nlm.nih.gov/genomes/all/GCA/013/389/945/GCA_013389945.1_ASM1338994v1
Fregetta grallaria	GCA_013399335.1	Fregetta grallaria	MN356296.1	20251	13	https://ftp.ncbi.nlm.nih.gov/genomes/all/GCA/013/399/335/GCA_013399335.1_ASM1339933v1
Fringilla coelebs coelebs	GCA_015532645.2	Fringilla coelebs	NC_025599.1	16801	13	https://ftp.ncbi.nlm.nih.gov/genomes/all/GCA/015/532/645/GCA_015532645.2_FrCoel.v2
Fulica atra	GCA_013372525.1	Fulica atra	NC_025500.1	17029	12	https://ftp.ncbi.nlm.nih.gov/genomes/all/GCA/013/372/525/GCA_013372525.1_Fatr_1.0
Fulmarus glacialis	GCA_000690835.1	Fulmarus glacialis	MN356131.1	18723	13	https://ftp.ncbi.nlm.nih.gov/genomes/all/GCA/000/690/835/GCA_000690835.1_ASM69083v1
Furnarius figulus	GCA_013397465.1	Furnarius figulus	NC_053074.1	16947	13	https://ftp.ncbi.nlm.nih.gov/genomes/all/GCA/013/397/465/GCA_013397465.1_ASM1339746v1
Galbula dea	GCA_013399015.1	Galbula dea	MN356220.1	18788	12	https://ftp.ncbi.nlm.nih.gov/genomes/all/GCA/013/399/015/GCA_013399015.1_ASM1339901v1
Gallirallus okinawae	GCA_002003005.1	Gallirallus okinawae	NC_012140.1	18404	13	https://ftp.ncbi.nlm.nih.gov/genomes/all/GCA/002/003/005/GCA_002003005.1_Gallirallus_okinawae_ver1.0
Gallus gallus	GCA_016699485.1	Gallus gallus	CM008858.1	16774	13	https://ftp.ncbi.nlm.nih.gov/genomes/all/GCA/016/699/485/GCA_016699485.1_bGalGal1.mat.broiler.GRCg7b
Gavia stellata	GCA_000690875.1	Gavia stellata	NC_007007.1	17573	13	https://ftp.ncbi.nlm.nih.gov/genomes/all/GCA/000/690/875/GCA_000690875.1_ASM69087v1
Geococcyx californianus	GCA_013389885.1	Geococcyx californianus	NC_011711.1	17091	13	https://ftp.ncbi.nlm.nih.gov/genomes/all/GCA/013/389/885/GCA_013389885.1_ASM1338988v1
Geospiza fortis	GCA_000277835.1	Geospiza fortis	KM891730.1	16858	13	https://ftp.ncbi.nlm.nih.gov/genomes/all/GCA/000/277/835/GCA_000277835.1_GeoFor_1.0
Glareola pratincola	GCA_013401295.1	Glareola pratincola	MN356161.1	15248	12	https://ftp.ncbi.nlm.nih.gov/genomes/all/GCA/013/401/295/GCA_013401295.1_ASM1340129v1
Glaucidium brasilianum	GCA_013399595.1	Glaucidium brasilianum	MN356303.1	17717	13	https://ftp.ncbi.nlm.nih.gov/genomes/all/GCA/013/399/595/GCA_013399595.1_ASM1339959v1
Gorsachius goisagi	GCA_018403395.1	Gorsachius goisagi	NC_028194.1	18562	13	https://ftp.ncbi.nlm.nih.gov/genomes/all/GCA/018/403/395/GCA_018403395.1_G_goisagi_scaffold_01
Grallaria varia	GCA_013396735.1	Grallaria varia	NC_051009.1	16901	13	https://ftp.ncbi.nlm.nih.gov/genomes/all/GCA/013/396/735/GCA_013396735.1_ASM1339673v1
Grantiella picta	GCA_013397955.1	Grantiella picta	NC_053098.1	16831	13	https://ftp.ncbi.nlm.nih.gov/genomes/all/GCA/013/397/955/GCA_013397955.1_ASM1339795v1
Grus americana	GCA_013390085.1	Grus americana	NC_020576.1	16651	13	https://ftp.ncbi.nlm.nih.gov/genomes/all/GCA/013/390/085/GCA_013390085.1_ASM1339008v1
Grus japonensis	GCA_002002985.1	Grus japonensis	NC_020575.1	16715	13	https://ftp.ncbi.nlm.nih.gov/genomes/all/GCA/002/002/985/GCA_002002985.1_Grus_japonensis_ver1.0
Grus monacha	GCA_012487855.1	Grus monacha	NC_020578.1	16650	13	https://ftp.ncbi.nlm.nih.gov/genomes/all/GCA/012/487/855/GCA_012487855.1_Gmonacha_1.0
Grus nigricollis	GCA_004360235.1	Grus nigricollis	NC_020579.1	16646	13	https://ftp.ncbi.nlm.nih.gov/genomes/all/GCA/004/360/235/GCA_004360235.1_ASM436023v1
Guaruba guarouba	GCA_011800095.1	Guaruba guarouba	NC_026031.1	17008	13	https://ftp.ncbi.nlm.nih.gov/genomes/all/GCA/011/800/095/GCA_011800095.1_ASM1180009v1
Gymnogyps californianus	GCA_018139145.1	Gymnogyps californianus	BK059163.1	16870	13	https://ftp.ncbi.nlm.nih.gov/genomes/all/GCA/018/139/145/GCA_018139145.1_ASM1813914v1
Gymnorhina tibicen	GCA_013399875.1	Gymnorhina tibicen	NC_051462.1	16866	13	https://ftp.ncbi.nlm.nih.gov/genomes/all/GCA/013/399/875/GCA_013399875.1_ASM1339987v1
Halcyon senegalensis	GCA_013397595.1	Halcyon senegalensis	NC_052813.1	17211	13	https://ftp.ncbi.nlm.nih.gov/genomes/all/GCA/013/397/595/GCA_013397595.1_ASM1339759v1
Haliaeetus albicilla	GCA_000691405.1	Haliaeetus albicilla	NC_040858.1	17719	13	https://ftp.ncbi.nlm.nih.gov/genomes/all/GCA/000/691/405/GCA_000691405.1_ASM69140v1
Haliaeetus leucocephalus	GCA_000737465.1	Haliaeetus leucocephalus	MN356134.1	18645	13	https://ftp.ncbi.nlm.nih.gov/genomes/all/GCA/000/737/465/GCA_000737465.1_Haliaeetus_leucocephalus-4.0
Heliornis fulica	GCA_013399135.1	Heliornis fulica	NC_025499.1	17009	13	https://ftp.ncbi.nlm.nih.gov/genomes/all/GCA/013/399/135/GCA_013399135.1_ASM1339913v1
Hemignathus wilsoni	GCA_009690805.1	Hemignathus wilsoni	MN356431.1	10572	10	https://ftp.ncbi.nlm.nih.gov/genomes/all/GCA/009/690/805/GCA_009690805.1_HemiWil1.0
Hemiprocne comata	GCA_013396855.1	Hemiprocne comata	CM036713.1	19122	13	https://ftp.ncbi.nlm.nih.gov/genomes/all/GCA/013/396/855/GCA_013396855.1_ASM1339685v1
Herpetotheres cachinnans	GCA_013399355.1	Herpetotheres cachinnans	NC_052801.1	17329	13	https://ftp.ncbi.nlm.nih.gov/genomes/all/GCA/013/399/355/GCA_013399355.1_ASM1339935v1
Heteronetta atricapilla	GCA_011075105.1	Heteronetta atricapilla	CM021836.1	16723	13	https://ftp.ncbi.nlm.nih.gov/genomes/all/GCA/011/075/105/GCA_011075105.1_BPBGC_Hatr_1.0
Himantopus himantopus	GCA_013400095.1	Himantopus himantopus	NC_035423.1	17378	13	https://ftp.ncbi.nlm.nih.gov/genomes/all/GCA/013/400/095/GCA_013400095.1_ASM1340009v1
Hippolais icterina	GCA_013400075.1	Hippolais icterina	MN356249.1	14907	12	https://ftp.ncbi.nlm.nih.gov/genomes/all/GCA/013/400/075/GCA_013400075.1_ASM1340007v1
Hirundo rustica	GCA_015227805.2	Hirundo rustica	MN356225.1	16205	12	https://ftp.ncbi.nlm.nih.gov/genomes/all/GCA/015/227/805/GCA_015227805.2_bHirRus1.pri.v2/
Hirundo rustica rustica	GCA_003692655.1	Hirundo rustica	MN356225.1	16205	12	https://ftp.ncbi.nlm.nih.gov/genomes/all/GCA/003/692/655/GCA_003692655.1_Chelidonia
Horornis vulcanius	GCA_013401035.1	Horornis vulcanius	NC_053103.1	16990	13	https://ftp.ncbi.nlm.nih.gov/genomes/all/GCA/013/401/035/GCA_013401035.1_ASM1340103v1
Hylia prasina	GCA_013397195.1	Hylia prasina	NC_051033.1	16891	13	https://ftp.ncbi.nlm.nih.gov/genomes/all/GCA/013/397/195/GCA_013397195.1_ASM1339719v1
Hypocryptadius cinnamomeus	GCA_013400635.1	Hypocryptadius cinnamomeus	NC_053073.1	16864	13	https://ftp.ncbi.nlm.nih.gov/genomes/all/GCA/013/400/635/GCA_013400635.1_ASM1340063v1
Ibidorhyncha struthersii	GCA_013398815.1	Ibidorhyncha struthersii	MN356371.1	17066	13	https://ftp.ncbi.nlm.nih.gov/genomes/all/GCA/013/398/815/GCA_013398815.1_ASM1339881v1
Ifrita kowaldi	GCA_013398055.1	Ifrita kowaldi	NC_053092.1	16925	13	https://ftp.ncbi.nlm.nih.gov/genomes/all/GCA/013/398/055/GCA_013398055.1_ASM1339805v1
Illadopsis cleaveri	GCA_013399915.1	Illadopsis cleaveri	MN356236.1	14901	12	https://ftp.ncbi.nlm.nih.gov/genomes/all/GCA/013/399/915/GCA_013399915.1_ASM1339991v1
Indicator maculatus	GCA_013399975.1	Indicator maculatus	NC_039889.1	16841	13	https://ftp.ncbi.nlm.nih.gov/genomes/all/GCA/013/399/975/GCA_013399975.1_ASM1339997v1
Irena cyanogastra	GCA_013397155.1	Irena cyanogastra	NC_051018.1	16837	13	https://ftp.ncbi.nlm.nih.gov/genomes/all/GCA/013/397/155/GCA_013397155.1_ASM1339715v1
Jacana jacana	GCA_013400555.1	Jacana jacana	NC_024069.1	16975	13	https://ftp.ncbi.nlm.nih.gov/genomes/all/GCA/013/400/555/GCA_013400555.1_ASM1340055v1
Junco hyemalis	GCA_003829775.1	Junco hyemalis	FJ236293.1	15573	13	https://ftp.ncbi.nlm.nih.gov/genomes/all/GCA/003/829/775/GCA_003829775.1_ASM382977v1
Lagopus muta japonica	GCA_004320205.1	Lagopus muta	NC_034002.1	16683	13	https://ftp.ncbi.nlm.nih.gov/genomes/all/GCA/004/320/205/GCA_004320205.1_Lagopus_muta_japonica_ver1.0
Lanius collurio	GCA_020086605.1	Lanius collurio	MN122863.1	16820	13	https://ftp.ncbi.nlm.nih.gov/genomes/all/GCA/020/086/605/GCA_020086605.1_ASM2008660v1
Lanius ludovicianus	GCA_013397235.1	Lanius ludovicianus	NC_051030.1	16947	13	https://ftp.ncbi.nlm.nih.gov/genomes/all/GCA/013/397/235/GCA_013397235.1_ASM1339723v1
Larus smithsonianus	GCA_013400295.1	Larus smithsonianus	MN356257.1	15746	13	https://ftp.ncbi.nlm.nih.gov/genomes/all/GCA/013/400/295/GCA_013400295.1_ASM1340029v1
Leiothrix lutea	GCA_013400445.1	Leiothrix lutea	NC_020427.1	17615	13	https://ftp.ncbi.nlm.nih.gov/genomes/all/GCA/013/400/445/GCA_013400445.1_ASM1340044v1
Lepidothrix coronata	GCA_001604755.1	Lepidothrix coronata	NC_053111.1	17187	13	https://ftp.ncbi.nlm.nih.gov/genomes/all/GCA/001/604/755/GCA_001604755.1_Lepidothrix_coronata-1.0
Leptocoma aspasia	GCA_013399835.1	Leptocoma aspasia	NC_051024.1	16919	13	https://ftp.ncbi.nlm.nih.gov/genomes/all/GCA/013/399/835/GCA_013399835.1_ASM1339983v1
Leucopsar rothschildi	GCA_014363365.1	Leucopsar rothschildi	NC_053050.1	16845	13	https://ftp.ncbi.nlm.nih.gov/genomes/all/GCA/014/363/365/GCA_014363365.1_L_rothschildi_scaffold_01
Limosa lapponica baueri	GCA_002844005.1	Limosa lapponica baueri	KX371106.1	16732	13	https://ftp.ncbi.nlm.nih.gov/genomes/all/GCA/002/844/005/GCA_002844005.1_Godwit_v1
Locustella ochotensis	GCA_013400155.1	Locustella ochotensis	MN356242.1	16152	12	https://ftp.ncbi.nlm.nih.gov/genomes/all/GCA/013/400/155/GCA_013400155.1_ASM1340015v1
Lonchura striata domestica	GCA_005870125.1	Lonchura striata domestica	CM016794.1	16813	13	https://ftp.ncbi.nlm.nih.gov/genomes/all/GCA/005/870/125/GCA_005870125.1_lonStrDom2
Lophotis ruficrista	GCA_013396455.1	Lophotis ruficrista	MN356169.1	15773	13	https://ftp.ncbi.nlm.nih.gov/genomes/all/GCA/013/396/455/GCA_013396455.1_ASM1339645v1
Lorius garrulus	GCA_010014925.1	Lorius garrulus	AB177951.1	907	1	https://ftp.ncbi.nlm.nih.gov/genomes/all/GCA/010/014/925/GCA_010014925.1_ASM1001492v1
Loxia curvirostra	GCA_013398455.1	Loxia curvirostra	NC_025623.1	16805	13	https://ftp.ncbi.nlm.nih.gov/genomes/all/GCA/013/398/455/GCA_013398455.1_ASM1339845v1
Loxia leucoptera	GCA_013396895.1	Loxia leucoptera	NC_051015.1	16811	13	https://ftp.ncbi.nlm.nih.gov/genomes/all/GCA/013/396/895/GCA_013396895.1_ASM1339689v1
Lyrurus tetrix tetrix	GCA_000586395.1	Lyrurus tetrix	NC_024554.1	16677	13	https://ftp.ncbi.nlm.nih.gov/genomes/all/GCA/000/586/395/GCA_000586395.1_tetTet1
Machaerirhynchus nigripectus	GCA_013397975.1	Machaerirhynchus nigripectus	NC_053094.1	16883	13	https://ftp.ncbi.nlm.nih.gov/genomes/all/GCA/013/397/975/GCA_013397975.1_ASM1339797v1
Malurus cyaneus samueli	GCA_009741485.1	Malurus cyaneus samueli	CM019239.1	17031	13	https://ftp.ncbi.nlm.nih.gov/genomes/all/GCA/009/741/485/GCA_009741485.1_mCya_1.0
Malurus elegans	GCA_013397995.1	Malurus elegans	NC_053095.1	16811	13	https://ftp.ncbi.nlm.nih.gov/genomes/all/GCA/013/397/995/GCA_013397995.1_ASM1339799v1
Megadyptes antipodes antipodes	GCA_010078485.1	Megadyptes antipodes	MK761003.1	15541	12	https://ftp.ncbi.nlm.nih.gov/genomes/all/GCA/010/078/485/GCA_010078485.1_BGI_Mant.V1
Melanerpes aurifrons	GCA_011125475.1	Melanerpes aurifrons	CM022134.1	16844	13	https://ftp.ncbi.nlm.nih.gov/genomes/all/GCA/011/125/475/GCA_011125475.1_OU_Melaur_1
Melanocharis versteri	GCA_013397845.1	Melanocharis versteri	NC_053089.1	16752	13	https://ftp.ncbi.nlm.nih.gov/genomes/all/GCA/013/397/845/GCA_013397845.1_ASM1339784v1
Meleagris gallopavo	GCA_000146605.4	Meleagris gallopavo	NC_010195.2	16719	13	https://ftp.ncbi.nlm.nih.gov/genomes/all/GCA/000/146/605/GCA_000146605.4_Turkey_5.1
Melopsittacus undulatus	GCA_012275295.1	Melopsittacus undulatus	CM022664.1	18200	13	https://ftp.ncbi.nlm.nih.gov/genomes/all/GCA/012/275/295/GCA_012275295.1_bMelUnd1.mat.Z
Melospiza melodia	GCA_013398205.1	Melospiza melodia	FJ236290.1	15574	13	https://ftp.ncbi.nlm.nih.gov/genomes/all/GCA/013/398/205/GCA_013398205.1_ASM1339820v1/
Melospiza melodia maxima	GCA_011057915.1	Melospiza melodia	FJ236290.1	15574	13	https://ftp.ncbi.nlm.nih.gov/genomes/all/GCA/011/057/915/GCA_011057915.1_Mmel_1.0
Menura novaehollandiae	GCA_013396355.1	Menura novaehollandiae	NC_007883.1	17839	13	https://ftp.ncbi.nlm.nih.gov/genomes/all/GCA/013/396/355/GCA_013396355.1_ASM1339635v1
Merops nubicus	GCA_000691845.1	Merops nubicus	CM020464.1	18687	13	https://ftp.ncbi.nlm.nih.gov/genomes/all/GCA/000/691/845/GCA_000691845.1_ASM69184v1
Mesembrinibis cayennensis	GCA_013399675.1	Mesembrinibis cayennensis	NC_050835.1	16738	13	https://ftp.ncbi.nlm.nih.gov/genomes/all/GCA/013/399/675/GCA_013399675.1_ASM1339967v1
Mesitornis unicolor	GCA_000695765.1	Mesitornis unicolor	MN356138.1	15762	13	https://ftp.ncbi.nlm.nih.gov/genomes/all/GCA/000/695/765/GCA_000695765.1_ASM69576v1
Mionectes macconnelli	GCA_013397495.1	Mionectes macconnelli	MN356288.1	14871	12	https://ftp.ncbi.nlm.nih.gov/genomes/all/GCA/013/397/495/GCA_013397495.1_ASM1339749v1
Molothrus ater	GCA_012460135.1	Molothrus ater	NC_051468.1	16758	13	https://ftp.ncbi.nlm.nih.gov/genomes/all/GCA/012/460/135/GCA_012460135.1_BPBGC_Mater_1.0
Montifringilla adamsi	GCA_017590115.1	Montifringilla adamsi	NC_025913.1	16912	13	https://ftp.ncbi.nlm.nih.gov/genomes/all/GCA/017/590/115/GCA_017590115.1_ASM1759011v1
Motacilla alba	GCA_013397355.1	Motacilla alba	NC_029229.1	16826	13	https://ftp.ncbi.nlm.nih.gov/genomes/all/GCA/013/397/355/GCA_013397355.1_ASM1339735v1
Motacilla alba alba	GCA_015832195.1	Motacilla alba	NC_029229.1	16826	13	https://ftp.ncbi.nlm.nih.gov/genomes/all/GCA/015/832/195/GCA_015832195.1_Motacilla_alba_V1.0_pri
Motacilla tschutschensis	GCA_018904545.1	Motacilla tschutschensis	MN217252.1	16829	13	https://ftp.ncbi.nlm.nih.gov/genomes/all/GCA/018/904/545/GCA_018904545.1_ASM1890454v1
Myiagra hebetior	GCA_013397015.1	Myiagra hebetior	NC_051022.1	16928	13	https://ftp.ncbi.nlm.nih.gov/genomes/all/GCA/013/397/015/GCA_013397015.1_ASM1339701v1
Myiopsitta monachus	GCA_017639245.1	Myiopsitta monachus	NC_027844.1	16755	13	https://ftp.ncbi.nlm.nih.gov/genomes/all/GCA/017/639/245/GCA_017639245.1_MMon_1.0
Mystacornis crossleyi	GCA_013400655.1	Mystacornis crossleyi	NC_053072.1	16915	13	https://ftp.ncbi.nlm.nih.gov/genomes/all/GCA/013/400/655/GCA_013400655.1_ASM1340065v1
Neodrepanis coruscans	GCA_013400695.1	Neodrepanis coruscans	NC_053071.1	16950	13	https://ftp.ncbi.nlm.nih.gov/genomes/all/GCA/013/400/695/GCA_013400695.1_ASM1340069v1
Neopipo cinnamomea	GCA_013397415.1	Neopipo cinnamomea	NC_053075.1	17059	13	https://ftp.ncbi.nlm.nih.gov/genomes/all/GCA/013/397/415/GCA_013397415.1_ASM1339741v1
Nesospiza acunhae	GCA_013398715.1	Nesospiza acunhae	NC_051469.1	16783	13	https://ftp.ncbi.nlm.nih.gov/genomes/all/GCA/013/398/715/GCA_013398715.1_ASM1339871v1
Nestor notabilis	GCA_000696875.1	Nestor notabilis	NC_027845.1	16818	13	https://ftp.ncbi.nlm.nih.gov/genomes/all/GCA/000/696/875/GCA_000696875.1_ASM69687v1
Nettapus auritus	GCA_011076525.1	Nettapus auritus	CM021833.1	25624	13	https://ftp.ncbi.nlm.nih.gov/genomes/all/GCA/011/076/525/GCA_011076525.1_BPBGC_Naur_1.0
Nicator chloris	GCA_013400495.1	Nicator chloris	NC_053062.1	17006	13	https://ftp.ncbi.nlm.nih.gov/genomes/all/GCA/013/400/495/GCA_013400495.1_ASM1340049v1
Nipponia nippon	GCA_000708225.1	Nipponia nippon	NC_008132.1	16732	13	https://ftp.ncbi.nlm.nih.gov/genomes/all/GCA/000/708/225/GCA_000708225.1_ASM70822v1
Nisaetus nipalensis	GCA_012487455.1	Nisaetus nipalensis	NC_007598.1	17667	13	https://ftp.ncbi.nlm.nih.gov/genomes/all/GCA/012/487/455/GCA_012487455.1_Nnipalensis_1.0
Nothocercus julius	GCA_013398735.1	Nothocercus julius	NC_052818.1	16695	13	https://ftp.ncbi.nlm.nih.gov/genomes/all/GCA/013/398/735/GCA_013398735.1_ASM1339873v1
Nothocercus nigrocapillus	GCA_013398345.1	Nothocercus nigrocapillus	NC_052819.1	16637	13	https://ftp.ncbi.nlm.nih.gov/genomes/all/GCA/013/398/345/GCA_013398345.1_ASM1339834v1
Nothoprocta ornata	GCA_013398335.1	Nothoprocta ornata	NC_052820.1	17012	13	https://ftp.ncbi.nlm.nih.gov/genomes/all/GCA/013/398/335/GCA_013398335.1_ASM1339833v1
Nothoprocta pentlandii	GCA_013398315.1	Nothoprocta pentlandii	NC_052821.1	17013	13	https://ftp.ncbi.nlm.nih.gov/genomes/all/GCA/013/398/315/GCA_013398315.1_ASM1339831v1
Nothoprocta perdicaria	GCA_003342845.1	Nothoprocta perdicaria	NC_052826.1	16964	13	https://ftp.ncbi.nlm.nih.gov/genomes/all/GCA/003/342/845/GCA_003342845.1_notPer1
Notiomystis cincta	GCA_013398075.1	Notiomystis cincta	NC_029140.1	18645	13	https://ftp.ncbi.nlm.nih.gov/genomes/all/GCA/013/398/075/GCA_013398075.1_ASM1339807v1
Numida meleagris	GCA_002078875.2	Numida meleagris	NC_034374.1	16785	13	https://ftp.ncbi.nlm.nih.gov/genomes/all/GCA/002/078/875/GCA_002078875.2_NumMel1.0
Nyctibius bracteatus	GCA_013396595.1	Nyctibius bracteatus	MN356162.1	18041	13	https://ftp.ncbi.nlm.nih.gov/genomes/all/GCA/013/396/595/GCA_013396595.1_ASM1339659v1
Nyctibius grandis	GCA_013368605.1	Nyctibius grandis	CM023771.1	21413	13	https://ftp.ncbi.nlm.nih.gov/genomes/all/GCA/013/368/605/GCA_013368605.1_bNycGra1.pri
Nycticryphes semicollaris	GCA_013400055.1	Nycticryphes semicollaris	MN356246.1	18584	13	https://ftp.ncbi.nlm.nih.gov/genomes/all/GCA/013/400/055/GCA_013400055.1_ASM1340005v1
Nyctiprogne leucopyga	GCA_013399395.1	Nyctiprogne leucopyga	MN356292.1	14892	12	https://ftp.ncbi.nlm.nih.gov/genomes/all/GCA/013/399/395/GCA_013399395.1_ASM1339939v1
Nymphicus hollandicus	GCA_009823435.1	Nymphicus hollandicus	NC_015192.1	16781	13	https://ftp.ncbi.nlm.nih.gov/genomes/all/GCA/009/823/435/GCA_009823435.1_ASM982343v1
Oceanites oceanicus	GCA_013396615.1	Oceanites oceanicus	NC_052777.1	17655	13	https://ftp.ncbi.nlm.nih.gov/genomes/all/GCA/013/396/615/GCA_013396615.1_ASM1339661v1
Odontophorus gujanensis	GCA_013399175.1	Odontophorus gujanensis	NC_052784.1	16705	13	https://ftp.ncbi.nlm.nih.gov/genomes/all/GCA/013/399/175/GCA_013399175.1_ASM1339917v1
Oenanthe oenanthe	GCA_013399995.1	Oenanthe oenanthe	NC_051036.1	16826	13	https://ftp.ncbi.nlm.nih.gov/genomes/all/GCA/013/399/995/GCA_013399995.1_ASM1339999v1
Onychorhynchus coronatus	GCA_013397825.1	Onychorhynchus coronatus	NC_053085.1	17033	13	https://ftp.ncbi.nlm.nih.gov/genomes/all/GCA/013/397/825/GCA_013397825.1_ASM1339782v1
Opisthocomus hoazin	GCA_000692075.1	Opisthocomus hoazin	MN356140.1	15240	12	https://ftp.ncbi.nlm.nih.gov/genomes/all/GCA/000/692/075/GCA_000692075.1_ASM69207v1
Oreocharis arfaki	GCA_013398015.1	Oreocharis arfaki	NC_053093.1	17391	13	https://ftp.ncbi.nlm.nih.gov/genomes/all/GCA/013/398/015/GCA_013398015.1_ASM1339801v1
Oreotrochilus melanogaster	GCA_013400995.1	Oreotrochilus melanogaster	NC_027454.1	16859	13	https://ftp.ncbi.nlm.nih.gov/genomes/all/GCA/013/400/995/GCA_013400995.1_ASM1340099v1
Origma solitaria	GCA_013397895.1	Origma solitaria	NC_053100.1	16846	13	https://ftp.ncbi.nlm.nih.gov/genomes/all/GCA/013/397/895/GCA_013397895.1_ASM1339789v1
Oriolus oriolus	GCA_013400235.1	Oriolus oriolus	NC_053058.1	16794	13	https://ftp.ncbi.nlm.nih.gov/genomes/all/GCA/013/400/235/GCA_013400235.1_ASM1340023v1
Orthonyx spaldingii	GCA_013397795.1	Orthonyx spaldingii	NC_053086.1	16916	13	https://ftp.ncbi.nlm.nih.gov/genomes/all/GCA/013/397/795/GCA_013397795.1_ASM1339779v1
Otus sunia	GCA_010365825.1	Otus sunia	NC_041422.1	17835	13	https://ftp.ncbi.nlm.nih.gov/genomes/all/GCA/010/365/825/GCA_010365825.1_OtuSun1.0
Oxylabes madagascariensis	GCA_013400675.1	Oxylabes madagascariensis	MN356284.1	14897	12	https://ftp.ncbi.nlm.nih.gov/genomes/all/GCA/013/400/675/GCA_013400675.1_ASM1340067v1
Oxyruncus cristatus	GCA_013399855.1	Oxyruncus cristatus	NC_053052.1	17089	13	https://ftp.ncbi.nlm.nih.gov/genomes/all/GCA/013/399/855/GCA_013399855.1_ASM1339985v1
Oxyura jamaicensis	GCA_011077185.1	Oxyura jamaicensis	CM021834.1	15914	13	https://ftp.ncbi.nlm.nih.gov/genomes/all/GCA/011/077/185/GCA_011077185.1_BPBGC_Ojam_1.0
Pachycephala philippinensis	GCA_013397055.1	Pachycephala philippinensis	NC_051019.1	16893	13	https://ftp.ncbi.nlm.nih.gov/genomes/all/GCA/013/397/055/GCA_013397055.1_ASM1339705v1
Pachyramphus minor	GCA_013397135.1	Pachyramphus minor	NC_051035.1	17019	13	https://ftp.ncbi.nlm.nih.gov/genomes/all/GCA/013/397/135/GCA_013397135.1_ASM1339713v1
Pandion haliaetus	GCA_013401275.1	Pandion haliaetus	NC_008550.1	17864	13	https://ftp.ncbi.nlm.nih.gov/genomes/all/GCA/013/401/275/GCA_013401275.1_ASM1340127v1
Panurus biarmicus	GCA_013398035.1	Panurus biarmicus	NC_053106.1	17009	13	https://ftp.ncbi.nlm.nih.gov/genomes/all/GCA/013/398/035/GCA_013398035.1_ASM1339803v1
Paradisaea raggiana	GCA_003713265.1	Paradisaea raggiana	NC_053056.1	16910	13	https://ftp.ncbi.nlm.nih.gov/genomes/all/GCA/003/713/265/GCA_003713265.1_ParRag_1.0
Pardalotus punctatus	GCA_013400915.1	Pardalotus punctatus	NC_053099.1	16919	13	https://ftp.ncbi.nlm.nih.gov/genomes/all/GCA/013/400/915/GCA_013400915.1_ASM1340091v1
Parus major	GCA_001522545.3	Parus major	NC_040875.1	16777	13	https://ftp.ncbi.nlm.nih.gov/genomes/all/GCA/001/522/545/GCA_001522545.3_Parus_major1.1
Passer domesticus	GCA_001700915.1	Passer domesticus	CM004555.1	16809	13	https://ftp.ncbi.nlm.nih.gov/genomes/all/GCA/001/700/915/GCA_001700915.1_Passer_domesticus-1.0
Passer montanus	GCA_014805655.1	Passer montanus	NC_024821.1	16887	13	https://ftp.ncbi.nlm.nih.gov/genomes/all/GCA/014/805/655/GCA_014805655.1_ASM1480565v1
Passerina amoena	GCA_013401095.1	Passerina amoena	MN356416.1	17188	13	https://ftp.ncbi.nlm.nih.gov/genomes/all/GCA/013/401/095/GCA_013401095.1_ASM1340109v1
Patagioenas fasciata monilis	GCA_002029285.1	Patagioenas fasciata monilis	KX902239.1	16970	13	https://ftp.ncbi.nlm.nih.gov/genomes/all/GCA/002/029/285/GCA_002029285.1_NIATT_ARIZONA
Pavo cristatus	GCA_005519975.1	Pavo cristatus	NC_024533.1	16686	13	https://ftp.ncbi.nlm.nih.gov/genomes/all/GCA/005/519/975/GCA_005519975.1_AIIM_Pcri_1.0
Pavo muticus	GCA_016647715.1	Pavo muticus	NC_012897.1	16698	13	https://ftp.ncbi.nlm.nih.gov/genomes/all/GCA/016/647/715/GCA_016647715.1_ASM1664771v1
Pedionomus torquatus	GCA_013398155.1	Pedionomus torquatus	MN356368.1	13807	11	https://ftp.ncbi.nlm.nih.gov/genomes/all/GCA/013/398/155/GCA_013398155.1_ASM1339815v1
Pelecanoides urinatrix	GCA_013400755.1	Pelecanoides urinatrix	NC_052809.1	17077	13	https://ftp.ncbi.nlm.nih.gov/genomes/all/GCA/013/400/755/GCA_013400755.1_ASM1340075v1
Pelecanus crispus	GCA_000687375.1	Pelecanus crispus	MN356141.1	16012	13	https://ftp.ncbi.nlm.nih.gov/genomes/all/GCA/000/687/375/GCA_000687375.1_ASM68737v1
Penelope pileata	GCA_013396635.1	Penelope pileata	NC_052778.1	16660	13	https://ftp.ncbi.nlm.nih.gov/genomes/all/GCA/013/396/635/GCA_013396635.1_ASM1339663v1
Peucedramus taeniatus	GCA_013400575.1	Peucedramus taeniatus	NC_053066.1	16817	13	https://ftp.ncbi.nlm.nih.gov/genomes/all/GCA/013/400/575/GCA_013400575.1_ASM1340057v1
Phaethon lepturus	GCA_000687285.1	Phaethon lepturus	NC_027275.1	17773	13	https://ftp.ncbi.nlm.nih.gov/genomes/all/GCA/000/687/285/GCA_000687285.1_ASM68728v1
Phainopepla nitens	GCA_013400175.1	Phainopepla nitens	NC_053061.1	16847	13	https://ftp.ncbi.nlm.nih.gov/genomes/all/GCA/013/400/175/GCA_013400175.1_ASM1340017v1
Phalacrocorax carbo	GCA_000708925.1	Phalacrocorax carbo	NC_027267.1	18995	13	https://ftp.ncbi.nlm.nih.gov/genomes/all/GCA/000/708/925/GCA_000708925.1_ASM70892v1
Phalacrocorax harrisi	GCA_002173475.1	Phalacrocorax harrisi	MN356401.1	9720	8	https://ftp.ncbi.nlm.nih.gov/genomes/all/GCA/002/173/475/GCA_002173475.1_Pharrisi_ref_V1
Phalacrocorax pelagicus	GCA_002173435.1	Phalacrocorax pelagicus	MN356399.1	15691	12	https://ftp.ncbi.nlm.nih.gov/genomes/all/GCA/002/173/435/GCA_002173435.1_ASM217343v1
Phasianus colchicus	GCA_004143745.1	Phasianus colchicus	NC_015526.1	16692	13	https://ftp.ncbi.nlm.nih.gov/genomes/all/GCA/004/143/745/GCA_004143745.1_ASM414374v1
Pheucticus melanocephalus	GCA_013398405.1	Pheucticus melanocephalus	MN356417.1	16798	13	https://ftp.ncbi.nlm.nih.gov/genomes/all/GCA/013/398/405/GCA_013398405.1_ASM1339840v1
Phoebastria albatrus	GCA_014363385.1	Phoebastria albatrus	NC_026190.1	19097	13	https://ftp.ncbi.nlm.nih.gov/genomes/all/GCA/014/363/385/GCA_014363385.1_P_albatrus_scaffold_01
Phoenicopterus ruber ruber	GCA_009819775.1	Phoenicopterus ruber	NC_027934.1	17476	13	https://ftp.ncbi.nlm.nih.gov/genomes/all/GCA/009/819/775/GCA_009819775.1_bPhoRub2.pri
Phylloscopus plumbeitarsus	GCA_001655115.1	Phylloscopus plumbeitarsus	AB362468.1	1951	2	https://ftp.ncbi.nlm.nih.gov/genomes/all/GCA/001/655/115/GCA_001655115.1_GWplu1.0
Phylloscopus trochilus acredula	GCA_002305835.1	Phylloscopus trochilus	MN356402.1	5965	3	https://ftp.ncbi.nlm.nih.gov/genomes/all/GCA/002/305/835/GCA_002305835.1_ASM230583v1
Phylloscopus trochilus trochilus	GCA_016584745.1	Phylloscopus trochilus	MN356402.1	5965	3	https://ftp.ncbi.nlm.nih.gov/genomes/all/GCA/016/584/745/GCA_016584745.1_LUNI_Phtr_3
Piaya cayana	GCA_013389865.1	Piaya cayana	NC_052804.1	17007	13	https://ftp.ncbi.nlm.nih.gov/genomes/all/GCA/013/389/865/GCA_013389865.1_ASM1338986v1
Picathartes gymnocephalus	GCA_013390045.1	Picathartes gymnocephalus	NC_053078.1	16887	13	https://ftp.ncbi.nlm.nih.gov/genomes/all/GCA/013/390/045/GCA_013390045.1_ASM1339004v1
Piprites chloris	GCA_013399295.1	Piprites chloris	MN356298.1	14882	12	https://ftp.ncbi.nlm.nih.gov/genomes/all/GCA/013/399/295/GCA_013399295.1_ASM1339929v1
Pitta sordida	GCA_013390025.1	Pitta sordida	NC_051463.1	17733	13	https://ftp.ncbi.nlm.nih.gov/genomes/all/GCA/013/390/025/GCA_013390025.1_ASM1339002v1
Ploceus nigricollis	GCA_013399945.1	Ploceus nigricollis	NC_051038.1	16903	13	https://ftp.ncbi.nlm.nih.gov/genomes/all/GCA/013/399/945/GCA_013399945.1_ASM1339994v1
Pluvialis apricaria	GCA_017639485.1	Pluvialis apricaria	CM030045.1	20624	13	https://ftp.ncbi.nlm.nih.gov/genomes/all/GCA/017/639/485/GCA_017639485.1_bPluApr1.pri
Pluvianellus socialis	GCA_013400795.1	Pluvianellus socialis	MN356314.1	18893	13	https://ftp.ncbi.nlm.nih.gov/genomes/all/GCA/013/400/795/GCA_013400795.1_ASM1340079v1
Podargus strigoides	GCA_013399755.1	Podargus strigoides	MN356205.1	16242	13	https://ftp.ncbi.nlm.nih.gov/genomes/all/GCA/013/399/755/GCA_013399755.1_ASM1339975v1
Podiceps cristatus	GCA_000699545.1	Podiceps cristatus	NC_008140.1	16134	12	https://ftp.ncbi.nlm.nih.gov/genomes/all/GCA/000/699/545/GCA_000699545.1_ASM69954v1
Podilymbus podiceps	GCA_013399565.1	Podilymbus podiceps	MN356304.1	17433	11	https://ftp.ncbi.nlm.nih.gov/genomes/all/GCA/013/399/565/GCA_013399565.1_ASM1339956v1
Poecile atricapillus	GCA_011421415.1	Poecile atricapillus	CM022184.1	16859	13	https://ftp.ncbi.nlm.nih.gov/genomes/all/GCA/011/421/415/GCA_011421415.1_CUB_Patr_1.0
Pogoniulus pusillus	GCA_015220805.1	Pogoniulus pusillus	CM026823.1	19935	13	https://ftp.ncbi.nlm.nih.gov/genomes/all/GCA/015/220/805/GCA_015220805.1_bPogPus1.pri
Pogoniulus pusillus pusillus	GCA_016859755.1	Pogoniulus pusillus	CM026823.1	19935	13	https://ftp.ncbi.nlm.nih.gov/genomes/all/GCA/016/859/755/GCA_016859755.1_ASM1685975v1
Polioptila caerulea	GCA_013397295.1	Polioptila caerulea	NC_051031.1	16764	13	https://ftp.ncbi.nlm.nih.gov/genomes/all/GCA/013/397/295/GCA_013397295.1_ASM1339729v1
Pomatorhinus ruficollis	GCA_013401195.1	Pomatorhinus ruficollis	NC_029769.1	17009	13	https://ftp.ncbi.nlm.nih.gov/genomes/all/GCA/013/401/195/GCA_013401195.1_ASM1340119v1
Pomatostomus ruficeps	GCA_013400735.1	Pomatostomus ruficeps	NC_051464.1	15673	13	https://ftp.ncbi.nlm.nih.gov/genomes/all/GCA/013/400/735/GCA_013400735.1_ASM1340073v1
Probosciger aterrimus	GCA_013397665.1	Probosciger aterrimus	MN356334.1	15368	13	https://ftp.ncbi.nlm.nih.gov/genomes/all/GCA/013/397/665/GCA_013397665.1_ASM1339766v1
Prunella fulvescens	GCA_013400715.1	Prunella fulvescens	NC_035747.1	16837	13	https://ftp.ncbi.nlm.nih.gov/genomes/all/GCA/013/400/715/GCA_013400715.1_ASM1340071v1
Prunella himalayana	GCA_013398875.1	Prunella himalayana	NC_053082.1	16842	13	https://ftp.ncbi.nlm.nih.gov/genomes/all/GCA/013/398/875/GCA_013398875.1_ASM1339887v1
Pseudopodoces humilis	GCA_000331425.1	Pseudopodoces humilis	NC_014341.1	16809	13	https://ftp.ncbi.nlm.nih.gov/genomes/all/GCA/000/331/425/GCA_000331425.1_PseHum1.0
Psilopogon haemacephalus	GCA_013396835.1	Psilopogon haemacephalus	NC_052781.1	16839	13	https://ftp.ncbi.nlm.nih.gov/genomes/all/GCA/013/396/835/GCA_013396835.1_ASM1339683v1
Psittacula krameri	GCA_002870145.1	Psittacula krameri	MN065674.1	16413	13	https://ftp.ncbi.nlm.nih.gov/genomes/all/GCA/002/870/145/GCA_002870145.1_P.krameri1.0
Psittacus erithacus	GCA_009867235.1	Psittacus erithacus	NC_027847.1	17962	12	https://ftp.ncbi.nlm.nih.gov/genomes/all/GCA/009/867/235/GCA_009867235.1_ASM986723v1
Psophia crepitans	GCA_013399095.1	Psophia crepitans	NC_052785.1	17138	13	https://ftp.ncbi.nlm.nih.gov/genomes/all/GCA/013/399/095/GCA_013399095.1_ASM1339909v1
Pterocles burchelli	GCA_013397535.1	Pterocles burchelli	NC_052814.1	18290	13	https://ftp.ncbi.nlm.nih.gov/genomes/all/GCA/013/397/535/GCA_013397535.1_ASM1339753v1
Pterocles gutturalis	GCA_000699245.1	Pterocles gutturalis	CM020177.1	24468	13	https://ftp.ncbi.nlm.nih.gov/genomes/all/GCA/000/699/245/GCA_000699245.1_ASM69924v1
Pteruthius melanotis	GCA_013401235.1	Pteruthius melanotis	NC_053108.1	16862	13	https://ftp.ncbi.nlm.nih.gov/genomes/all/GCA/013/401/235/GCA_013401235.1_ASM1340123v1
Ptilonorhynchus violaceus	GCA_013397565.1	Ptilonorhynchus violaceus	MN356313.1	16768	13	https://ftp.ncbi.nlm.nih.gov/genomes/all/GCA/013/397/565/GCA_013397565.1_ASM1339756v1
Ptilorrhoa leucosticta	GCA_013396485.1	Ptilorrhoa leucosticta	NC_051006.1	16874	13	https://ftp.ncbi.nlm.nih.gov/genomes/all/GCA/013/396/485/GCA_013396485.1_ASM1339648v1
Pycnonotus jocosus	GCA_013400435.1	Pycnonotus jocosus	NC_053063.1	16928	13	https://ftp.ncbi.nlm.nih.gov/genomes/all/GCA/013/400/435/GCA_013400435.1_ASM1340043v1
Pygoscelis adeliae	GCA_000699105.1	Pygoscelis adeliae	NC_021137.1	17486	13	https://ftp.ncbi.nlm.nih.gov/genomes/all/GCA/000/699/105/GCA_000699105.1_ASM69910v1
Pygoscelis antarcticus	GCA_010078415.1	Pygoscelis antarcticus	NC_021474.1	15972	13	https://ftp.ncbi.nlm.nih.gov/genomes/all/GCA/010/078/415/GCA_010078415.1_BGI_Pant.V1
Pygoscelis papua	GCA_010090195.1	Pygoscelis papua	NC_037702.1	16712	13	https://ftp.ncbi.nlm.nih.gov/genomes/all/GCA/010/090/195/GCA_010090195.1_BGI_Ppap.V1
Quiscalus mexicanus	GCA_013399035.1	Quiscalus mexicanus	NC_051021.1	16772	13	https://ftp.ncbi.nlm.nih.gov/genomes/all/GCA/013/399/035/GCA_013399035.1_ASM1339903v1
Ramphastos sulfuratus	GCA_013399055.1	Ramphastos sulfuratus	MN356196.1	14854	12	https://ftp.ncbi.nlm.nih.gov/genomes/all/GCA/013/399/055/GCA_013399055.1_ASM1339905v1
Recurvirostra avosetta	GCA_004023745.1	Recurvirostra avosetta	NC_027420.1	16897	13	https://ftp.ncbi.nlm.nih.gov/genomes/all/GCA/004/023/745/GCA_004023745.1_ASM402374v1
Regulus satrapa	GCA_013396955.1	Regulus satrapa	NC_051014.1	16854	13	https://ftp.ncbi.nlm.nih.gov/genomes/all/GCA/013/396/955/GCA_013396955.1_ASM1339695v1
Rhabdornis inornatus	GCA_013397075.1	Rhabdornis inornatus	NC_051020.1	16840	13	https://ftp.ncbi.nlm.nih.gov/genomes/all/GCA/013/397/075/GCA_013397075.1_ASM1339707v1
Rhadina sibilatrix	GCA_013400275.1	Rhadina sibilatrix	NC_053060.1	16876	13	https://ftp.ncbi.nlm.nih.gov/genomes/all/GCA/013/400/275/GCA_013400275.1_ASM1340027v1
Rhagologus leucostigma	GCA_013397725.1	Rhagologus leucostigma	NC_040956.1	17044	13	https://ftp.ncbi.nlm.nih.gov/genomes/all/GCA/013/397/725/GCA_013397725.1_ASM1339772v1
Rhea americana	GCA_003343005.1	Rhea americana	NC_000846.1	16714	13	https://ftp.ncbi.nlm.nih.gov/genomes/all/GCA/003/343/005/GCA_003343005.1_rheAme1
Rhegmatorhina hoffmannsi	GCA_013398505.2	Rhegmatorhina hoffmannsi	NC_051466.1	16891	13	https://ftp.ncbi.nlm.nih.gov/genomes/all/GCA/013/398/505/GCA_013398505.2_LSU_RhHo_2.0
Rhinopomastus cyanomelas	GCA_013400115.1	Rhinopomastus cyanomelas	NC_052796.1	16778	13	https://ftp.ncbi.nlm.nih.gov/genomes/all/GCA/013/400/115/GCA_013400115.1_ASM1340011v1
Rhinoptilus africanus	GCA_013400135.1	Rhinoptilus africanus	MN356261.1	18084	13	https://ftp.ncbi.nlm.nih.gov/genomes/all/GCA/013/400/135/GCA_013400135.1_ASM1340013v1
Rhipidura dahli	GCA_013399225.1	Rhipidura dahli	NC_051029.1	16870	13	https://ftp.ncbi.nlm.nih.gov/genomes/all/GCA/013/399/225/GCA_013399225.1_ASM1339922v1
Rhodinocichla rosea	GCA_013396575.1	Rhodinocichla rosea	NC_053645.1	16765	13	https://ftp.ncbi.nlm.nih.gov/genomes/all/GCA/013/396/575/GCA_013396575.1_ASM1339657v1
Rhynochetos jubatus	GCA_013398095.1	Rhynochetos jubatus	NC_010091.1	16937	13	https://ftp.ncbi.nlm.nih.gov/genomes/all/GCA/013/398/095/GCA_013398095.1_ASM1339809v1
Rissa tridactyla	GCA_013401015.1	Rissa tridactyla	MN356420.1	15747	13	https://ftp.ncbi.nlm.nih.gov/genomes/all/GCA/013/401/015/GCA_013401015.1_ASM1340101v1
Rostratula benghalensis	GCA_013399305.1	Rostratula benghalensis	MN356297.1	15104	12	https://ftp.ncbi.nlm.nih.gov/genomes/all/GCA/013/399/305/GCA_013399305.1_ASM1339930v1
Rynchops niger	GCA_013400035.1	Rynchops niger	MN356248.1	18130	13	https://ftp.ncbi.nlm.nih.gov/genomes/all/GCA/013/400/035/GCA_013400035.1_ASM1340003v1
Sagittarius serpentarius	GCA_013399415.1	Sagittarius serpentarius	NC_023788.1	16773	13	https://ftp.ncbi.nlm.nih.gov/genomes/all/GCA/013/399/415/GCA_013399415.1_ASM1339941v1
Sakesphorus luctuosus	GCA_013396695.1	Sakesphorus luctuosus	NC_051011.1	16940	13	https://ftp.ncbi.nlm.nih.gov/genomes/all/GCA/013/396/695/GCA_013396695.1_ASM1339669v1
Sapayoa aenigma	GCA_013398745.1	Sapayoa aenigma	NC_053107.1	16945	13	https://ftp.ncbi.nlm.nih.gov/genomes/all/GCA/013/398/745/GCA_013398745.1_ASM1339874v1
Saxicola maurus maurus	GCA_900205225.1	Saxicola maurus	MN356403.1	15680	13	https://ftp.ncbi.nlm.nih.gov/genomes/all/GCA/900/205/225/GCA_900205225.1_Saxicola_maurus.2
Sclerurus mexicanus	GCA_013396755.1	Sclerurus mexicanus	NC_051010.1	16930	13	https://ftp.ncbi.nlm.nih.gov/genomes/all/GCA/013/396/755/GCA_013396755.1_ASM1339675v1
Scopus umbretta	GCA_013400535.1	Scopus umbretta	MN356281.1	17952	13	https://ftp.ncbi.nlm.nih.gov/genomes/all/GCA/013/400/535/GCA_013400535.1_ASM1340053v1
Scytalopus superciliaris	GCA_013400415.1	Scytalopus superciliaris	NC_053064.1	16883	13	https://ftp.ncbi.nlm.nih.gov/genomes/all/GCA/013/400/415/GCA_013400415.1_ASM1340041v1
Semnornis frantzii	GCA_013399775.1	Semnornis frantzii	MN356206.1	14885	12	https://ftp.ncbi.nlm.nih.gov/genomes/all/GCA/013/399/775/GCA_013399775.1_ASM1339977v1
Serilophus lunatus	GCA_013399895.1	Serilophus lunatus	NC_053051.1	16990	13	https://ftp.ncbi.nlm.nih.gov/genomes/all/GCA/013/399/895/GCA_013399895.1_ASM1339989v1
Serinus canaria	GCA_007115625.1	Serinus canaria	NC_037521.1	16805	13	https://ftp.ncbi.nlm.nih.gov/genomes/all/GCA/007/115/625/GCA_007115625.1_cibio_Scana_2019
Setophaga coronata coronata	GCA_001746935.2	Setophaga coronata coronata	CM027538.1	16808	13	https://ftp.ncbi.nlm.nih.gov/genomes/all/GCA/001/746/935/GCA_001746935.2_mywa_2.1
Setophaga kirtlandii	GCA_013399655.1	Setophaga kirtlandii	NC_051027.1	16807	13	https://ftp.ncbi.nlm.nih.gov/genomes/all/GCA/013/399/655/GCA_013399655.1_ASM1339965v1
Sitta europaea	GCA_013400255.1	Sitta europaea	NC_053059.1	16827	13	https://ftp.ncbi.nlm.nih.gov/genomes/all/GCA/013/400/255/GCA_013400255.1_ASM1340025v1
Spheniscus demersus	GCA_010077935.1	Spheniscus demersus	NC_022817.1	17346	13	https://ftp.ncbi.nlm.nih.gov/genomes/all/GCA/010/077/935/GCA_010077935.1_BGI_Sdem.V1
Spheniscus humboldti	GCA_010076325.1	Spheniscus humboldti	NC_036337.1	16658	13	https://ftp.ncbi.nlm.nih.gov/genomes/all/GCA/010/076/325/GCA_010076325.1_BGI_Shum.V1
Spheniscus magellanicus	GCA_010076225.1	Spheniscus magellanicus	NC_036264.1	16546	13	https://ftp.ncbi.nlm.nih.gov/genomes/all/GCA/010/076/225/GCA_010076225.1_BGI_Smag.V1
Spheniscus mendiculus	GCA_003264655.1	Spheniscus mendiculus	NC_036297.1	16367	13	https://ftp.ncbi.nlm.nih.gov/genomes/all/GCA/003/264/655/GCA_003264655.1_ASM326465v1
Spizaetus tyrannus	GCA_013399215.1	Spizaetus tyrannus	NC_052803.1	17479	13	https://ftp.ncbi.nlm.nih.gov/genomes/all/GCA/013/399/215/GCA_013399215.1_ASM1339921v1
Spizella passerina	GCA_013401375.1	Spizella passerina	NC_053084.1	16806	13	https://ftp.ncbi.nlm.nih.gov/genomes/all/GCA/013/401/375/GCA_013401375.1_ASM1340137v1
Sporophila hypoxantha	GCA_002167245.1	Sporophila hypoxantha	NC_051465.1	16778	13	https://ftp.ncbi.nlm.nih.gov/genomes/all/GCA/002/167/245/GCA_002167245.1_SpoHypox2.0
Steatornis caripensis	GCA_013398225.1	Steatornis caripensis	NC_052823.1	16908	13	https://ftp.ncbi.nlm.nih.gov/genomes/all/GCA/013/398/225/GCA_013398225.1_ASM1339822v1
Stercorarius parasiticus	GCA_013396915.1	Stercorarius parasiticus	NC_052780.1	16672	13	https://ftp.ncbi.nlm.nih.gov/genomes/all/GCA/013/396/915/GCA_013396915.1_ASM1339691v1
Sterna hirundo	GCA_009819605.1	Sterna hirundo	CM020500.1	19053	13	https://ftp.ncbi.nlm.nih.gov/genomes/all/GCA/009/819/605/GCA_009819605.1_bSteHir1.pri
Sterrhoptilus dennistouni	GCA_013397095.1	Sterrhoptilus dennistouni	MN356193.1	14901	12	https://ftp.ncbi.nlm.nih.gov/genomes/all/GCA/013/397/095/GCA_013397095.1_ASM1339709v1
Stictonetta naevosa	GCA_011074415.1	Stictonetta naevosa	CM021835.1	16778	13	https://ftp.ncbi.nlm.nih.gov/genomes/all/GCA/011/074/415/GCA_011074415.1_BPBGC_Snae_1.0
Strigops habroptila	GCA_004027225.2	Strigops habroptila	CM013787.2	17830	13	https://ftp.ncbi.nlm.nih.gov/genomes/all/GCA/004/027/225/GCA_004027225.2_bStrHab1.2.pri
Strix occidentalis caurina	GCA_002372975.2	Strix occidentalis caurina	CM030376.1	19889	13	https://ftp.ncbi.nlm.nih.gov/genomes/all/GCA/002/372/975/GCA_002372975.2_StrOccCau_2.0
Struthidea cinerea	GCA_013397865.1	Struthidea cinerea	NC_053087.1	16931	13	https://ftp.ncbi.nlm.nih.gov/genomes/all/GCA/013/397/865/GCA_013397865.1_ASM1339786v1
Struthio camelus australis	GCA_000698965.1	Struthio camelus	NC_002785.1	16595	13	https://ftp.ncbi.nlm.nih.gov/genomes/all/GCA/000/698/965/GCA_000698965.1_ASM69896v1
Sturnus vulgaris	GCA_001447265.1	Sturnus vulgaris	NC_029360.1	16793	13	https://ftp.ncbi.nlm.nih.gov/genomes/all/GCA/001/447/265/GCA_001447265.1_Sturnus_vulgaris-1.0
Sula dactylatra	GCA_013389905.1	Sula dactylatra	MN356269.1	17259	13	https://ftp.ncbi.nlm.nih.gov/genomes/all/GCA/013/389/905/GCA_013389905.1_ASM1338990v1
Sylvia atricapilla	GCA_009819655.1	Sylvia atricapilla	NC_010228.1	17937	13	https://ftp.ncbi.nlm.nih.gov/genomes/all/GCA/009/819/655/GCA_009819655.1_bSylAtr1.pri
Sylvia borin	GCA_014839755.1	Sylvia borin	NC_053054.1	17971	13	https://ftp.ncbi.nlm.nih.gov/genomes/all/GCA/014/839/755/GCA_014839755.1_bSylBor1.pri
Sylvietta virens	GCA_013399515.1	Sylvietta virens	MN356305.1	14940	12	https://ftp.ncbi.nlm.nih.gov/genomes/all/GCA/013/399/515/GCA_013399515.1_ASM1339951v1
Syrrhaptes paradoxus	GCA_013400615.1	Syrrhaptes paradoxus	MN356289.1	22005	12	https://ftp.ncbi.nlm.nih.gov/genomes/all/GCA/013/400/615/GCA_013400615.1_ASM1340061v1
Tachuris rubrigastra	GCA_013396555.1	Tachuris rubrigastra	NC_051005.1	17134	13	https://ftp.ncbi.nlm.nih.gov/genomes/all/GCA/013/396/555/GCA_013396555.1_ASM1339655v1
Tachycineta bicolor	GCA_007636935.1	Tachycineta bicolor	NC_020596.1	17945	13	https://ftp.ncbi.nlm.nih.gov/genomes/all/GCA/007/636/935/GCA_007636935.1_CLO_TRES_1
Taeniopygia guttata	GCA_003957565.4	Taeniopygia guttata	CM016613.2	16855	13	https://ftp.ncbi.nlm.nih.gov/genomes/all/GCA/003/957/565/GCA_003957565.4_bTaeGut1.4.pri
Tauraco erythrolophus	GCA_000709365.1	Tauraco erythrolophus	MN356149.1	9427	11	https://ftp.ncbi.nlm.nih.gov/genomes/all/GCA/000/709/365/GCA_000709365.1_ASM70936v1
Thalassarche chlororhynchos	GCA_013400895.1	Thalassarche chlororhynchos	MN356342.1	18907	13	https://ftp.ncbi.nlm.nih.gov/genomes/all/GCA/013/400/895/GCA_013400895.1_ASM1340089v1
Thinocorus orbignyianus	GCA_013400375.1	Thinocorus orbignyianus	MN356267.1	16753	13	https://ftp.ncbi.nlm.nih.gov/genomes/all/GCA/013/400/375/GCA_013400375.1_ASM1340037v1
Thryothorus ludovicianus	GCA_013397245.1	Thryothorus ludovicianus	NC_051032.1	16794	13	https://ftp.ncbi.nlm.nih.gov/genomes/all/GCA/013/397/245/GCA_013397245.1_ASM1339724v1
Tichodroma muraria	GCA_013390105.1	Tichodroma muraria	NC_053081.1	16801	13	https://ftp.ncbi.nlm.nih.gov/genomes/all/GCA/013/390/105/GCA_013390105.1_ASM1339010v1
Tinamus guttatus	GCA_000705375.2	Tinamus guttatus	NC_027260.1	16750	13	https://ftp.ncbi.nlm.nih.gov/genomes/all/GCA/000/705/375/GCA_000705375.2_ASM70537v2
Todus mexicanus	GCA_013389965.1	Todus mexicanus	NC_052799.1	16998	13	https://ftp.ncbi.nlm.nih.gov/genomes/all/GCA/013/389/965/GCA_013389965.1_ASM1338996v1
Toxostoma redivivum	GCA_013397375.1	Toxostoma redivivum	NC_053053.1	16780	13	https://ftp.ncbi.nlm.nih.gov/genomes/all/GCA/013/397/375/GCA_013397375.1_ASM1339737v1
Tricholaema leucomelas	GCA_013400475.1	Tricholaema leucomelas	MN356262.1	14916	12	https://ftp.ncbi.nlm.nih.gov/genomes/all/GCA/013/400/475/GCA_013400475.1_ASM1340047v1
Trogon melanurus	GCA_013399275.1	Trogon melanurus	NC_052802.1	17280	13	https://ftp.ncbi.nlm.nih.gov/genomes/all/GCA/013/399/275/GCA_013399275.1_ASM1339927v1
Turdus rufiventris	GCA_013186435.1	Turdus rufiventris	NC_028179.1	16669	13	https://ftp.ncbi.nlm.nih.gov/genomes/all/GCA/013/186/435/GCA_013186435.1_ASM1318643v1
Turnix velox	GCA_013400935.1	Turnix velox	NC_052815.1	16972	13	https://ftp.ncbi.nlm.nih.gov/genomes/all/GCA/013/400/935/GCA_013400935.1_ASM1340093v1
Tympanuchus cupido pinnatus	GCA_001870855.1	Tympanuchus cupido	MW574394.1	16697	13	https://ftp.ncbi.nlm.nih.gov/genomes/all/GCA/001/870/855/GCA_001870855.1_T_cupido_pinnatus_GPC_3440_v1
Tyrannus savana	GCA_013399735.1	Tyrannus savana	NC_051025.1	17112	13	https://ftp.ncbi.nlm.nih.gov/genomes/all/GCA/013/399/735/GCA_013399735.1_ASM1339973v1
Tyto alba	GCA_018691265.1	Tyto alba	EU410491.1	16148	13	https://ftp.ncbi.nlm.nih.gov/genomes/all/GCA/018/691/265/GCA_018691265.1_T.alba_DEE_v4.0
Tyto alba alba	GCA_902150015.1	Tyto alba	EU410491.1	16148	13	https://ftp.ncbi.nlm.nih.gov/genomes/all/GCA/902/150/015/GCA_902150015.1_genome_assembly_l500
Upupa epops	GCA_013397515.1	Upupa epops	NC_028178.1	16562	13	https://ftp.ncbi.nlm.nih.gov/genomes/all/GCA/013/397/515/GCA_013397515.1_ASM1339751v1
Uria aalge	GCA_013401055.1	Uria aalge	MN356418.1	18089	13	https://ftp.ncbi.nlm.nih.gov/genomes/all/GCA/013/401/055/GCA_013401055.1_ASM1340105v1
Uria aalge inornata	GCA_014363425.1	Uria aalge	MN356418.1	18089	13	https://ftp.ncbi.nlm.nih.gov/genomes/all/GCA/014/363/425/GCA_014363425.1_U_aalge_scaffold_01
Uria lomvia	GCA_002289315.1	Uria lomvia	MN356404.1	836	1	https://ftp.ncbi.nlm.nih.gov/genomes/all/GCA/002/289/315/GCA_002289315.1_UriLom_1.1
Urocolius indicus	GCA_013401255.1	Urocolius indicus	NC_052817.1	17267	13	https://ftp.ncbi.nlm.nih.gov/genomes/all/GCA/013/401/255/GCA_013401255.1_ASM1340125v1
Urocynchramus pylzowi	GCA_013397555.1	Urocynchramus pylzowi	NC_053079.1	16879	13	https://ftp.ncbi.nlm.nih.gov/genomes/all/GCA/013/397/555/GCA_013397555.1_ASM1339755v1
Vidua chalybeata	GCA_013398495.1	Vidua chalybeata	NC_000880.1	16895	13	https://ftp.ncbi.nlm.nih.gov/genomes/all/GCA/013/398/495/GCA_013398495.1_ASM1339849v1
Vidua macroura	GCA_013400395.1	Vidua macroura	NC_053065.1	16874	13	https://ftp.ncbi.nlm.nih.gov/genomes/all/GCA/013/400/395/GCA_013400395.1_ASM1340039v1
Vireo altiloquus	GCA_013396875.1	Vireo altiloquus	NC_051016.1	17193	13	https://ftp.ncbi.nlm.nih.gov/genomes/all/GCA/013/396/875/GCA_013396875.1_ASM1339687v1
Xiphorhynchus elegans	GCA_013401175.1	Xiphorhynchus elegans	NC_051470.1	16943	13	https://ftp.ncbi.nlm.nih.gov/genomes/all/GCA/013/401/175/GCA_013401175.1_ASM1340117v1
Zapornia atra	GCA_013400835.1	Zapornia atra	NC_052808.1	16968	13	https://ftp.ncbi.nlm.nih.gov/genomes/all/GCA/013/400/835/GCA_013400835.1_ASM1340083v1
Zonotrichia albicollis	GCA_000385455.1	Zonotrichia albicollis	NC_053110.1	16781	13	https://ftp.ncbi.nlm.nih.gov/genomes/all/GCA/000/385/455/GCA_000385455.1_Zonotrichia_albicollis-1.0.1
Zosterops borbonicus	GCA_007252995.1	Zosterops borbonicus	MK529728.1	17890	13	https://ftp.ncbi.nlm.nih.gov/genomes/all/GCA/007/252/995/GCA_007252995.1_ZoBo_15179_v2.0
Zosterops hypoxanthus	GCA_013399795.1	Zosterops hypoxanthus	MN356202.1	14902	12	https://ftp.ncbi.nlm.nih.gov/genomes/all/GCA/013/399/795/GCA_013399795.1_ASM1339979v1
Zosterops japonicus	GCA_017612475.1	Zosterops japonicus	MW574481.1	17819	13	https://ftp.ncbi.nlm.nih.gov/genomes/all/GCA/017/612/475/GCA_017612475.1_CCG_JAWE_1.0
Zosterops lateralis melanops	GCA_001281735.1	Zosterops lateralis	NC_029146.1	17821	13	https://ftp.ncbi.nlm.nih.gov/genomes/all/GCA/001/281/735/GCA_001281735.1_ASM128173v1
Zosterops pallidus	GCA_007556475.1	Zosterops pallidus	MK524996.1	17826	13	https://ftp.ncbi.nlm.nih.gov/genomes/all/GCA/007/556/475/GCA_007556475.1_ZoPa_MNHNZO2015-572_v1.0
Calidris pygmaea	GCA_003697955.1	Calidris pygmaea	QJSC01029819.1	16778	12	https://ftp.ncbi.nlm.nih.gov/genomes/all/GCA/003/697/955/GCA_003697955.1_ASM369795v1
